# Supplementary material
Source: PubMed Central journal article supplement (PMC2596606)

**AMINO ACID DERIVED ENAMINONES: A STUDY IN RING FORMATION  
PROVIDING VALUABLE ASYMMETRIC SYNTHONS**

Brandon J. Turunen and Gunda I. Georg\*

*Department of Medicinal Chemistry and Center for Methodology and Library  
Development, University of Kansas, 1251 Wescoe Hall, Drive Lawrence, Kansas 66045*

|                                                                                                                                     |         |
|-------------------------------------------------------------------------------------------------------------------------------------|---------|
| 1. General experimental paragraph.....                                                                                              | S2      |
| 2. Representative procedures and characterization data for <b>2</b> and <b>3</b> .....                                              | S2-S5   |
| 3. Characterization data for compounds <b>4-26</b> , <b>29</b> and <b>30</b> .....                                                  | S5-S17  |
| 4. References.....                                                                                                                  | S17     |
| 5. <sup>1</sup> H and <sup>13</sup> C spectra for compounds <b>2</b> , <b>4-19</b> , <b>21-26</b> , <b>29</b> , and <b>30</b> ..... | S18-S69 |

### General experimental paragraph.

All commercially available reagents and solvents were used without further purification unless otherwise noted. Methylene chloride was dried by distillation from calcium hydride. Flash column chromatography was carried out on silica gel. TLC was conducted on silica gel 250 micron, F<sub>254</sub> plates. <sup>1</sup>H NMR spectra were recorded on 400 MHz or 500 MHz NMR instruments. Chemical shifts are reported in ppm with the solvent as internal standard (CDCl<sub>3</sub>: 7.28 ppm). Data are reported as follows: chemical shift, integration, multiplicity (s = singlet, d = doublet, t = triplet, q = quartet, br = broad, m = multiplet), coupling constants (Hz) and assignment. <sup>13</sup>C NMR spectra were recorded on 100 MHz or 125 MHz NMR spectrometers with complete proton decoupling. Chemical shifts are reported in ppm with the solvent as internal standard (CDCl<sub>3</sub>: 77.0 ppm). High-resolution mass spectrometry was performed by the University of Kansas Mass Spectroscopy Service Laboratory. All new compounds were determined to be >95% as determined by <sup>1</sup>H NMR spectroscopy.

### Representative procedure for N-Boc ynone preparation.

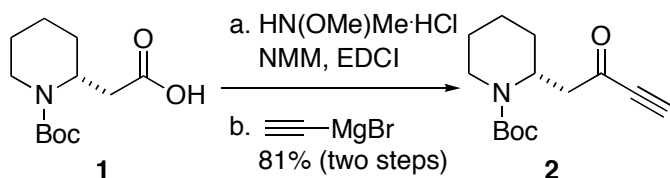

(S)-tert-Butyl 2-(2-(Methoxy(methyl)amino)-2-oxoethyl)piperidine-1-carboxylate

(**1a**). (*R*)-2-(1-(*tert*-Butoxycarbonyl)piperidin-2-yl)acetic acid (**1**, 1.00 g, 4.0 mmol) was dissolved in anhydrous CH<sub>2</sub>Cl<sub>2</sub> (100 mL) under argon atmosphere and cooled to -15 °C. To this solution was added *N,O*-dimethylhydroxylamine·HCl (0.42 g, 4.27 mmol) and *N*-

methylmorpholine (0.05 mL, 4.44 mmol) followed by EDCI (0.82 g, 4.27 mmol) in portions over 30 minutes then allowed to come to room temperature. After 2 hours the reaction was again cooled to 0 °C and quenched by the addition of an ice cold 10% HCl solution (25 mL) and allowed to stir at this temperature for 5 minutes. The reaction was diluted with water (50 mL) and extracted with CH<sub>2</sub>Cl<sub>2</sub> (x3). The combined organic layers were washed with saturated NaHCO<sub>3</sub> (x1), dried over Na<sub>2</sub>SO<sub>4</sub>, filtered and concentrated. This crude material was purified via flash chromatography (3 hexane/1 EtOAc) to provide 1.14 g of the amide as an oily solid (96%): <sup>1</sup>H NMR (400 MHz, CDCl<sub>3</sub>, 50 °C)  $\delta$  1.33-1.45 (bm, 1H) 1.43 (s, 9H), 1.44-1.52 (bm, 5H), 2.47-2.59 (m, 2H), 2.70 (bt, *J* = 13 Hz, 1H), 3.01 (s, 3H), 3.57 (s, 3H), 3.88 (bd, *J* = 13 Hz, 1H), 4.58 (bs, 1H); <sup>13</sup>C NMR (100 MHz, CDCl<sub>3</sub>, 50 °C)  $\delta$  19.3, 25.7, 28.8, 32.4, 33.1, 39.7, 48.0, 61.6, 79.7, 155.1, 172.6; IR (neat) 3564, 2933, 1690, 1447, 1255 cm<sup>-1</sup>; HRMS (ES+) *m/z* calc'd for [M+H]<sup>+</sup> C<sub>14</sub>H<sub>27</sub>N<sub>2</sub>O<sub>4</sub> : 287.1971, found 287.1957; [ $\delta$ ]<sup>22</sup><sub>D</sub> -6.0 (*c* = 1.0, CHCl<sub>3</sub>).

**(*R*)-tert-Butyl 2-(2-Oxobut-3-ynyl)piperidine-1-carboxylate (2).** The Weinreb amide (**1a**, 0.72 g, 2.52 mmol) was dissolved in anhydrous THF (40 mL) under argon atmosphere and cooled to 0 °C. To this reaction vessel, was added dropwise, a 0.5 M solution of ethynyl magnesium bromide (12.6 mL, 6.3 mmol) in THF and allowed to come to room temperature. After 2 hours the reaction was judged complete by TLC (1 hexanes / 1 EtOAc) and again cooled to 0 °C. The reaction was quenched by the addition of an ice cold 10% HCl solution (15 mL) and allowed to stir at this temperature for 5 minutes. The reaction was diluted with water and extracted with EtOAc (x3). The combined organic layers were washed with saturated NaHCO<sub>3</sub> (x1), dried over Na<sub>2</sub>SO<sub>4</sub>,

filtered and concentrated. This crude material was purified via flash chromatography (8 hexane/1 EtOAc) to provide 0.53 g of a colorless oil (84%):  $^1\text{H}$  NMR (500 MHz,  $\text{CDCl}_3$ )  $\delta$  1.41-1.51 (m, 2H), 1.44 (s, 9H), 1.59-1.76 (m, 4H), 2.77-2.84 (m, 2H), 2.87-2.90 (m, 1H), 3.29 (s, 1H), 4.01 (bs, 1H), 4.85 (bs, 1H);  $^{13}\text{C}$  NMR (125 MHz,  $\text{CDCl}_3$ )  $\delta$  18.8, 25.1, 28.3, 28.4, 39.1, 45.8, 47.4, 78.8, 79.8, 81.5, 154.5, 185.0; IR (neat) 3211, 2937, 2090, 1680, 1411, 1165  $\text{cm}^{-1}$ ; HRMS (FAB+)  $m/z$  calc'd for  $[\text{M}+\text{Na}]^+$   $\text{C}_{14}\text{H}_{21}\text{NO}_3\text{Na}$  : 274.1419, found 274.1419;  $[\alpha]_{\text{D}}^{22}$  -38 ( $c = 0.65$ ,  $\text{CHCl}_3$ ).

**Representative procedure for conversion of ynone to enaminone:**

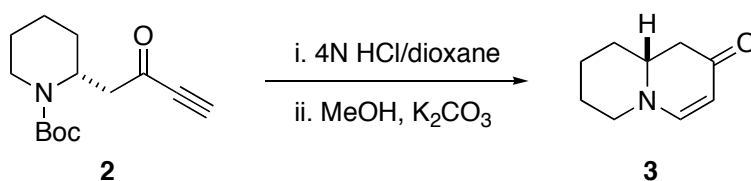

**(R)-7,8,9,9a-Tetrahydro-1H-quinolizin-2(6H)-one (3).** **METHOD 1:** Ynone (**2**, 72 mg, 0.48 mmol) was dissolved in a 4N HCl-dioxane solution (1.5 mL) and allowed to react for 15 minutes. After this time the dioxane and excess HCl were removed under reduced pressure and this residue placed under vacuum for 15 minutes. This material was then dissolved in MeOH (10 mL) and excess  $\text{K}_2\text{CO}_3$  (a minimum of 4 equivalents) was added. The reaction was judged to be complete by TLC (10% MeOH/ $\text{CH}_2\text{Cl}_2$ ) in 15 minutes. At this time  $\text{CH}_2\text{Cl}_2$  was added, the reaction suction filtered, and the organic solvents concentrated. This residue was purified via flash chromatography (1-5% MeOH/ $\text{CH}_2\text{Cl}_2$ ) to provide 37 mg (87%) of an off-white solid: Spectral data of the title compound was identical to that reported in the literature with the exception of optical rotation:  $[\alpha]_{\text{D}}^{22}$  -135 ( $c = 0.925$ ,  $\text{CHCl}_3$ ). Comparison to the reported value,  $[\alpha]_{\text{D}}^{22}$  -146 ( $c$

= 0.885, CHCl<sub>3</sub>), indicated an ee of 93%. This enantiomeric ratio was verified via chiral HPLC using a Baker Chiralcel OJ column. Conditions: isopropanol 2-15% in hexanes, 60 minutes, 0.5 mL/min, 30 °C. (-)-Enantiomer: R<sub>t</sub> = 40.1 min; (+)-Enantiomer: R<sub>t</sub> = 41.6 min. ee = 94%.<sup>1</sup>

**METHOD 2:** The ynone **2** (28 mg, 0.11 mmol) was dissolved in anhydrous CH<sub>2</sub>Cl<sub>2</sub> (10 mL) under an argon atmosphere and cooled to -78 °C. A solution of TMS-I (0.03 mL, 0.11 mmol) in anhydrous CH<sub>2</sub>Cl<sub>2</sub> (1 mL) was then added dropwise at this temperature. After 20 minutes at this temperature the reaction was allowed to warm to 0 °C and additional TMS-I (0.03-0.11 mmol) was added until all starting material was consumed (TLC, 3 hexanes / 1 EtOAc). After 20 minutes the reaction was judged complete and this mixture was concentrated under reduced pressure and placed under vacuum for 15 minutes. This residue was then dissolved in MeOH (5 mL) and excess K<sub>2</sub>CO<sub>3</sub> was added. The reaction was monitored via TLC (10% MeOH/CH<sub>2</sub>Cl<sub>2</sub>) and judged complete after 30 minutes. At this time CH<sub>2</sub>Cl<sub>2</sub> was added and the resultant slurry suction filtered the organic layer concentrated. This residue was purified via flash chromatography (5% MeOH/CH<sub>2</sub>Cl<sub>2</sub>) to provide 16 mg (95%) enamionone **3**. The enantiomeric excess using this method was not determined on this example.

**Ynone characterization data (4-14):**

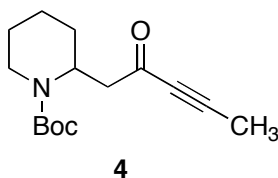

**tert-Butyl 2-(2-Oxopent-3-ynyl)piperidine-1-carboxylate (4).**  $^1\text{H}$  NMR (500 MHz,  $\text{CDCl}_3$ )  $\delta$  1.25-1.48 (m, 2H), 1.42 (s, 9H), 1.55-1.67 (m, 4H), 2.02 (s, 3H), 2.75-2.80 (m, 3H), 4.00 (bs, 1H), 4.81 (bs, 1H);  $^{13}\text{C}$  NMR (125 MHz,  $\text{CDCl}_3$ )  $\delta$  4.1, 18.8, 25.2, 28.3, 39.2, 45.7, 47.6, 79.6, 80.3, 90.5, 154.6, 185.7; IR (neat) 2974, 2936, 2862, 2218, 1670, 1410, 1157  $\text{cm}^{-1}$ ; HRMS (ES+)  $m/z$  calc'd for  $[\text{M}+\text{H}]^+$   $\text{C}_{15}\text{H}_{24}\text{NO}_3$  : 266.1756, found 266.1750.

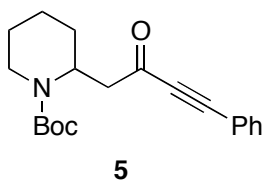

**tert-Butyl 2-(2-Oxo-4-phenylbut-3-ynyl)piperidine-1-carboxylate (5).**  $^1\text{H}$  NMR (500 MHz,  $\text{CDCl}_3$ )  $\delta$  1.39-1.55 (m, 2H), 1.44 (s, 9H), 1.64-1.73 (m, 4H), 2.85 (dd,  $J = 14$  Hz, 9 Hz, 2H), 2.97 (dd,  $J = 14$  Hz, 7 Hz, 1H), 4.06 (bs, 1H), 4.89 (bs, 1H), 7.23-7.41 (m, 2H), 7.44-7.47 (m, 1H), 7.58 (d,  $J = 7$  Hz, 2H);  $^{13}\text{C}$  NMR (125 MHz,  $\text{CDCl}_3$ )  $\delta$  18.7, 25.2, 28.3, 39.1, 45.8, 47.8, 53.4, 79.6, 88.0, 91.0, 119.8, 128.5, 130.6, 133.0, 154.5, 185.6; IR (neat) 3410, 2359, 2202, 1654  $\text{cm}^{-1}$ ; HRMS (ES+)  $m/z$  calc'd for  $[\text{M}+\text{H}]^+$   $\text{C}_{20}\text{H}_{26}\text{NO}_3$  : 328.1913, found 328.1907.

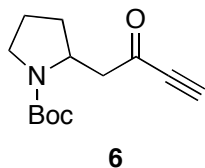

**tert-Butyl 2-(2-Oxobut-3-ynyl)pyrrolidine-1-carboxylate (6).**  $^1\text{H}$  NMR (500 MHz,  $\text{CDCl}_3$ , 50  $^\circ\text{C}$ )  $\delta$  1.38 (s, 9H), 1.60-1.67 (bs, 1H), 1.72-1.80 (m, 2H), 2.00-2.09 (m, 1H),

2.52-2.59 (m, 1H), 3.19 (s, 1H), 3.22 (bm, 3H), 4.13-4.22 (bm, 1H);  $^{13}\text{C}$  NMR (125 MHz,  $\text{CDCl}_3$ )  $\square$  23.6, 28.4, 31.5, 46.8, 50.0, 53.4, 78.0, 79.5, 81.7, 154.5, 183.0; IR (neat) 3209, 2977, 2881, 2092, 1707, 1414, 1179  $\text{cm}^{-1}$ ; HRMS (FAB+)  $m/z$  calc'd for  $[\text{M}+\text{H}]^+$   $\text{C}_{13}\text{H}_{20}\text{NO}_3$  : 238.1443, found 238.1440.

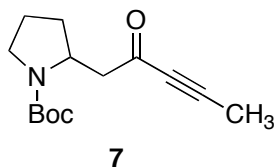

**tert-Butyl 2-(2-Oxopent-3-ynyl)pyrrolidine-1-carboxylate (7).**  $^1\text{H}$  NMR (500 MHz,  $\text{CDCl}_3$ , 50  $^\circ\text{C}$ )  $\square$  1.43 (s, 9H), 1.64 (bs, 1H), 1.78-1.99 (m, 2H), 1.99 (s, 3H), 2.00-2.08 (m, 1H), 2.45-2.53 (m, 1H) 2.82-3.10 (bs, 1H), 3.28-3.40 (m, 2H), 4.20 (bs, 1H);  $^{13}\text{C}$  NMR (125 MHz,  $\text{CDCl}_3$ )  $\square$  3.8, 23.5, 28.4, 31.0, 46.6, 50.1, 53.6, 80.0, 80.5, 91.0, 154.5, 186.6; IR (neat) 2975, 2939, 2216, 1670, 1397, 1163  $\text{cm}^{-1}$ ; HRMS (ES+)  $m/z$  calc'd for  $[\text{M}+\text{H}]^+$   $\text{C}_{14}\text{H}_{22}\text{NO}_3$  : 252.1600, found 252.1591.

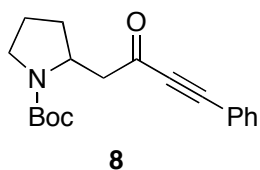

**tert-Butyl 2-(2-Oxo-4-phenylbut-3-ynyl)pyrrolidine-1-carboxylate (8).**  $^1\text{H}$  NMR (500 MHz,  $\text{CDCl}_3$ , 50  $^\circ\text{C}$ )  $\square$  1.40 (s, 9H), 1.60-1.66 (bs, 1H) 1.66-1.75 (m, 2H), 1.96-2.02 (m, 1H), 2.55-2.61 (m, 1H), 3.00-3.12 (bs, 1H), 3.19-3.29 (bs, 2H), 4.12-4.18 (m, 1H), 7.18-7.21 (m, 2H), 7.25-7.28 (m, 1H), 7.38-7.42 (m, 2H);  $^{13}\text{C}$  NMR (125 MHz,  $\text{CDCl}_3$ )  $\square$  23.5, 28.6, 31.4, 36.7, 50.4, 54.0, 56.8, 80.0, 88.2, 91.3, 120.1, 128.5, 130.6, 133.0, 154.4,

186.2; IR (neat) 2974, 2878, 2203, 1695, 1395, 1168  $\text{cm}^{-1}$ ; HRMS (ES+)  $m/z$  calc'd for  $[\text{M}+\text{H}]^+$   $\text{C}_{19}\text{H}_{24}\text{NO}_3$  : 314.1756, found 314.1729.

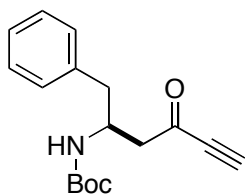

9

**(S)-tert-Butyl 4-Oxo-1-phenylhex-5-yn-2-ylcarbamate (9).**  $^1\text{H}$  NMR (400 MHz,  $\text{CDCl}_3$ )  $\delta$  1.41 (s, 9H), 2.76-2.97 (m, 3H), 2.77-2.84 (m, 1H), 3.30 (s, 1H), 4.23-4.31 (m, 1H), 4.89 (d,  $J = 8$  Hz, 1H), 7.18-7.33 (m, 5H);  $^{13}\text{C}$  NMR (100 MHz,  $\text{CDCl}_3$ )  $\delta$  28.7, 40.6, 48.8, 49.0, 79.8, 79.9, 81.7, 127.1, 129.0, 129.8, 137.9, 155.5, 185.9; IR (neat) 3352, 3265, 2095, 1685  $\text{cm}^{-1}$ ; HRMS (FAB+)  $m/z$  calc'd for  $[\text{M}+\text{H}]^+$   $\text{C}_{17}\text{H}_{22}\text{NO}_3$  : 288.1600, found 288.1596;  $[\alpha]_D^{22} -7.0$  ( $c = 0.55$ ,  $\text{CHCl}_3$ )

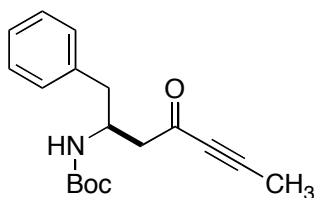

10

**(S)-tert-Butyl 4-Oxo-1-phenylhept-5-yn-2-ylcarbamate (10).**  $^1\text{H}$  NMR (400 MHz,  $\text{CDCl}_3$ )  $\delta$  1.38 (s, 9H), 2.00 (s, 3H), 2.67 (d,  $J = 6$  Hz, 2H), 2.75-2.92 (m, 2H), 4.23 (bs, 1H), 4.97 (d,  $J = 8$  Hz, 1H), 7.08-7.28 (m, 5H);  $^{13}\text{C}$  NMR (100 MHz,  $\text{CDCl}_3$ )  $\delta$  4.5, 28.7, 40.7, 48.7, 49.1, 79.6, 80.6, 91.5, 127.0, 128.9, 129.8, 138.2, 155.5, 186.6; IR (neat)



3350, 2975, 2929, 2219, 1699, 1164  $\text{cm}^{-1}$ ; HRMS (FAB+)  $m/z$  calc'd for  $[\text{M}+\text{H}]^+$   $\text{C}_{18}\text{H}_{24}\text{NO}_3$  : 302.1756, found 302.1761;  $[\alpha]_D^{22}$  -2.0 ( $c = 0.65$ ,  $\text{CHCl}_3$ ).

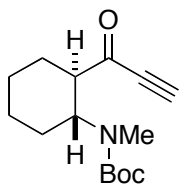

+/- 11

**tert-Butyl Methyl((*trans*)-2-propioloylcyclohexyl)carbamate (11).**  $^1\text{H}$  NMR (400 MHz,  $\text{CDCl}_3$ , 50  $^\circ\text{C}$ )  $\delta$  1.15-1.29 (m, 2H), 1.32-1.73 (m, 2H), 1.46 (s, 9H), 1.79-1.89 (m, 3H), 1.93-1.98 (m, 1H), 2.75 (bs, 3H), 2.77-2.88 (m, 1H), 3.25 (s, 1H), 4.00-4.23 (bm, 1H);  $^{13}\text{C}$  NMR (125 MHz,  $\text{CDCl}_3$ , 50  $^\circ\text{C}$ , rotomeric)  $\delta$  24.5, 25.1, 28.3, 28.8, 29.7, 55.3, 55.9, 56.8, 79.5, 80.2, 80.8, 155.1, 188.8; IR (neat) 3211, 2933, 2860, 2089, 1690, 1151  $\text{cm}^{-1}$ ; HRMS (ES+)  $m/z$  calc'd for  $[\text{M}+\text{H}]^+$   $\text{C}_{15}\text{H}_{24}\text{NO}_3$  : 266.1756, found 266.1757.

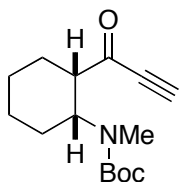

+/- 12

**tert-Butyl Methyl((*cis*)-2-propioloylcyclohexyl)carbamate (12).**  $^1\text{H}$  NMR (400 MHz,  $\text{CDCl}_3$ , 50  $^\circ\text{C}$ )  $\delta$  1.15-1.8 (m, 5H), 1.46 (s, 9H), 1.87-1.90 (m, 1H), 2.04-2.09 (m, 1H), 2.14-2.18 (m, 1H), 2.79 (s, 3H), 3.18 (s, 1H), 3.44 (bs, 1H), 3.98 (bs, 1H);  $^{13}\text{C}$  NMR (125 MHz,  $\text{CDCl}_3$ , 50  $^\circ\text{C}$ , rotomeric)  $\delta$  21.3, 25.7, 26.2, 27.7, 28.2, 29.5, 52.2, 56.1, 77.3, 79.5,

82.2, 155.6, 188.6; IR (neat) 3400, 2929, 2858, 2087, 1690, 1148  $\text{cm}^{-1}$ ; HRMS (ES+)  $m/z$  calc'd for  $[\text{M}+\text{H}]^+$   $\text{C}_{15}\text{H}_{24}\text{NO}_3$  : 266.1756, found 266.1749.

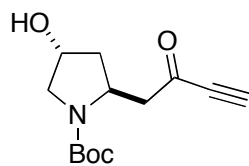

**13**

**(2S,4R)-tert-Butyl 4-Hydroxy-2-(2-oxobut-3-ynyl)pyrrolidine-1-carboxylate (13).**  $^1\text{H}$  NMR (400 MHz,  $\text{CDCl}_3$ , 50  $^\circ\text{C}$ )  $\delta$  1.42 (s, 9H), 1.76-1.82 (bm, 1H), 2.12-2.17 (bm, 1H), 2.66 (dd,  $J = 16$  Hz, 9 Hz, 1H), 2.90 (bs, 1H), 3.20 (bs, 1H), 3.31 (s, 1H), 3.33-3.42 (m, 2H), 4.27-4.34 (m, 2H);  $^{13}\text{C}$  NMR (100 MHz,  $\text{CDCl}_3$ )  $\delta$  28.8, 40.7, 50.5, 52.6, 55.0, 69.4, 79.6, 80.4, 82.0, 155.0, 185.4; IR (neat) 3400, 3250, 2990, 2900, 2100, 1700, 1400  $\text{cm}^{-1}$ ; HRMS (ES+)  $m/z$  calc'd for  $[\text{M}+\text{H}]^+$   $\text{C}_{13}\text{H}_{20}\text{NO}_4$  : 254.1392, found 254.1389;  $[\alpha]_D^{22} -55$  ( $c = 0.89$ ,  $\text{CHCl}_3$ ).

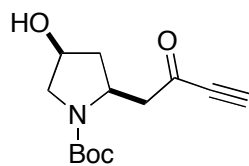

**14**

**(2S,4S)-tert-Butyl 4-Hydroxy-2-(2-oxobut-3-ynyl)pyrrolidine-1-carboxylate (14).**  $^1\text{H}$  NMR (400 MHz,  $\text{CDCl}_3$ , 50  $^\circ\text{C}$ )  $\delta$  1.47 (s, 9H), 1.85 (bd,  $J = 14$  Hz, 1H), 2.03 (s, 1H), 2.26 (ddd,  $J = 14$  Hz, 9 Hz, 5 Hz, 1H), 3.08 (dd,  $J = 16$  Hz, 9 Hz, 1H), 3.23 (s, 1H), 3.38 (bd,  $J = 12$  Hz, 2H), 3.59 (dd,  $J = 12$  Hz, 5 Hz, 1H), 4.27-4.34 (m, 1H), 4.43-4.47 (m, 1H);  $^{13}\text{C}$  NMR (100 MHz,  $\text{CDCl}_3$ )  $\delta$  28.9, 39.7, 51.1, 53.1, 55.4, 70.8, 78.8, 80.4, 82.2,

154.6, 186.0; IR (neat) 3400, 2975, 2090, 1680, 1400  $\text{cm}^{-1}$ ; HRMS (ES+)  $m/z$  calc'd for  $[\text{M}+\text{H}]^+ \text{C}_{13}\text{H}_{20}\text{NO}_4$  : 254.1392, found 254.1393;  $[\square]^{22}_{\text{D}} -4$  ( $c = 0.6$ ,  $\text{CHCl}_3$ ).

**Enaminone characterization data (15-25):**

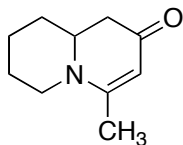

**15**

**4-Methyl-7,8,9,9a-tetrahydro-1H-quinolizin-2(6H)-one (15).**  $^1\text{H}$  NMR (400 MHz,  $\text{CDCl}_3$ )  $\square$  1.37-1.86 (m, 6H), 1.95 (s, 3H), 2.25 (dd,  $J = 10.6$  Hz, 16.5 Hz, 1H), 2.48 (dd,  $J = 16.5$  Hz, 5.7 Hz, 1H), 2.76-2.82 (m, 1H), 3.28-3.38 (m, 1H), 3.74-3.78 (m, 1H), 4.95 (s, 1H);  $^{13}\text{C}$  NMR (100 MHz,  $\text{CDCl}_3$ )  $\square$  21.6, 24.1, 26.1, 31.8, 43.2, 48.5, 59.0, 102.1, 163.4, 191.8; IR (neat) 3444, 2934, 2855, 1626, 1557  $\text{cm}^{-1}$ ; HRMS (FAB+)  $m/z$  calc'd for  $[\text{M}+\text{H}]^+ \text{C}_{10}\text{H}_{16}\text{NO}$  : 166.1232, found 166.1234.

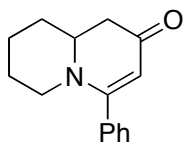

**16**

**4-Phenyl-7,8,9,9a-tetrahydro-1H-quinolizin-2(6H)-one (16).**  $^1\text{H}$  NMR (500 MHz,  $\text{CDCl}_3$ )  $\square$  1.46-1.50 (m, 2H), 1.56-1.60 (m, 1H), 1.75-1.80 (m, 2H), 1.88-1.98 (m, 1H), 2.47 (dd,  $J = 16$  Hz, 11 Hz, 1H), 2.60-2.66 (m, 2H), 3.50-3.58 (m, 2H), 5.09 (s, 1H), 7.28-7.46 (m, 5H);  $^{13}\text{C}$  NMR (100 MHz,  $\text{CDCl}_3$ )  $\square$  23.8, 25.9, 31.3, 42.6, 50.3, 58.6,

103.3, 127.0, 128.5, 128.9, 136.7, 165.9, 191.5; IR (neat) 2932, 2853, 1640, 1541  $\text{cm}^{-1}$ ;  
HRMS (FAB+)  $m/z$  calc'd for  $[\text{M}+\text{H}]^+$   $\text{C}_{15}\text{H}_{18}\text{NO}$  : 228.1388, found 228.1400.

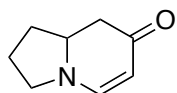

17

**2,3,8,8a-Tetrahydroindolizin-7(1H)-one (17).**  $^1\text{H}$  NMR (400 MHz,  $\text{CDCl}_3$ )  $\delta$  1.61-1.70 (m, 1H), 1.86-1.95 (m, 1H), 2.05-2.10 (m, 1H), 2.21-2.44 (m, 3H), 3.42-3.54 (m, 2H), 3.66-3.76 (m, 1H), 4.91 (d,  $J = 7$  Hz, 1H), 7.19 (d,  $J = 7$  Hz, 1H);  $^{13}\text{C}$  NMR (100 MHz,  $\text{CDCl}_3$ )  $\delta$  24.8, 33.2, 41.9, 49.7, 58.5, 97.5, 150.4, 192.5; IR (neat) 3423, 297, 2879, 1617, 1559  $\text{cm}^{-1}$ ; HRMS (FAB+)  $m/z$  calc'd for  $[\text{M}+\text{H}]^+$   $\text{C}_8\text{H}_{12}\text{NO}$  : 138.1901, found 138.0911.

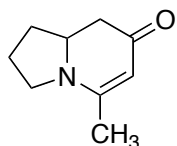

18

**5-Methyl-2,3,8,8a-tetrahydroindolizin-7(1H)-one (18).**  $^1\text{H}$  NMR (400 MHz,  $\text{CDCl}_3$ )  $\delta$  1.61-1.70 (m, 1H), 1.82-1.95 (m, 1H), 2.01 (s, 3H), 2.05-2.10 (m, 1H), 2.21-2.42 (m, 3H), 3.42-3.47 (m, 1H), 3.52-3.57 (m, 1H), 3.70-3.80 (m, 1H), 4.92 (s, 1H);  $^{13}\text{C}$  NMR (100 MHz,  $\text{CDCl}_3$ )  $\delta$  20.9, 24.0, 33.1, 41.6, 47.3, 59.3, 98.4, 161.2, 191.7; IR (neat) 3397, 2918, 1597, 1531  $\text{cm}^{-1}$ ; HRMS (ES+)  $m/z$  calc'd for  $[\text{M}+\text{H}]^+$   $\text{C}_9\text{H}_{14}\text{NO}$  : 152.1075, found 152.1093.

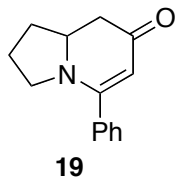

**5-Phenyl-2,3,8,8a-tetrahydroindolizin-7(1H)-one (19).**  $^1\text{H}$  NMR (400 MHz,  $\text{CDCl}_3$ )  $\square$  1.75-1.85 (m, 1H), 1.85-2.00 (m, 1H), 2.01-2.09 (m, 1H), 2.30-2.40 (m, 1H), 2.41-2.54 (m, 2H), 3.27-3.31 (m, 1H), 3.48-3.52 (m, 1H), 4.04-4.07 (m, 1H), 5.10, (s, 1H), 7.38-7.45 (m, 5H);  $^{13}\text{C}$  NMR (100 MHz,  $\text{CDCl}_3$ )  $\square$  24.9, 32.4, 41.9, 49.7, 59.3, 100.4, 128.0, 128.9, 130.2, 136.6, 163.3, 192.4; IR (neat) 3427, 2964, 2877, 1611, 1518, 1471  $\text{cm}^{-1}$ ; HRMS (ES+)  $m/z$  calc'd for  $[\text{M}+\text{H}]^+$   $\text{C}_{14}\text{H}_{16}\text{NO}$  : 214.1232, found 214.1227.

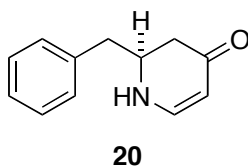

**(S)-2-Benzyl-2,3-dihydropyridin-4(1H)-one (20).** Spectral data was identical to the reported values:  $[\alpha]_{\text{D}}^{22}$   $-150$ , ( $c = 0.65$ ,  $\text{CHCl}_3$ ); literature value = :  $[\alpha]_{\text{D}}^{22}$   $-151$ , ( $c = 0.225$ ,  $\text{CHCl}_3$ ).<sup>2</sup>

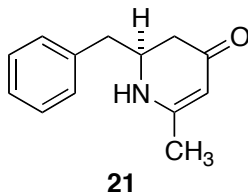

**(S)-2-Benzyl-6-methyl-2,3-dihydropyridin-4(1H)-one (21).**  $^1\text{H}$  NMR (400 MHz,  $\text{CDCl}_3$ )  $\square$  1.92 (s, 3H), 2.36 (dd,  $J = 16$  Hz, 11.5 Hz, 1H), 2.48 (dd,  $J = 16$  Hz, 5 Hz, 1H), 2.84-2.93 (m, 2H), 3.81-3.85 (m, 1H), 4.82 (s, 1H), 4.98 (s, 1H), 7.19-7.38 (m, 5H);  $^{13}\text{C}$

NMR (100 MHz, CDCl<sub>3</sub>)  $\delta$  21.6, 40.8, 41.7, 54.7, 100.1, 127.5, 129.4, 129.6, 137.3, 161.2, 191.6; IR (neat) 3244, 1608, 1597, 1531 cm<sup>-1</sup>; HRMS (FAB+)  $m/z$  calc'd for [M+H]<sup>+</sup> C<sub>13</sub>H<sub>16</sub>NO : 202.1232, found 202.1234;  $[\alpha]_D^{22}$  -190 ( $c$  = 1.6, CHCl<sub>3</sub>).

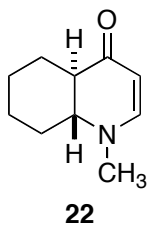

**(trans)-1-Methyl-4a,5,6,7,8,8a-hexahydroquinolin-4(1H)-one (22).** <sup>1</sup>H NMR (500 MHz, CDCl<sub>3</sub>)  $\delta$  0.95-1.04 (m, 1H), 1.10-1.28 (m, 2H), 1.30-1.39 (m, 1H), 1.70-1.85 (m, 2H), 2.00-2.08 (m, 1H), 2.13-2.15 (m, 1H), 2.32-2.35 (m, 1H), 2.89 (s, 3H), 2.92-3.06 (m, 1H) 4.96 (d,  $J$  = 7 Hz, 1H), 6.98 (d,  $J$  = 7 Hz, 1H); <sup>13</sup>C NMR (100 MHz, CDCl<sub>3</sub>)  $\delta$  23.5, 23.8, 24.0, 29.2, 38.5, 47.4, 61.1, 97.3, 154.2, 193.0; IR (neat) 3417, 2924, 2856, 1634, 1590, 1191 cm<sup>-1</sup>; HRMS (ES+)  $m/z$  calc'd for [M+H]<sup>+</sup> C<sub>10</sub>H<sub>16</sub>NO : 166.1232, found 166.1235.

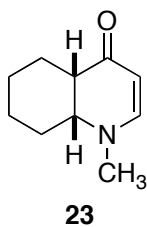

**(cis)-1-Methyl-4a,5,6,7,8,8a-hexahydroquinolin-4(1H)-one (23).** <sup>1</sup>H NMR (500 MHz, CDCl<sub>3</sub>)  $\delta$  1.23-1.32 (m, 2H), 1.37-1.42 (m, 2H), 1.50-1.57 (m, 1H), 1.57-1.66 (m, 1H), 1.77-1.87 (m, 1H), 2.10-2.18 (m, 1H), 2.56-2.64 (m, 1H), 2.99 (s, 3H), 3.30-3.38 (m, 1H), 4.87 (d,  $J$  = 7 Hz, 1H), 6.83 (d,  $J$  = 7 Hz, 1H); <sup>13</sup>C NMR (100 MHz, CDCl<sub>3</sub>)  $\delta$  22.8,

23.8, 24.3, 29.0, 30.6, 45.0, 60.1, 96.7, 153.6, 192.0; IR (neat) 2930, 2855, 1631, 1590, 1207  $\text{cm}^{-1}$ ; HRMS (ES+)  $m/z$  calc'd for  $[\text{M}+\text{H}]^+$   $\text{C}_{10}\text{H}_{16}\text{NO}$  : 166.1232, found 166.1227.

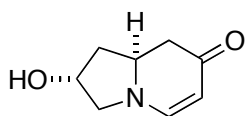

**24**

**(2R,8aS)-2-Hydroxy-2,3,8,8a-tetrahydroindolizin-7(1H)-one (24).**  $^1\text{H}$  NMR (400 MHz,  $\text{CDCl}_3$ )  $\square$  1.84 (ddd,  $J = 15.5$  Hz, 11.3 Hz, 4.2 Hz, 1H), 2.03 (dd,  $J = 12.9$  Hz, 5.6 Hz, 1H), 2.36 (dd,  $J = 16.3$  Hz, 16.3 Hz), 1H), 2.47 (dd,  $J = 16.1$  Hz, 5.1 Hz, 1H), 3.00 (bs, 1H), 3.54 (d,  $J = 11.9$  Hz, 1H), 3.75 (dd,  $J = 11.9$  Hz, 4.4 Hz, 1H), 4.10-4.19 (m, 1H), 4.65 (t,  $J = 4.1$  Hz, 1H), 5.00 (d,  $J = 7$  Hz, 1H), 7.24 (d,  $J = 7$  Hz, 1H);  $^{13}\text{C}$  NMR (100 MHz,  $\text{CDCl}_3$ )  $\square$  41.3, 42.1, 56.4, 58.6, 70.3, 97.8, 151.2, 192.7; IR (neat) 3400, 1580  $\text{cm}^{-1}$ ; HRMS (ES+)  $m/z$  calc'd for  $[\text{M}+\text{H}]^+$   $\text{C}_8\text{H}_{12}\text{NO}_2$  : 154.0868, found 154.0853;  $[\alpha]_D^{22}$  -490 ( $c = 0.45$ ,  $\text{CHCl}_3$ ).

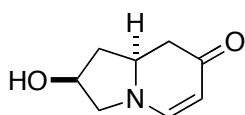

**25**

**(2R,8aR)-2-Hydroxy-2,3,8,8a-tetrahydroindolizin-7(1H)-one (ent-25).**  $^1\text{H}$  NMR (400 MHz,  $\text{D}_3\text{CCOCD}_3$ )  $\square$  1.74 (ddd,  $J = 15.5$  Hz, 9 Hz, 6.5 Hz, 1H), 2.05-2.08 (m, 1H), 2.22 (dd,  $J = 15.8$  Hz, 5 Hz, 1H), 2.38 (dd,  $J = 15.8$  Hz, 15.8 Hz, 1H), 2.51 (ddd,  $J = 6.4$  Hz, 12.6 Hz, 6.4 Hz, 1H), 3.36 (dd,  $J = 10.7$  Hz, 5.5 Hz, 1H), 3.69 (dd,  $J = 10.7$  Hz, 6.5 Hz, 1H), 3.74-3.81 (m, 1H), 4.50-4.56 (m, 1H), 4.75 (d,  $J = 7.4$  Hz, 1H), 7.30 (d  $J = 7.4$  Hz;  $^{13}\text{C}$  NMR (100 MHz,  $\text{D}_3\text{CCOCD}_3$ )  $\square$  41.4, 42.2, 57.0, 57.2, 70.0, 97.2, 150.1, 190.6; IR

(neat) 3320, 2871, 1614, 1560  $\text{cm}^{-1}$ ; HRMS (FAB+)  $m/z$  calc'd for  $[\text{M}+\text{H}]^+$   $\text{C}_8\text{H}_{12}\text{NO}_2$  : 154.0868, found 154.0862;  $[\square]^{22}_{\text{D}} +780$  ( $c = 0.90$ ,  $\text{CHCl}_3$ ).

**Additional Compounds (26, 29, 30):**

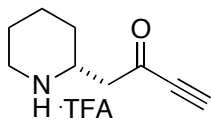

**26**

**(R)-1-(Piperidin-2-yl)but-3-yn-2-one 2,2,2-Trifluoroacetic Acid (26).**  $^1\text{H}$  NMR (400 MHz,  $\text{CHCl}_3$ )  $\square$  1.51-1.62 (m, 1H), 1.70 (dd,  $J = 24$  Hz, 12 Hz, 1H), 1.77-1.99 (m, 4H), 3.00 (dd,  $J = 18$  Hz, 6 Hz, 2H), 2.25 (bd,  $J = 18$  Hz, 1H), 3.38 (s, 1H), 3.45-3.57 (bm, 2H), 9.22 (bd,  $J = 70$  Hz, 2H-exchangable);  $^{13}\text{C}$  NMR (100 MHz,  $\text{CDCl}_3$ )  $\square$  22.5, 22.6, 28.7, 45.5, 48.1, 52.8, 81.0, 81.3, 183.2; IR (neat) 2958, 2097, 1678, 1203, 1136  $\text{cm}^{-1}$ ; HRMS (ES+)  $m/z$  calc'd for  $[\text{M}+\text{H}]^+$   $\text{C}_9\text{H}_{14}\text{NO}$ : 152.1075, found 152.1060.

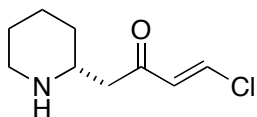

**29**

**(R,E)-4-Chloro-1-(piperidin-2-yl)but-3-en-2-one (29).**  $^1\text{H}$  NMR (400 MHz,  $\text{CD}_3\text{OD}$ )  $\square$  1.55-1.80 (m, 3H), 1.81-1.99 (m, 3H), 2.96-3.17 (m, 3H), 3.30-3.41 (m, 2H), 3.50-3.64 (m, 1H), 6.66 (d,  $J = 13.7$  Hz, 1H), 7.70 (d,  $J = 13.7$  Hz, 1H);  $^{13}\text{C}$  NMR (100 MHz,  $\text{CD}_3\text{OD}$ )  $\square$  22.0, 22.3, 42.9, 45.0, 52.9, 132.4, 139.2, 194.8; IR (neat) 3400, 2951, 1674, 1585  $\text{cm}^{-1}$ ; HRMS (FAB+)  $m/z$  calc'd for  $[\text{M}+\text{H}]^+$   $\text{C}_9\text{H}_{15}\text{NOCl}$  : 188.0842, found 188.0827;  $[\square]^{22}_{\text{D}} +22$  ( $c = 0.32$ ,  $\text{CHCl}_3$ ).



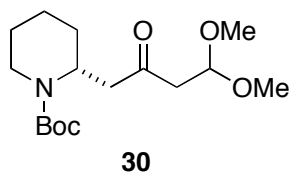

**(R)-tert-Butyl 2-(4,4-Dimethoxy-2-oxobutyl)piperidine-1-carboxylate (30).**  $^1\text{H}$  NMR (400 MHz,  $\text{CDCl}_3$ )  $\square$  1.38-1.68 (m, 6H), 1.46 (s, 9H), 2.63 (dd,  $J = 15$  Hz, 6.3 Hz, 1H), 2.72-2.79 (m, 4H), 3.36 (s, 6H), 3.99 (bs, 1H), 4.73 (bs, 1H), 4.77 (t,  $J = 5.6$  Hz, 1H);  $^{13}\text{C}$  NMR (100 MHz,  $\text{CDCl}_3$ )  $\square$  19.3, 25.7, 28.6, 28.8, 44.8, 47.0, 47.3, 54.2, 54.4, 80.0, 102.1, 155.2, 206.2; IR (neat) 3400, 2089, 1643  $\text{cm}^{-1}$ ; HRMS (ES+)  $m/z$  calc'd for  $[\text{M}+\text{H}]^+$   $\text{C}_{16}\text{H}_{30}\text{NO}_5$  : 316.2124, found 316.2118;  $[\alpha]_D^{22} +9.0$  ( $c = 0.50$ ,  $\text{CHCl}_3$ ).

#### References:

1. Comins, D. L.; LaMunyon, D. H. *J. Org. Chem.* **1992**, *57*, 5807-5809.
2. Comins, D. L.; Zhang, Y.; Joseph, S. P. *Org. Lett.* **1999**, *1*, 657-659.

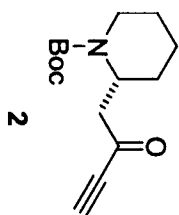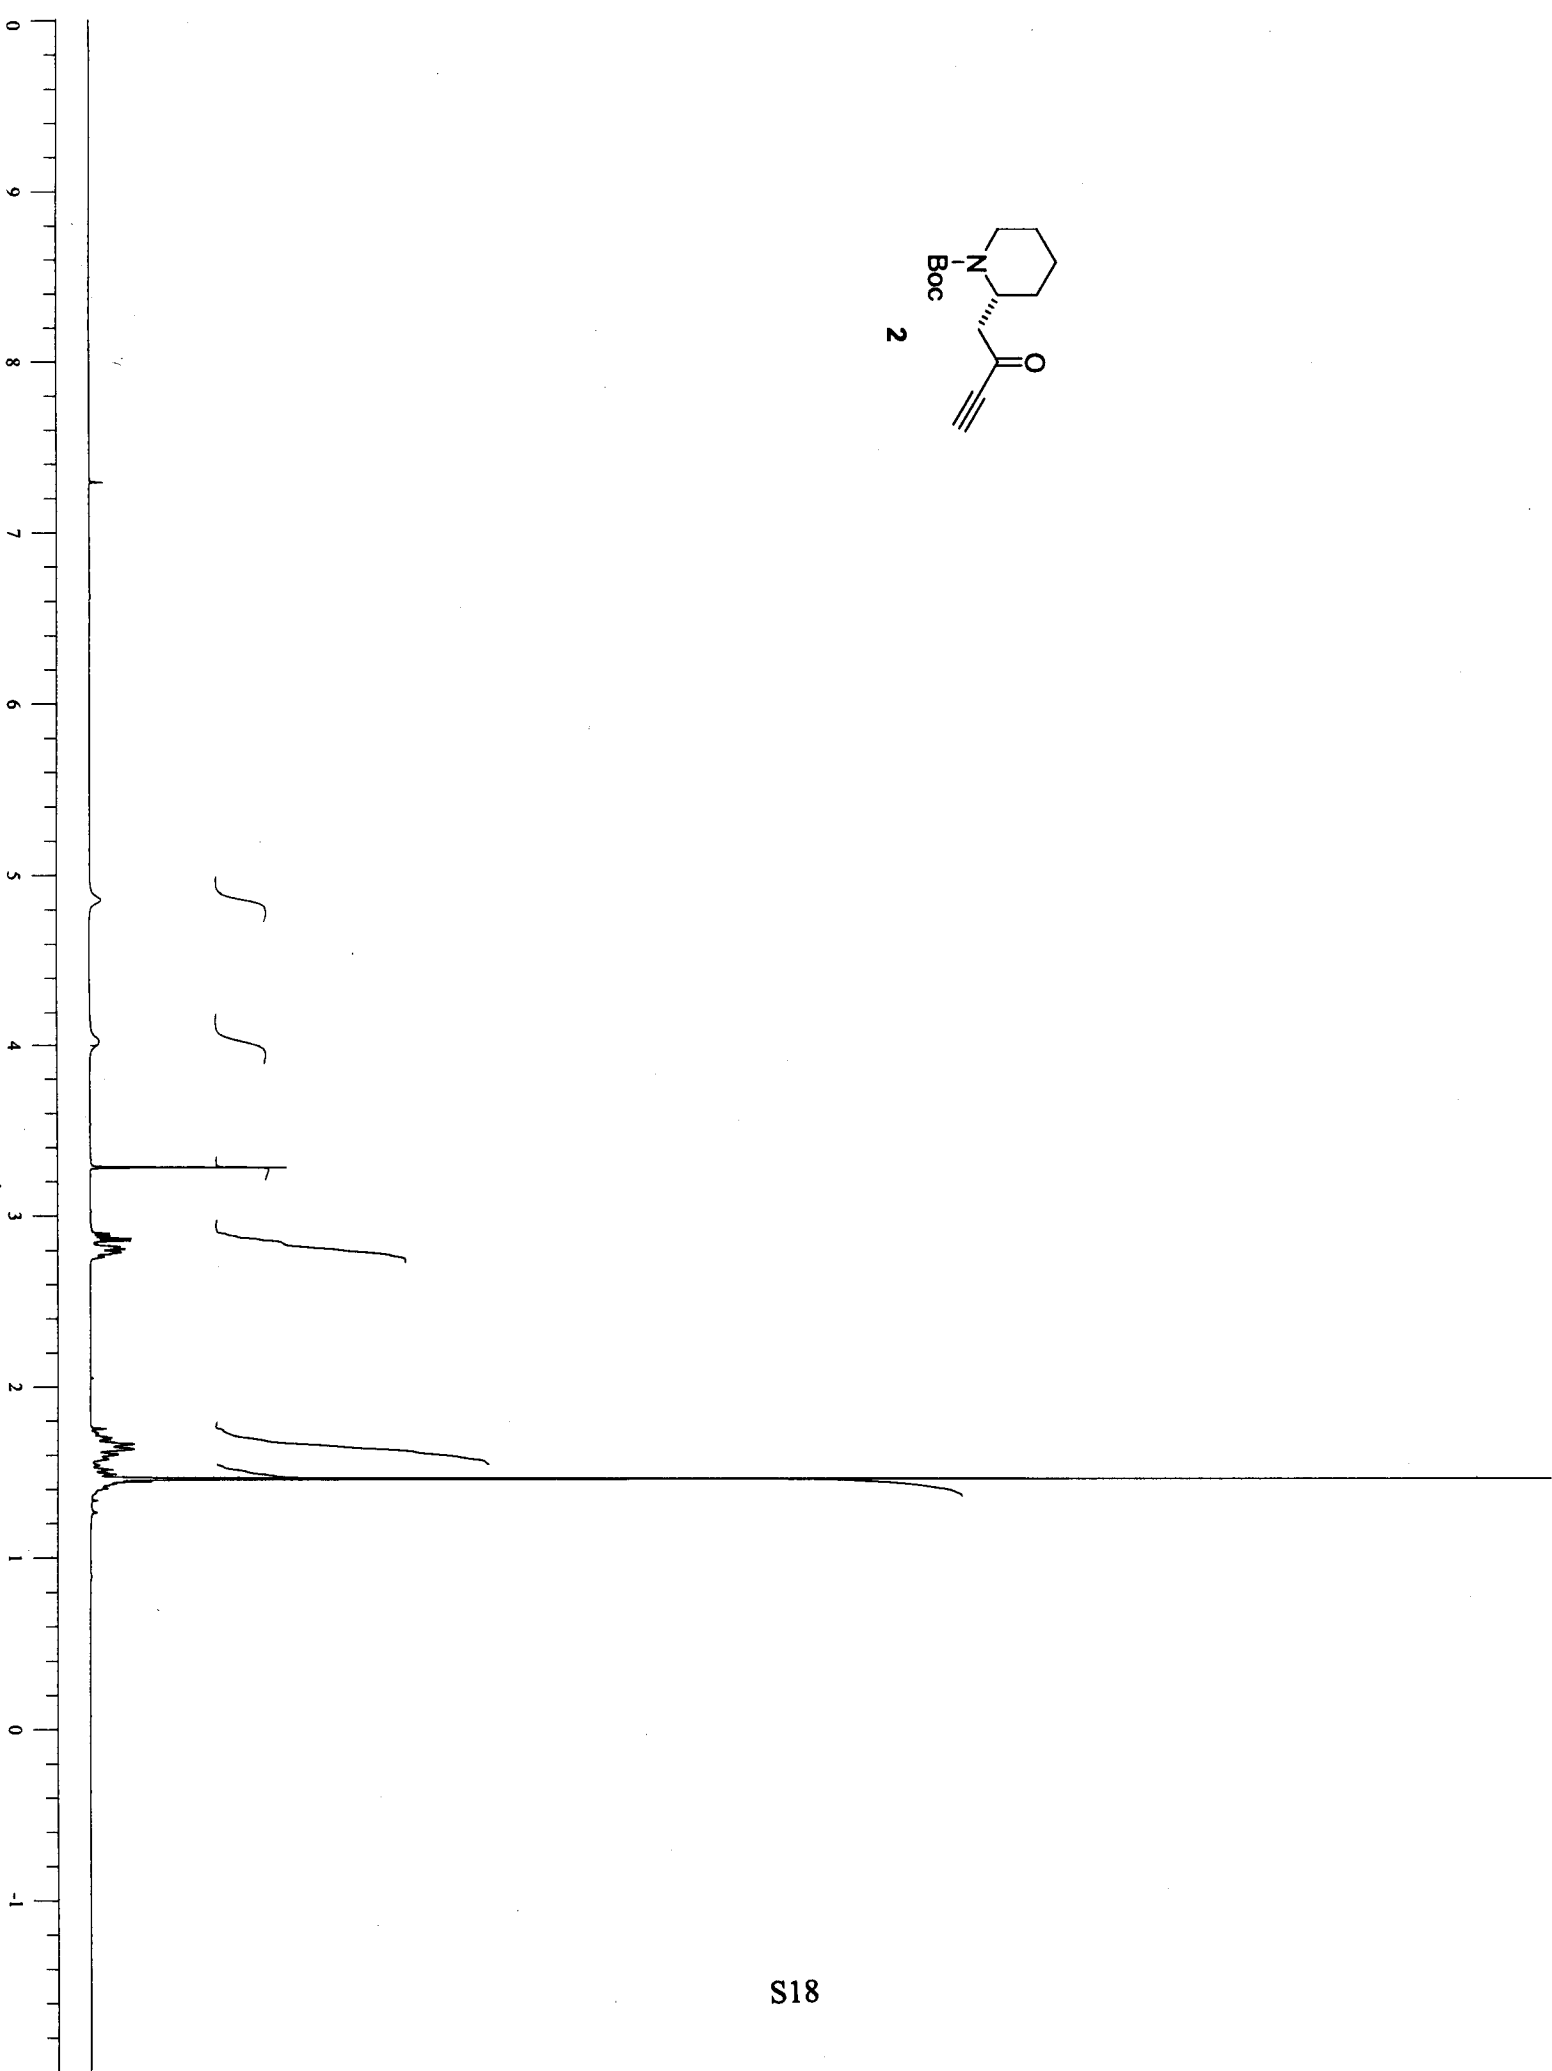

ppm

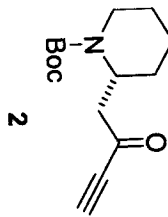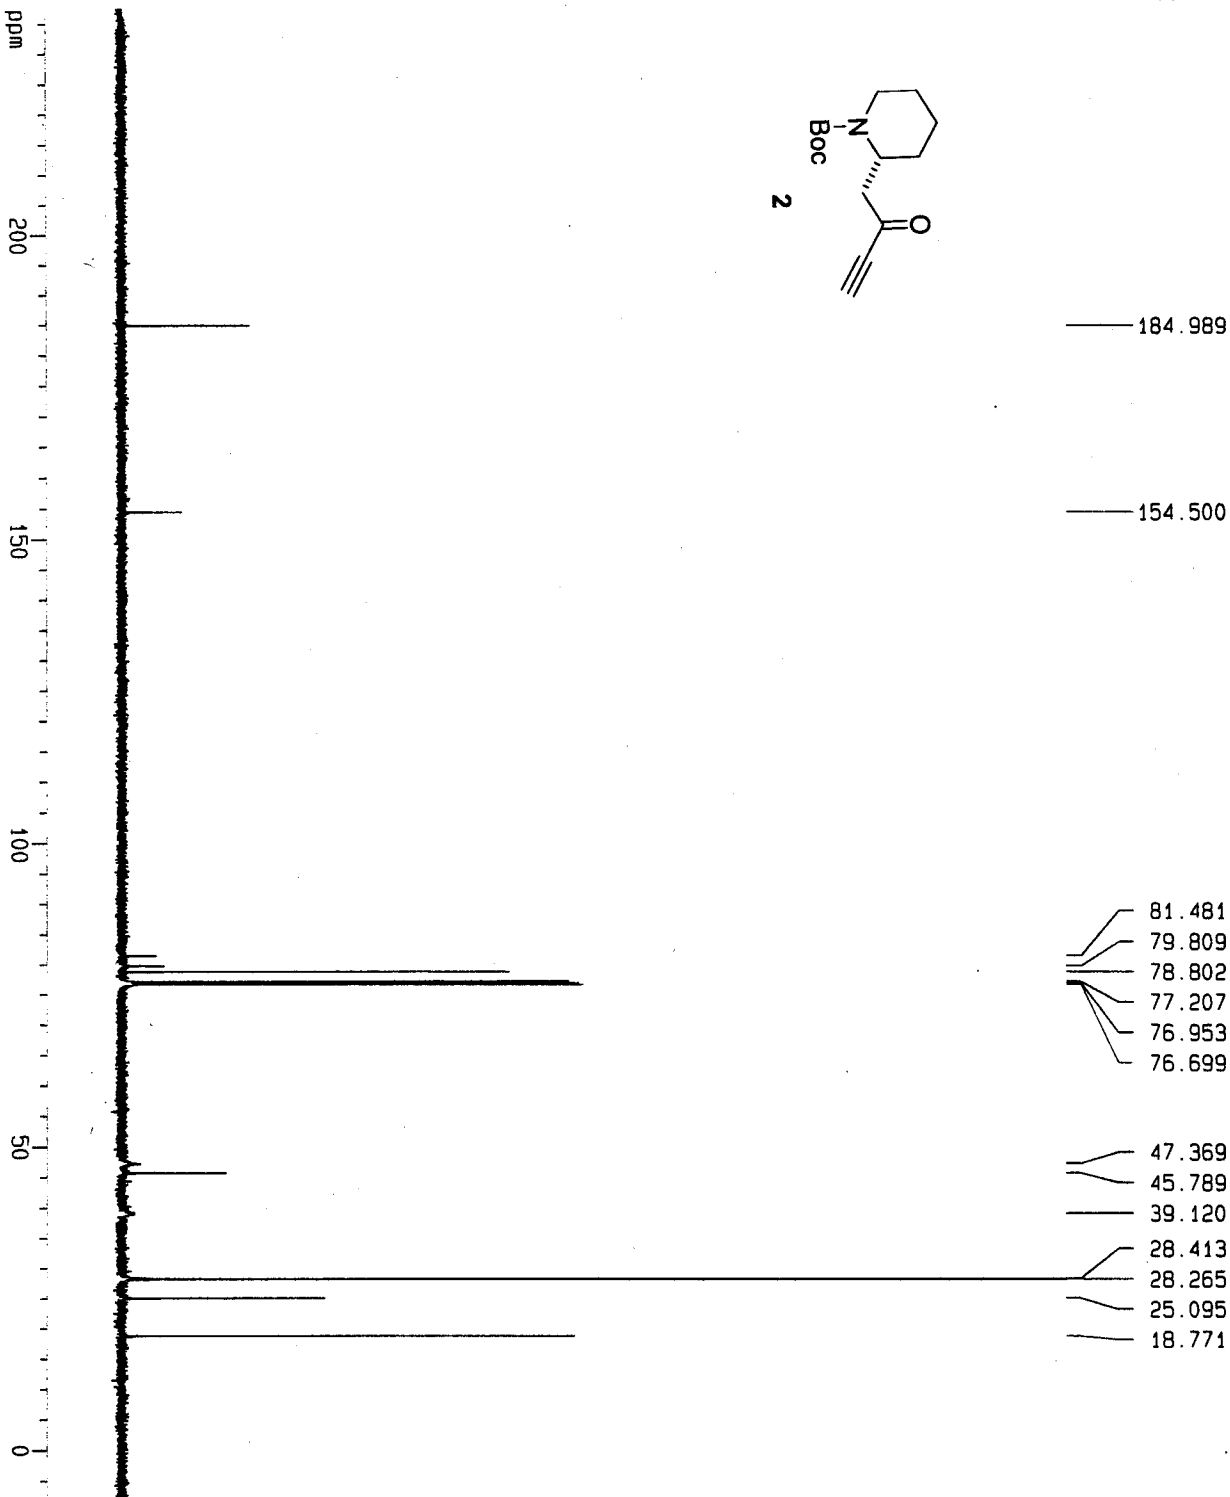

184.989  
154.500  
81.481  
79.809  
78.802  
77.207  
76.953  
76.699

47.369  
45.789  
39.120  
28.413  
28.265  
25.095  
18.771

## Current Data Parameters

NAME BU4-13c  
EXRNO 2  
PROCNO 1

## F2 - Acquisition Parameters

Date 20030930  
Time 12:59  
INSTRUM Spect  
PROBHD 5 mm BBO BB-1H  
PULPROG zgpg30  
TD 65536  
SOLVENT CDCl3  
NS 468  
DS 4

SMH 31446.541 Hz  
FLORES 0.479836 Hz  
AQ 1.0420883 sec

RG 2048  
DM 15.900 usec  
DE 6.00 usec  
TE 300.0 K

D1 0.10000000 sec  
d11 0.03000000 sec  
d12 0.00002000 sec

## \*\*\*\*\* CHANNEL f1 \*\*\*\*\*

NUC1 13C  
P1 6.50 usec  
PL1 5.00 dB  
SF01 125.7719472 MHz

## \*\*\*\*\* CHANNEL f2 \*\*\*\*\*

CHPROG2 waltz16  
NUC2 1H  
PCPRG2 95.00 usec  
PL2 -4.00 dB  
PL12 19.00 dB  
PL13 30.00 dB  
SF02 500.1325000 MHz

## F2 - Processing parameters

S1 65536  
SF 125.7578008 MHz  
MOM EM  
SSB 0  
LB 1.00 Hz  
GB 0  
PC 1.40

## F1 - Processing parameters

S1 1024  
MC2 OF  
SF 500.1300000 MHz  
MOM no  
SSB 0  
LB 0.30 Hz  
GB 0

## 1D NMR pilot parameters

CK 20.00 cm  
CY 0.00 cm  
F1P 242.577 pipe  
F1 30498.43 Hz  
F2P 7.539 pipe  
F2 -948.11 Hz  
PRMCM 1E 50262 DMV/CT  
H7CM 1572.32703 V/CM

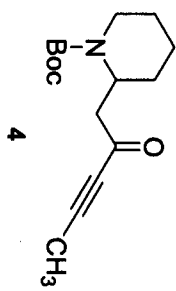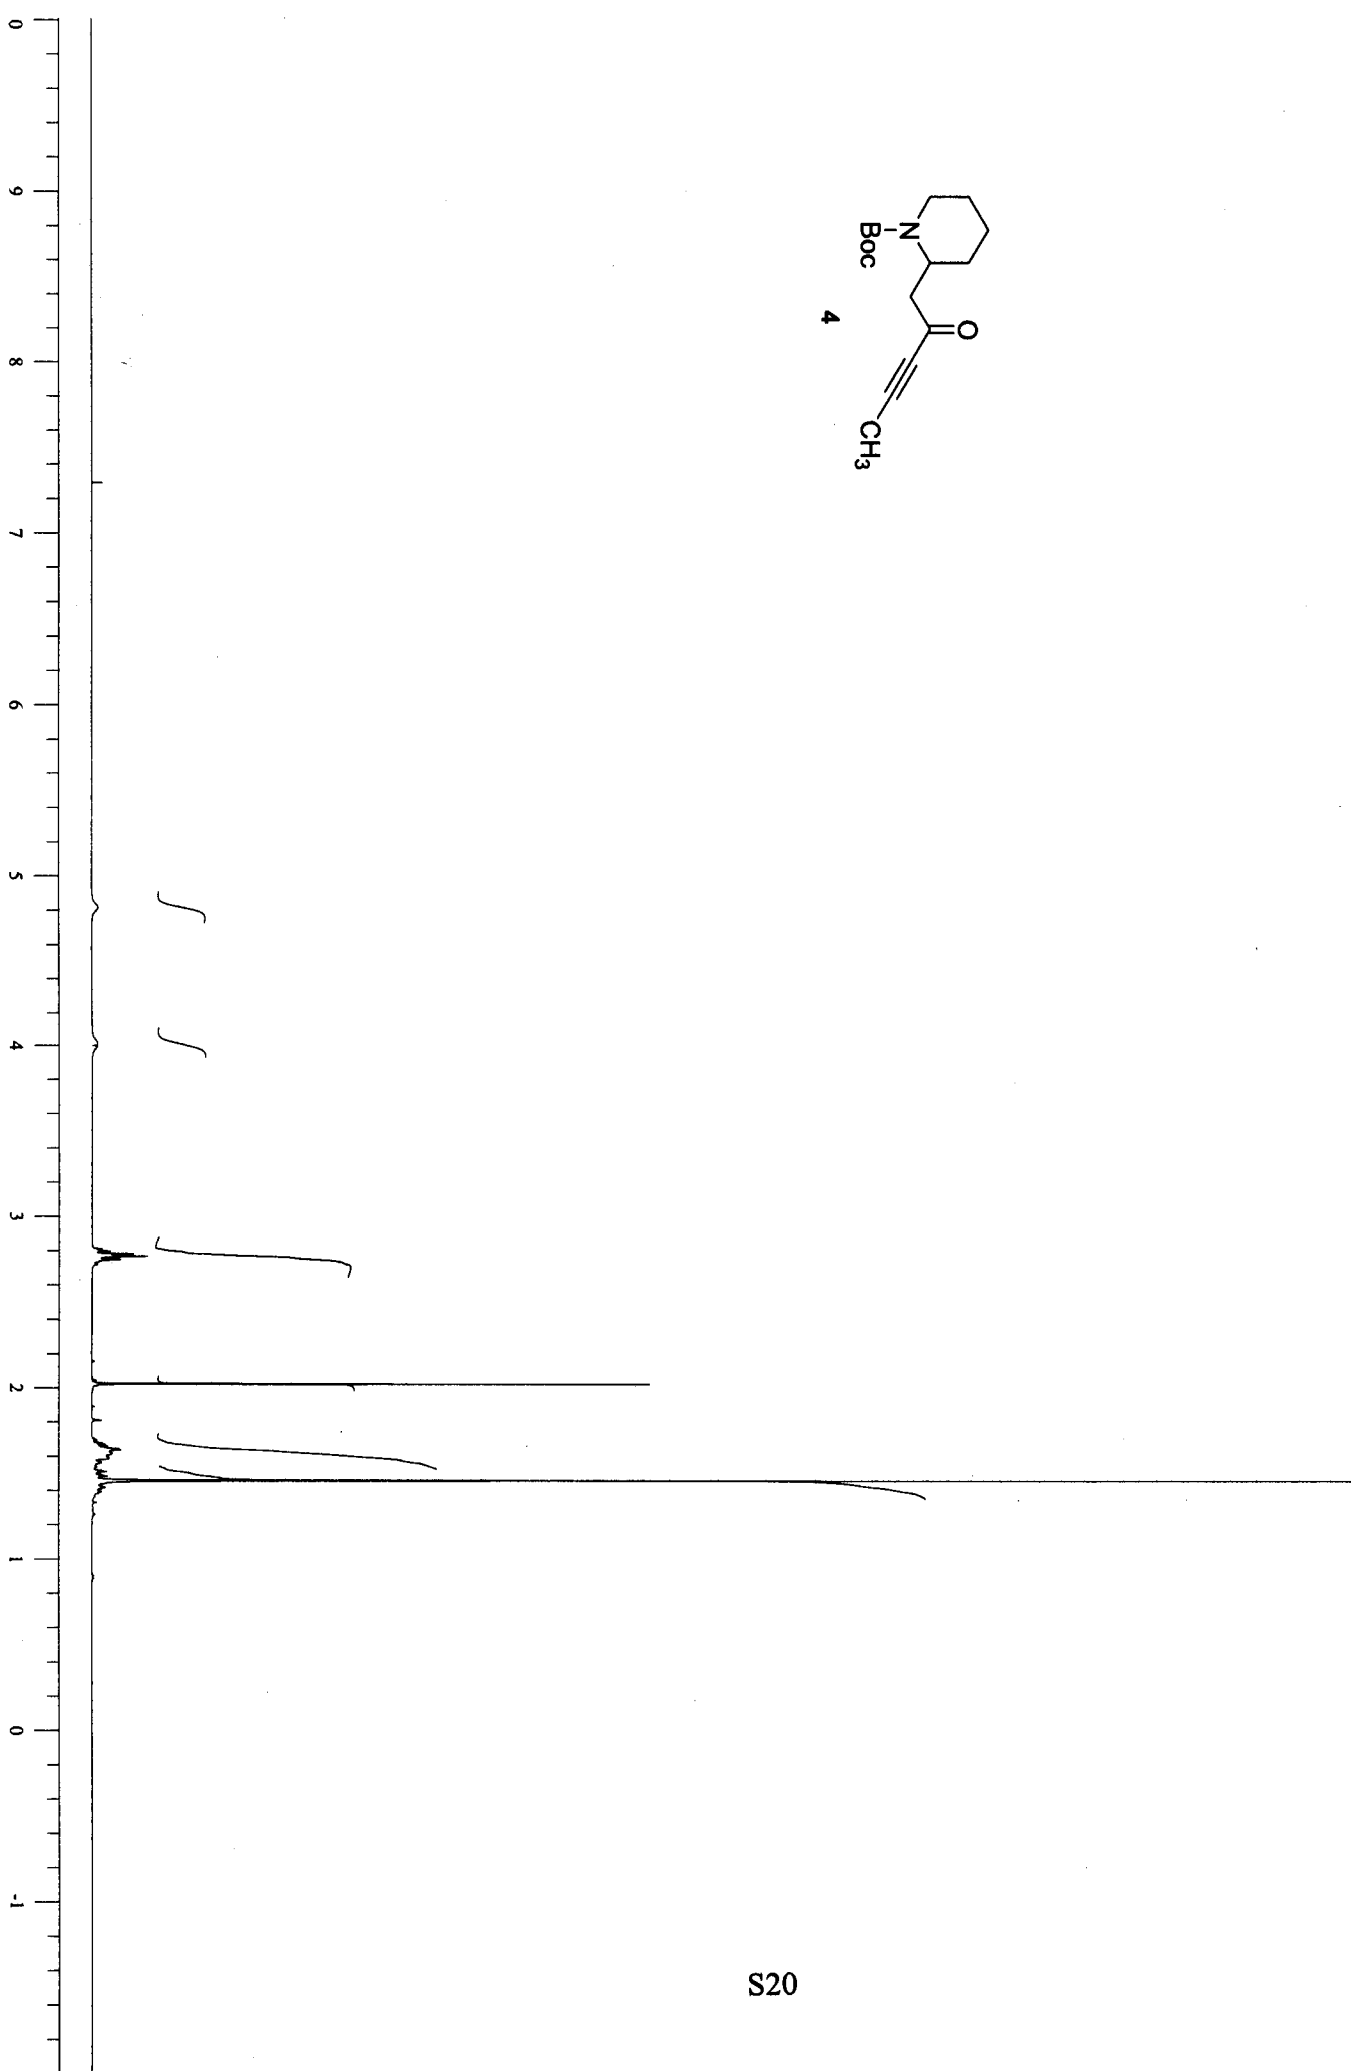

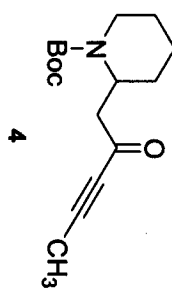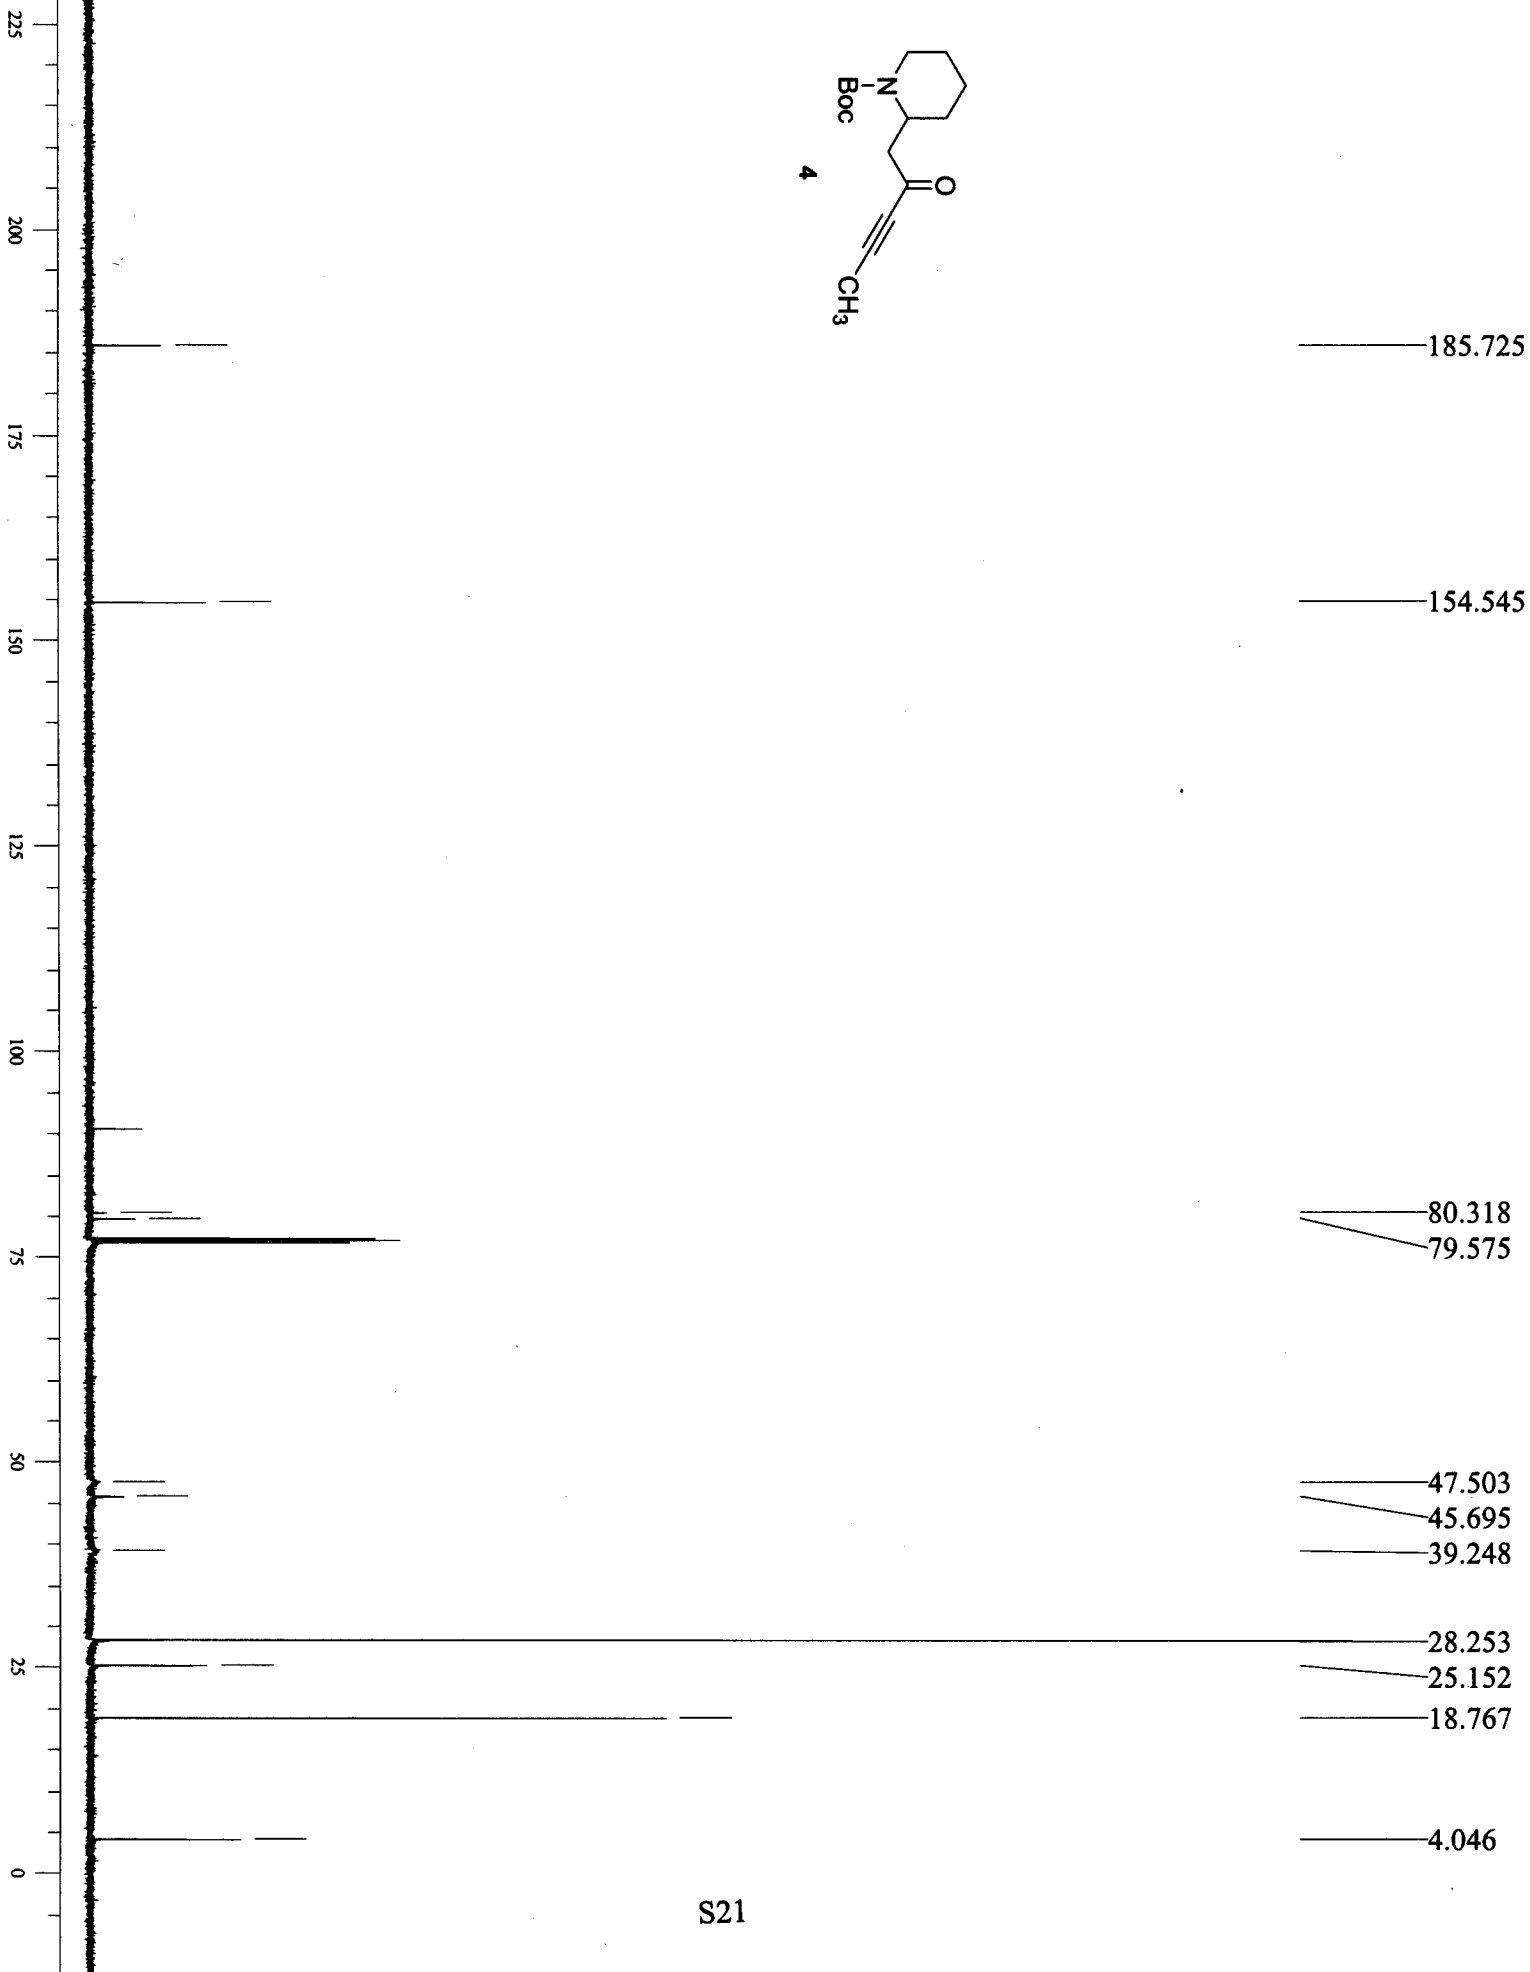

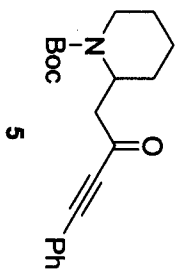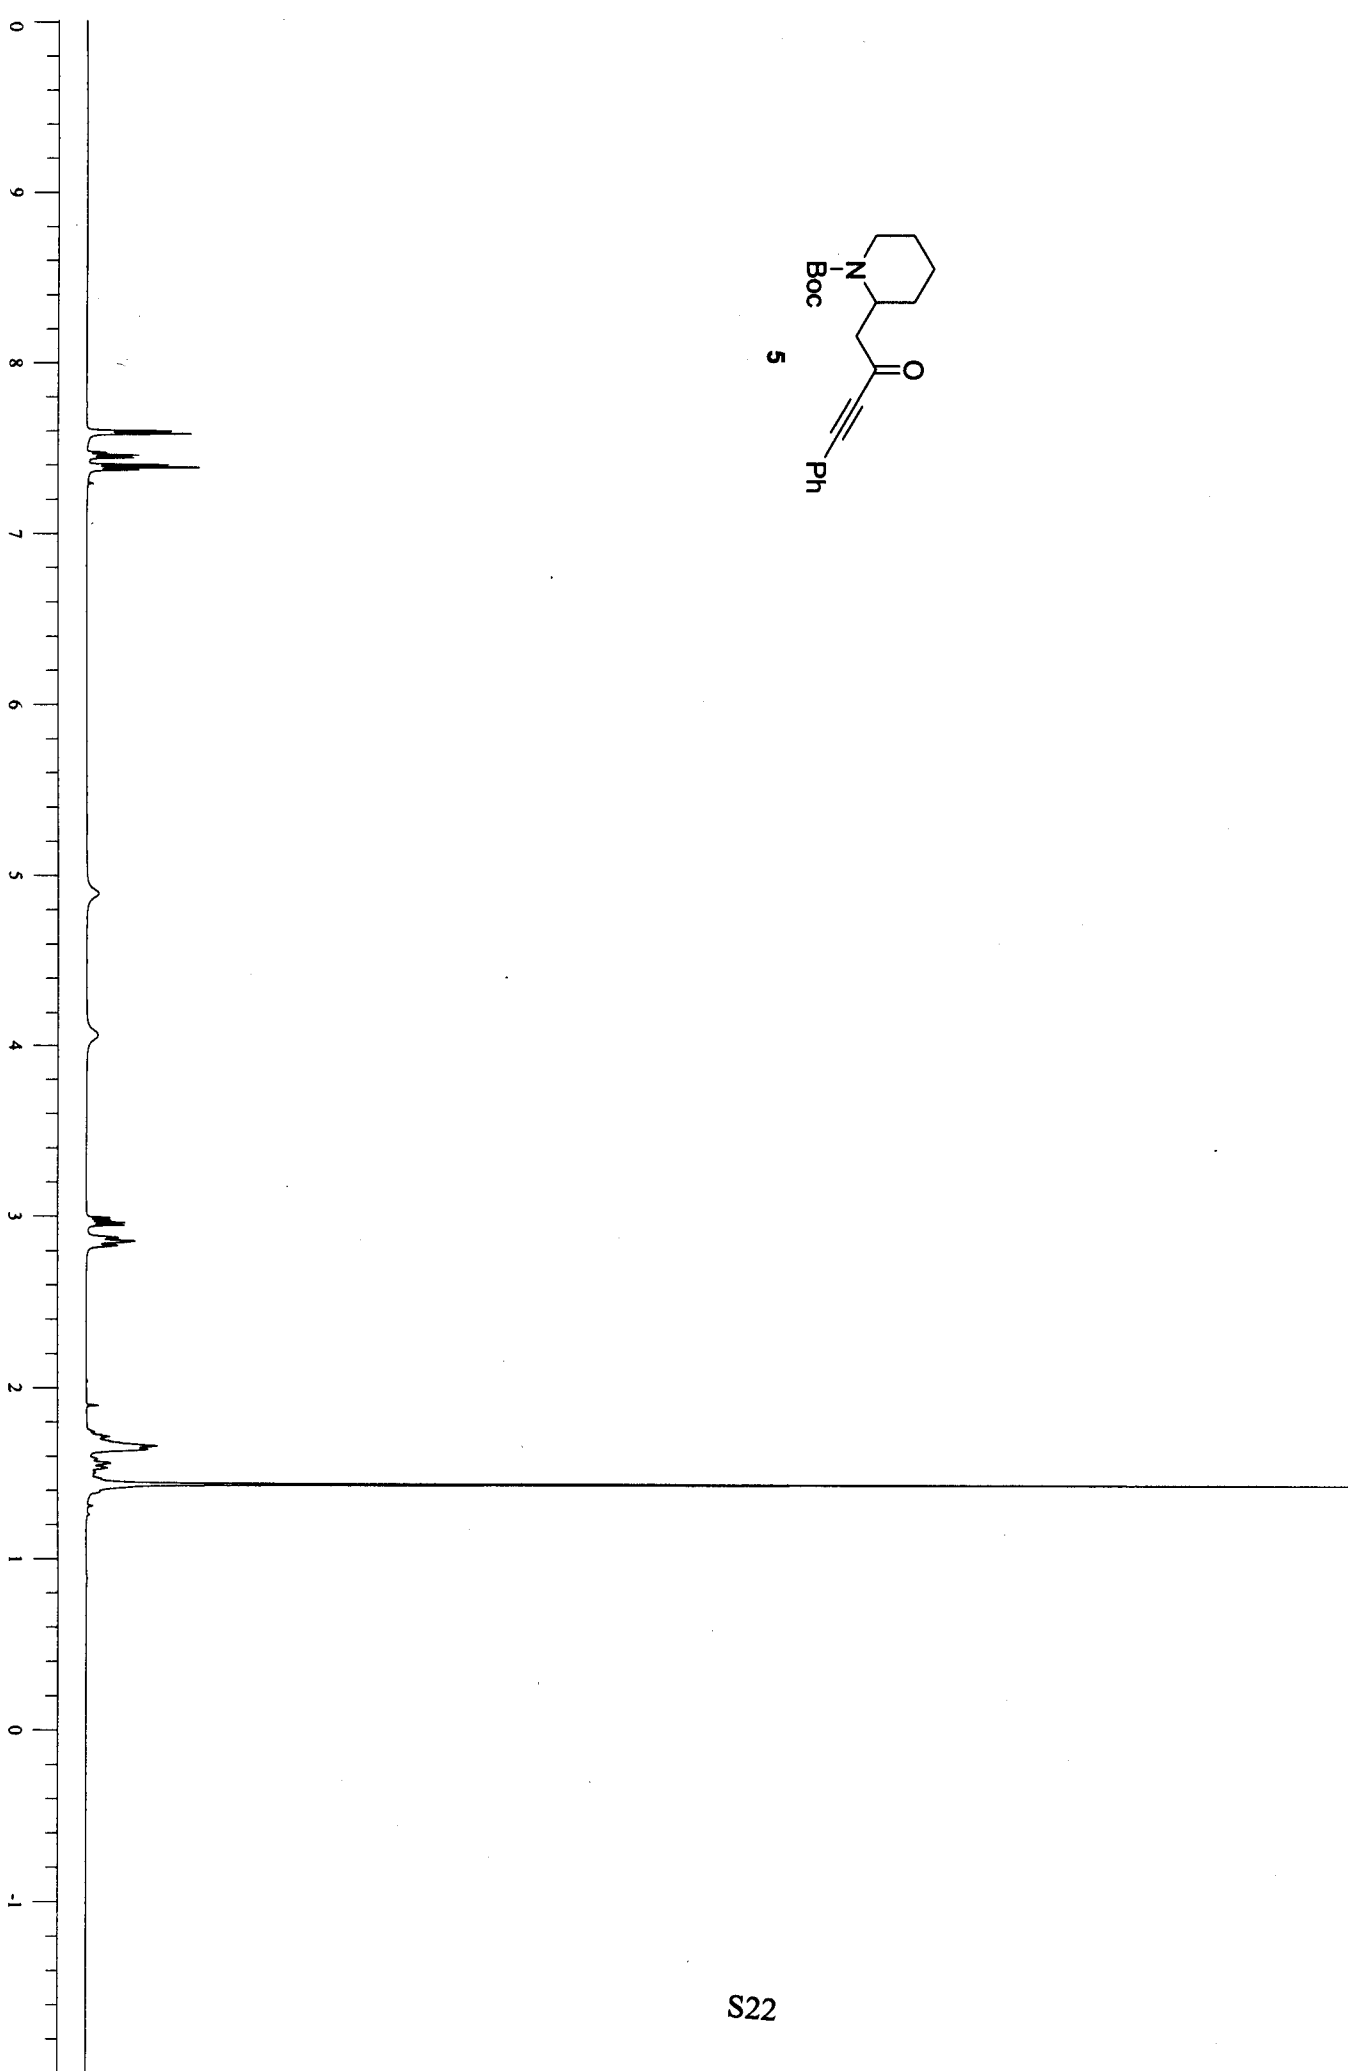

225  
200  
175  
150  
125  
100  
75  
50  
25  
0

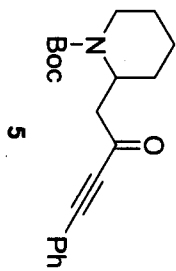

185.618  
154.537  
133.003  
130.637  
128.516  
119.823  
91.024  
88.011  
79.668  
53.366  
47.696  
45.818  
39.134  
28.253  
25.183  
18.850

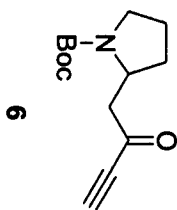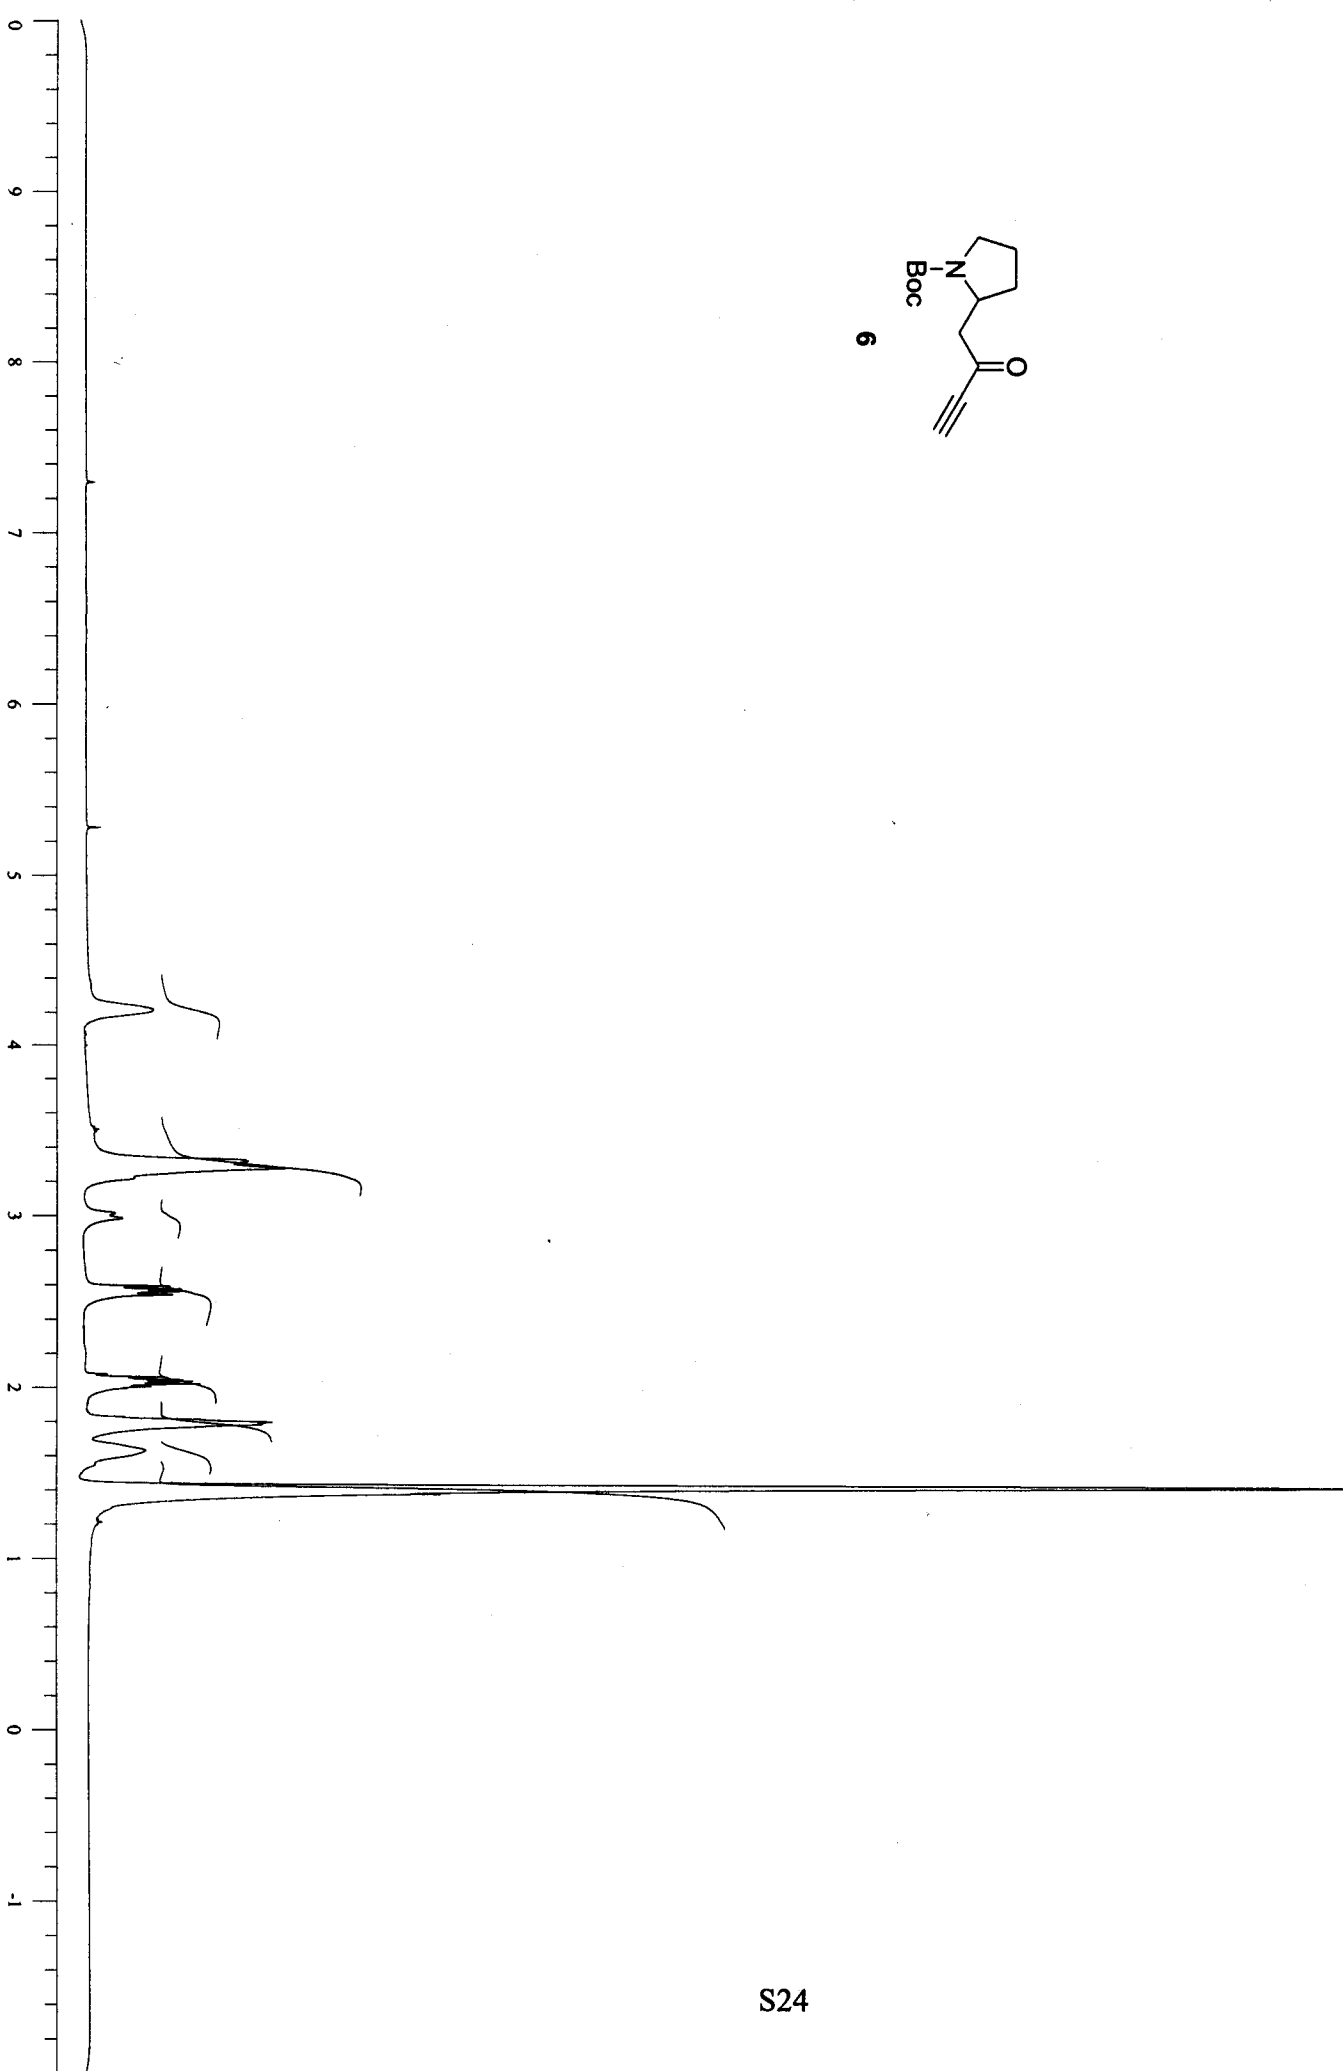



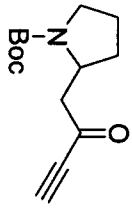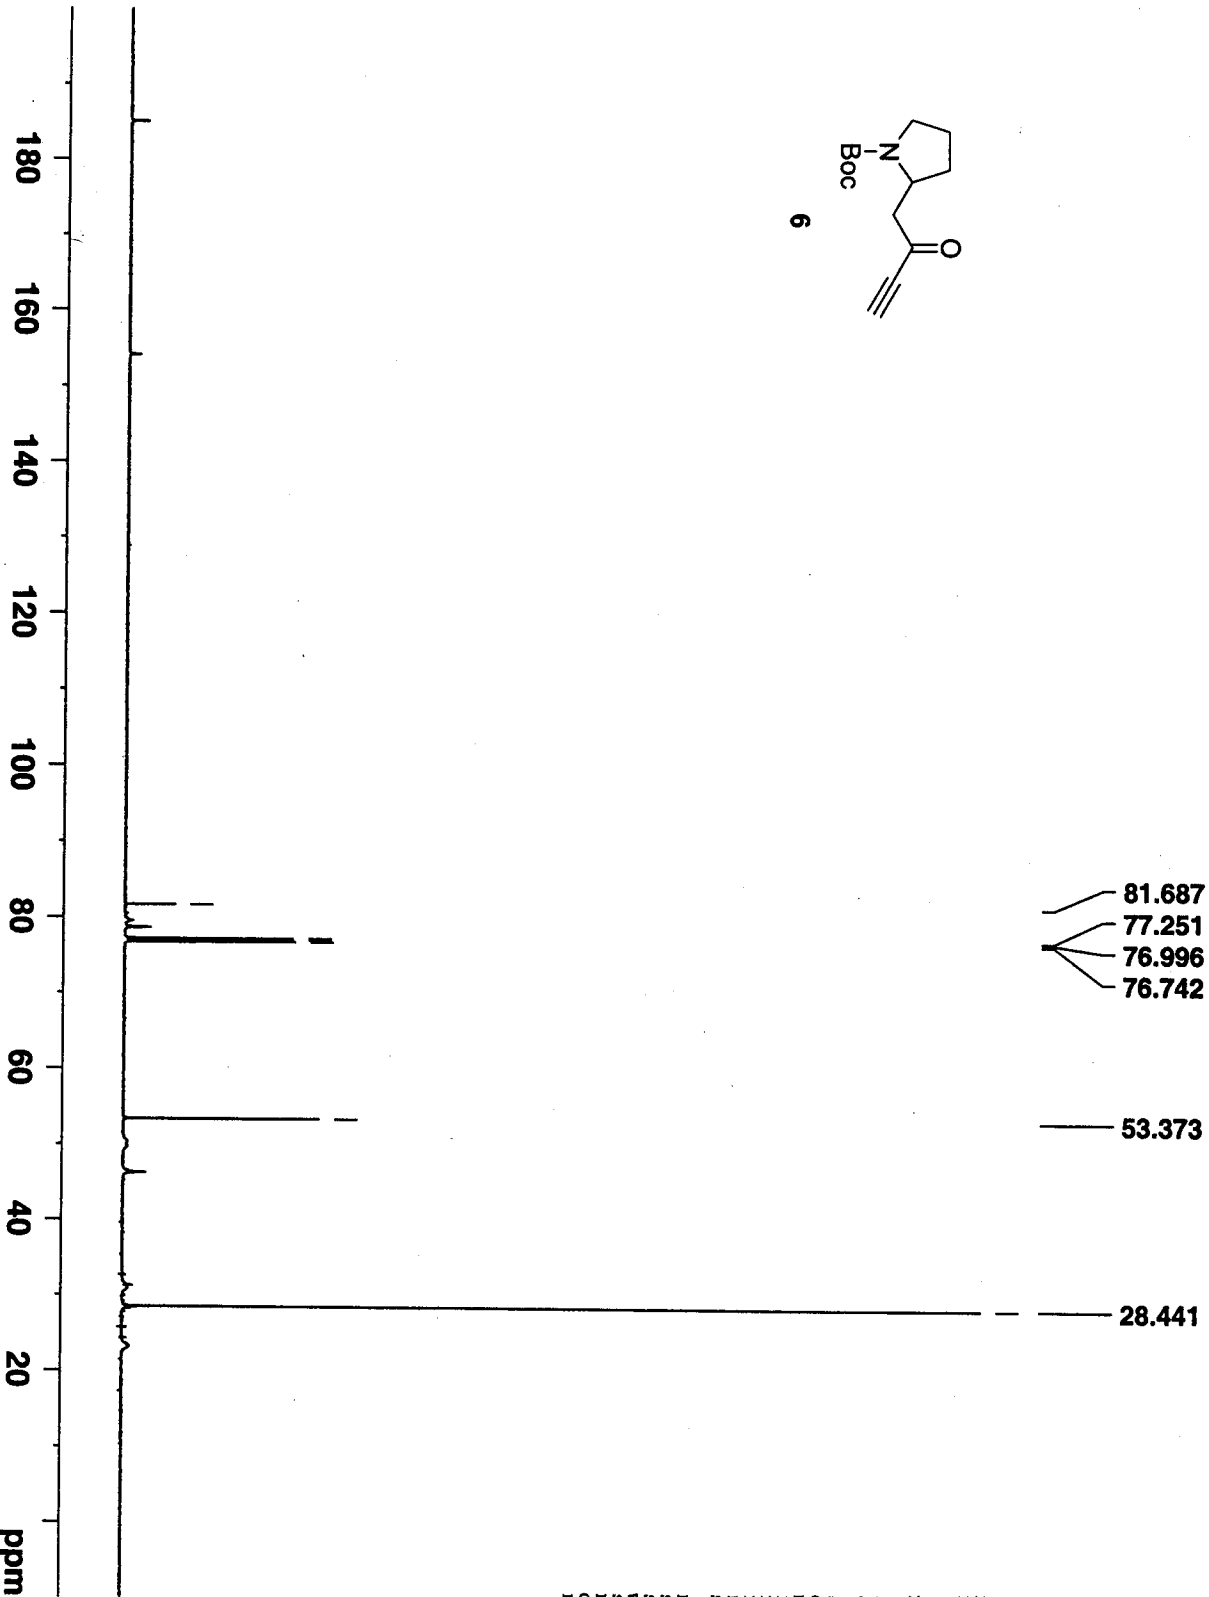

Current Data Parameters  
 NAME bjt-4-191  
 EXPNO 2  
 PROCNO 1

F2 - Acquisition Parameters

Date\_ 20050917  
 Time 12.46  
 INSTRUM 5 mm BBO BB-1H  
 PROBD 289430  
 PULPROG zgpg30  
 TD 65536  
 SOLTVENT CDCl3  
 NS 1600  
 DS 4  
 SMT 31446.541 Hz  
 FIDRES 0.479836 Hz  
 AQ 1.042083 sec  
 RG 8192  
 DW 15.900 usec  
 DE 6.00 usec  
 TE 323.0 K  
 D1 0.15000001 sec  
 d11 0.03000000 sec  
 DELTA 0.05000000 sec  
 HCRST 0.00000000 sec  
 MCWK 0.01500000 sec

==== CHANNEL F1 =====  
 NUC1 13C  
 P1 6.50 usec  
 PL1 3.00 dB  
 SFO1 125.7697360 MHz

==== CHANNEL F2 =====  
 CPDPRG2 waltz16  
 NUC2 1H  
 PCPD2 95.00 usec  
 PL2 -4.00 dB  
 PL12 19.00 dB  
 PL13 30.00 dB  
 SFO2 500.1325000 MHz

F2 - Processing parameters  
 SI 65536  
 SF 125.7577890 MHz  
 NDM 0  
 NSB 0  
 LB 1.00 Hz  
 GB 0  
 PC 1.40

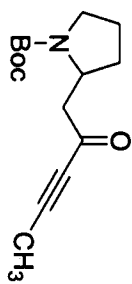

7

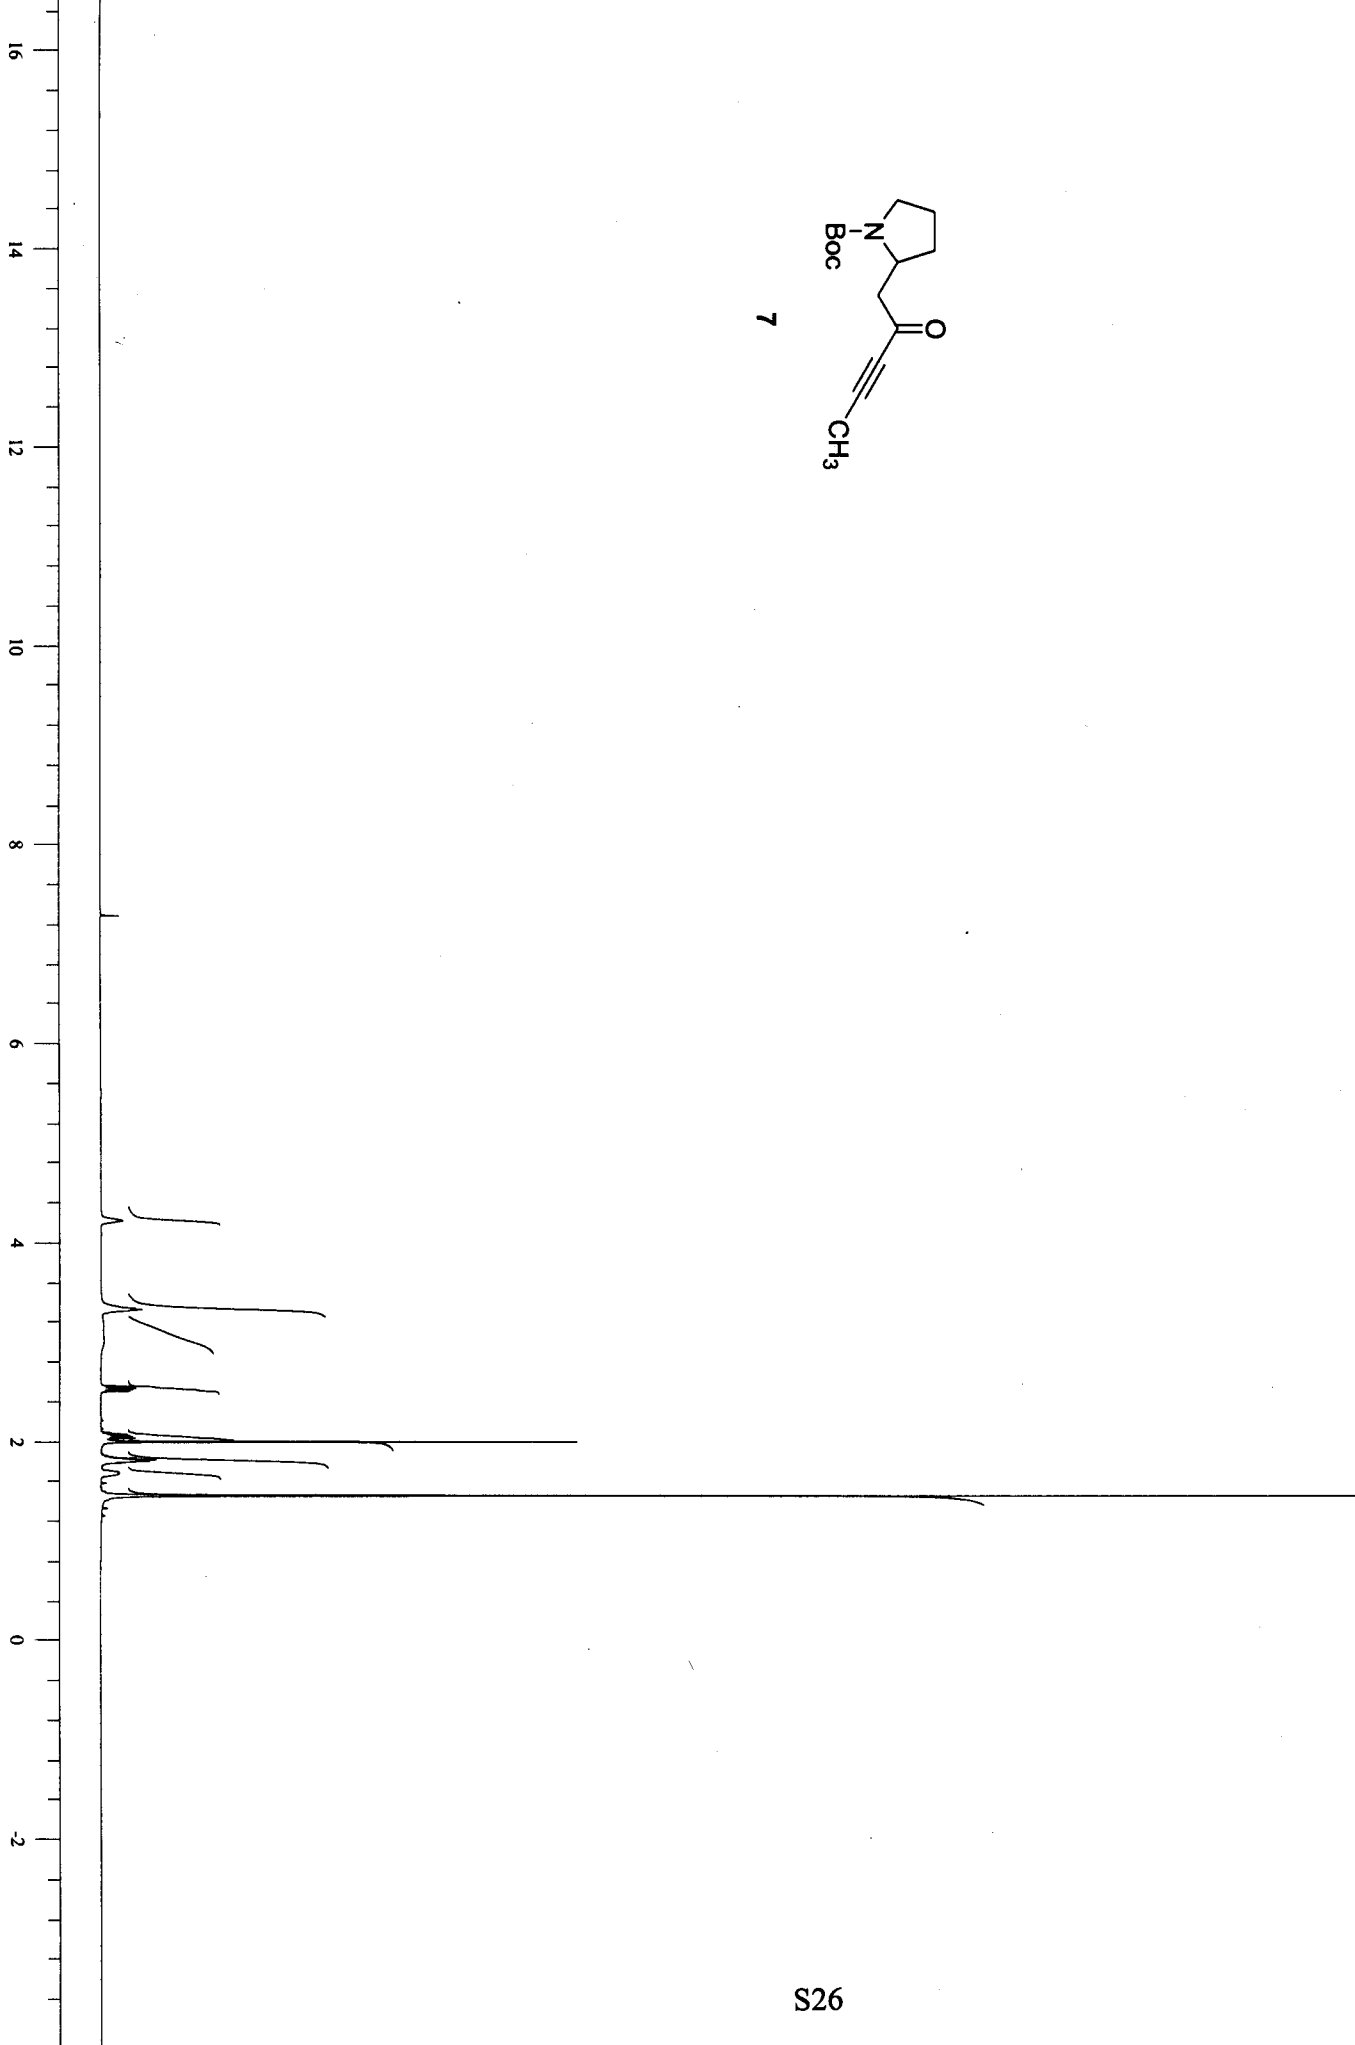

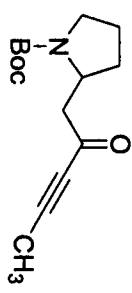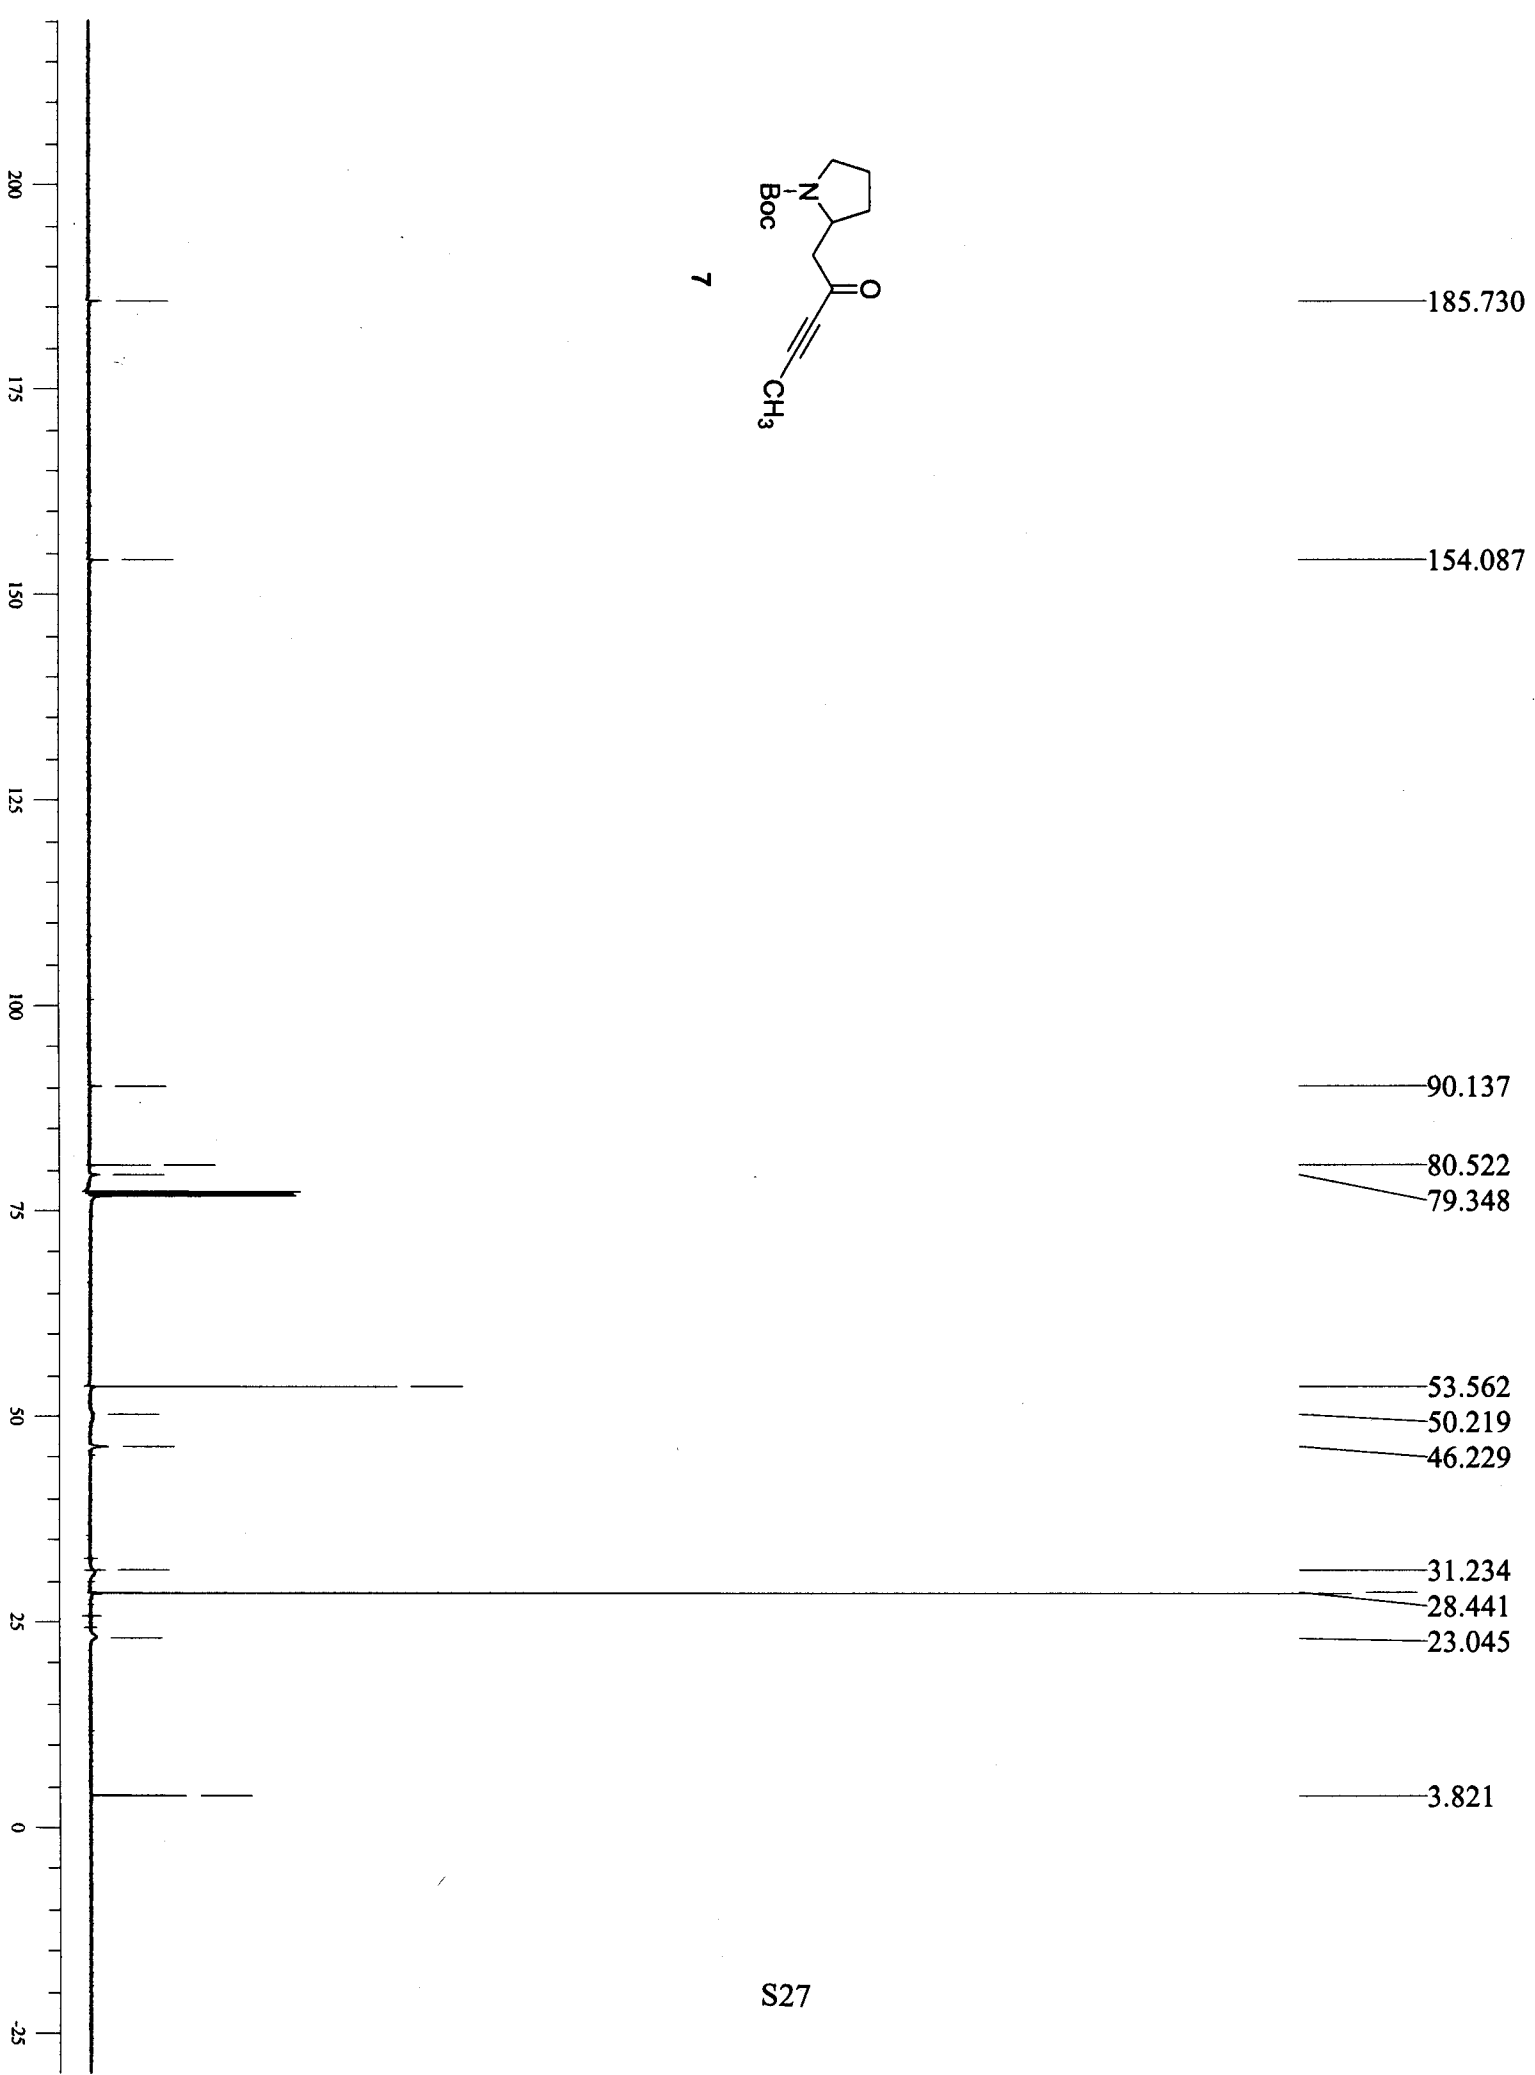

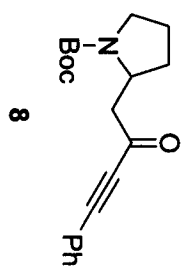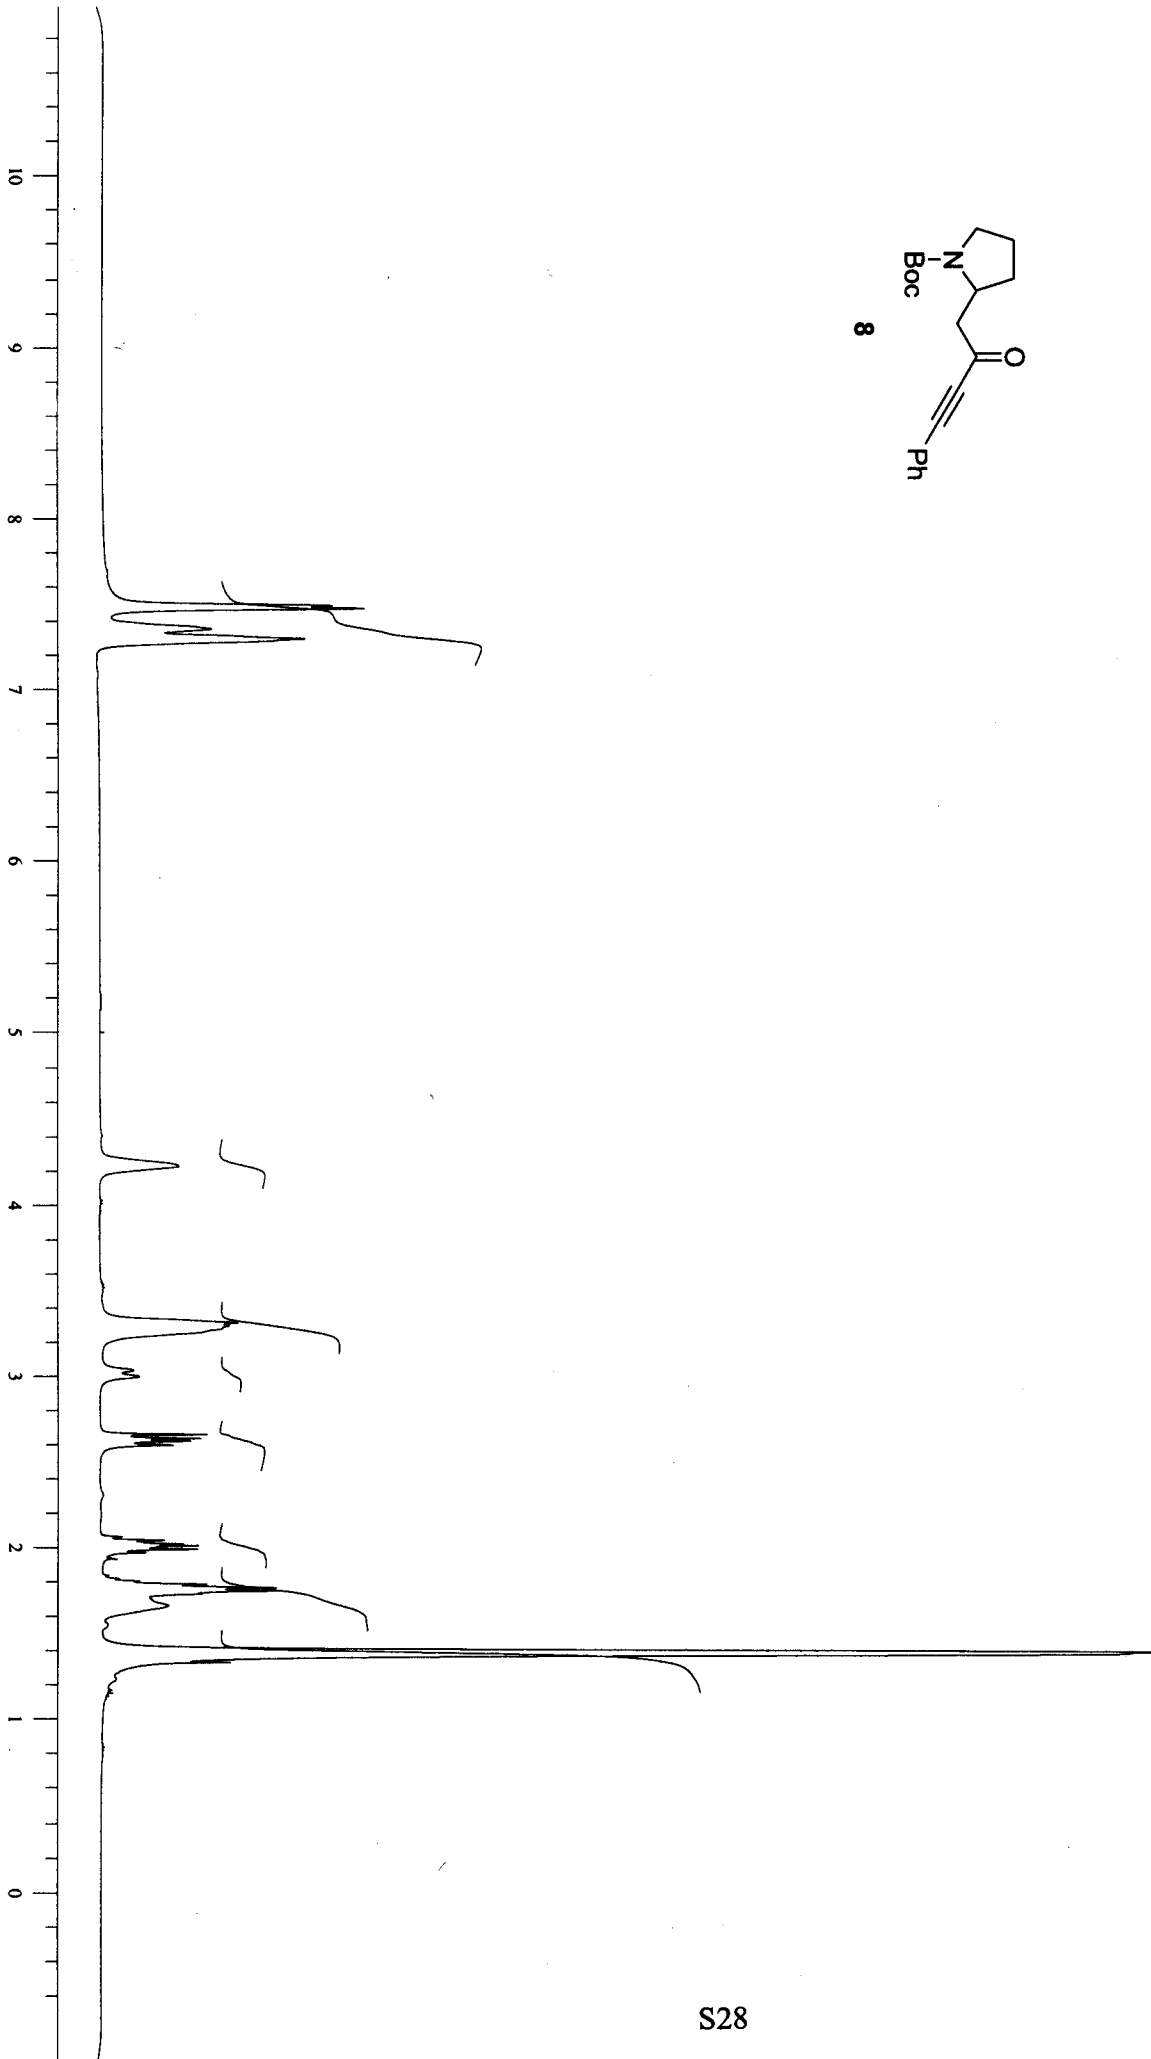

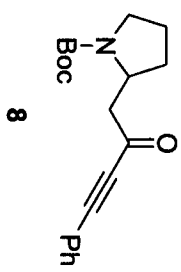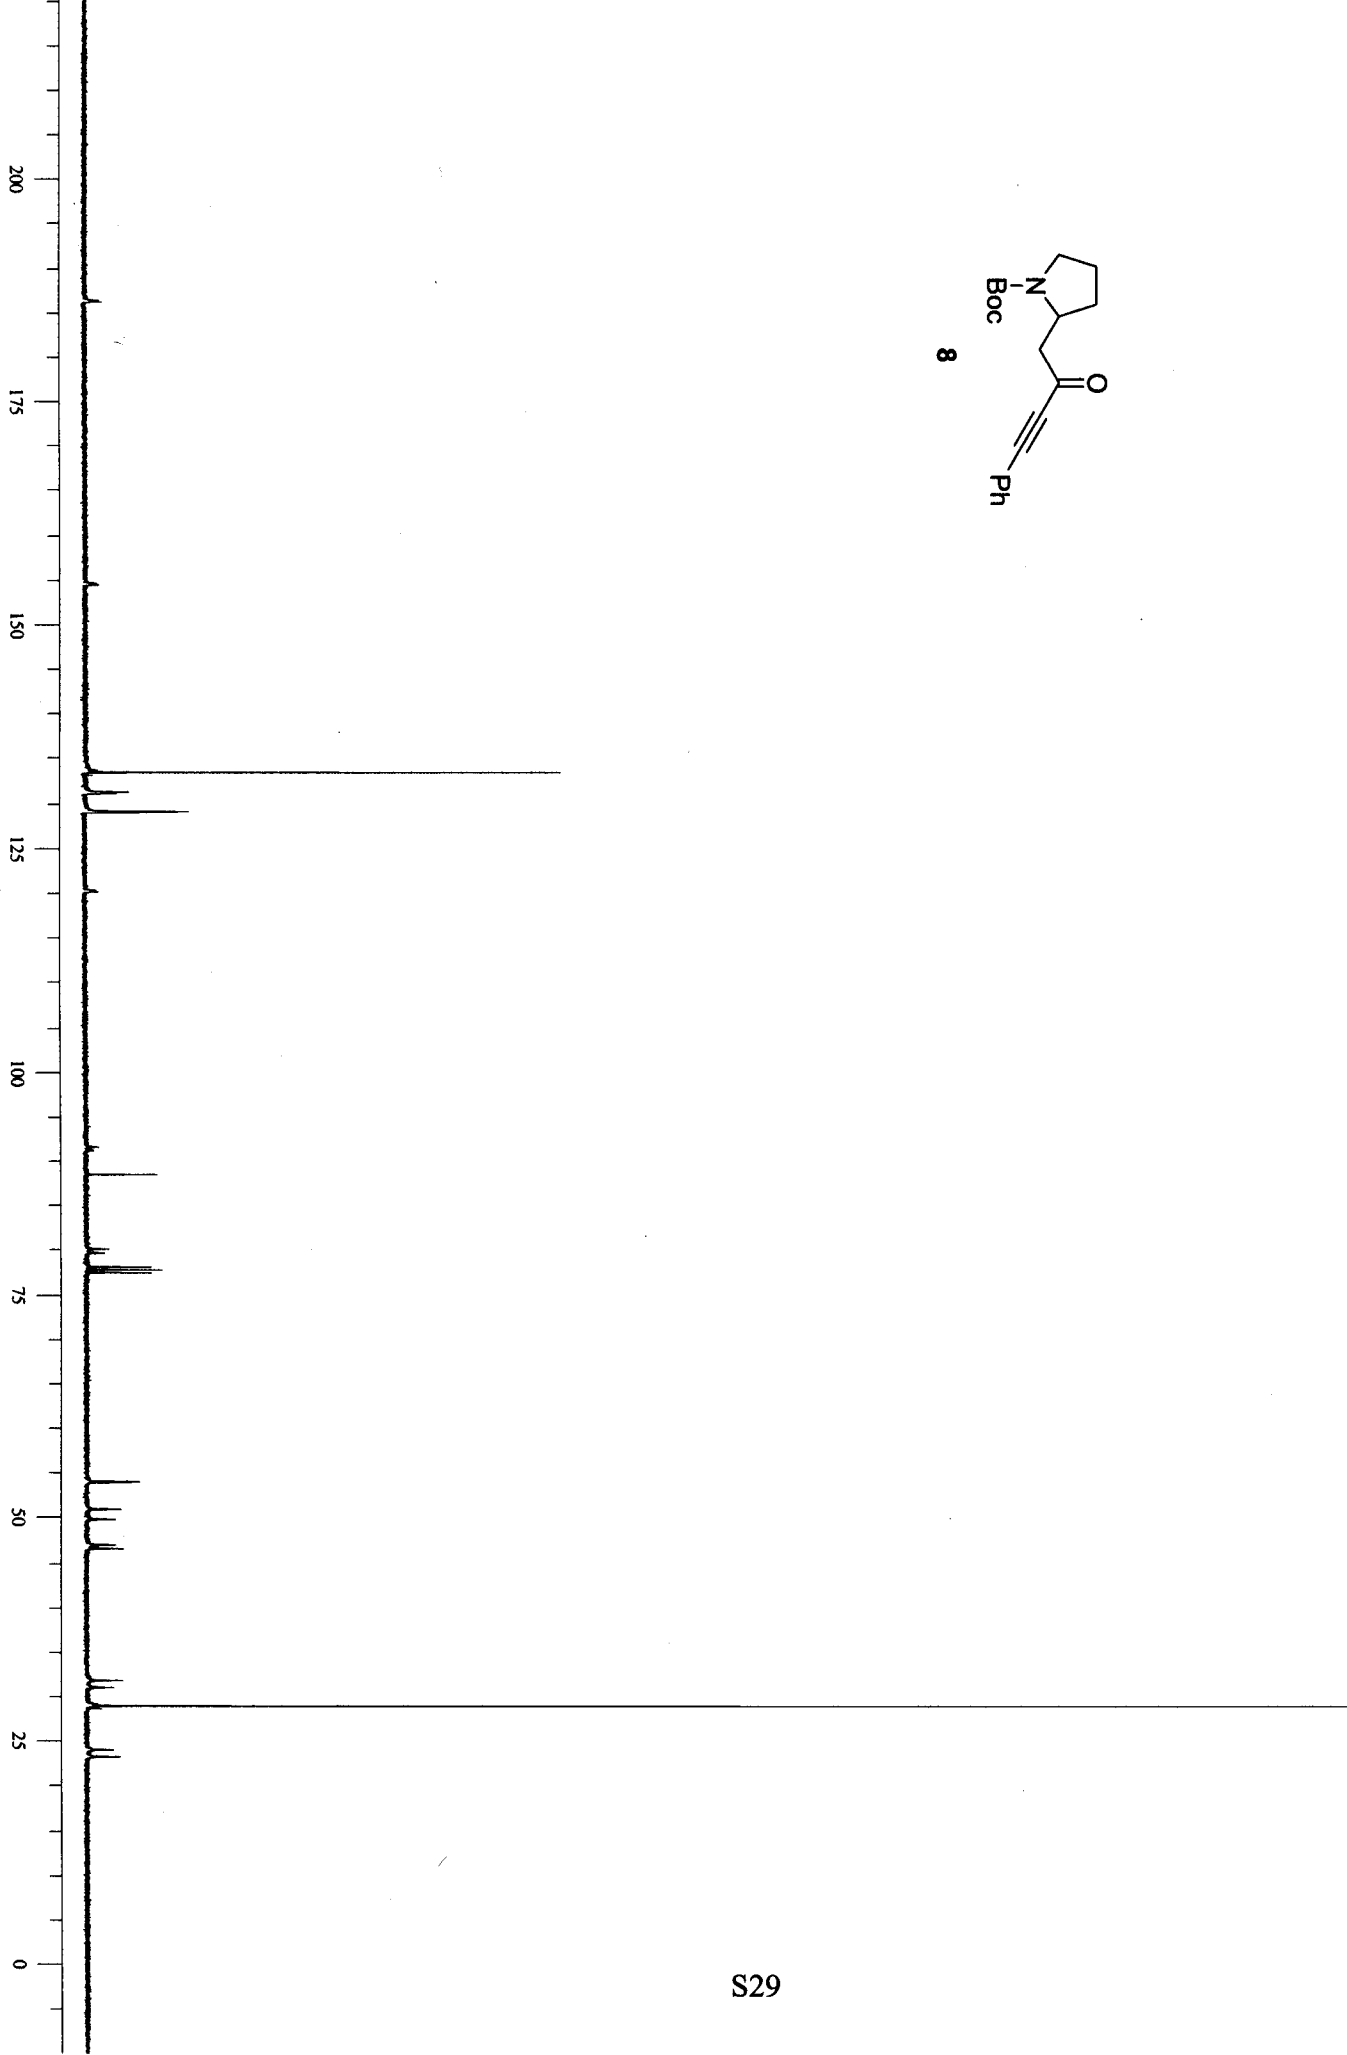

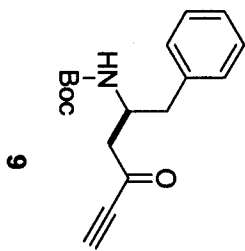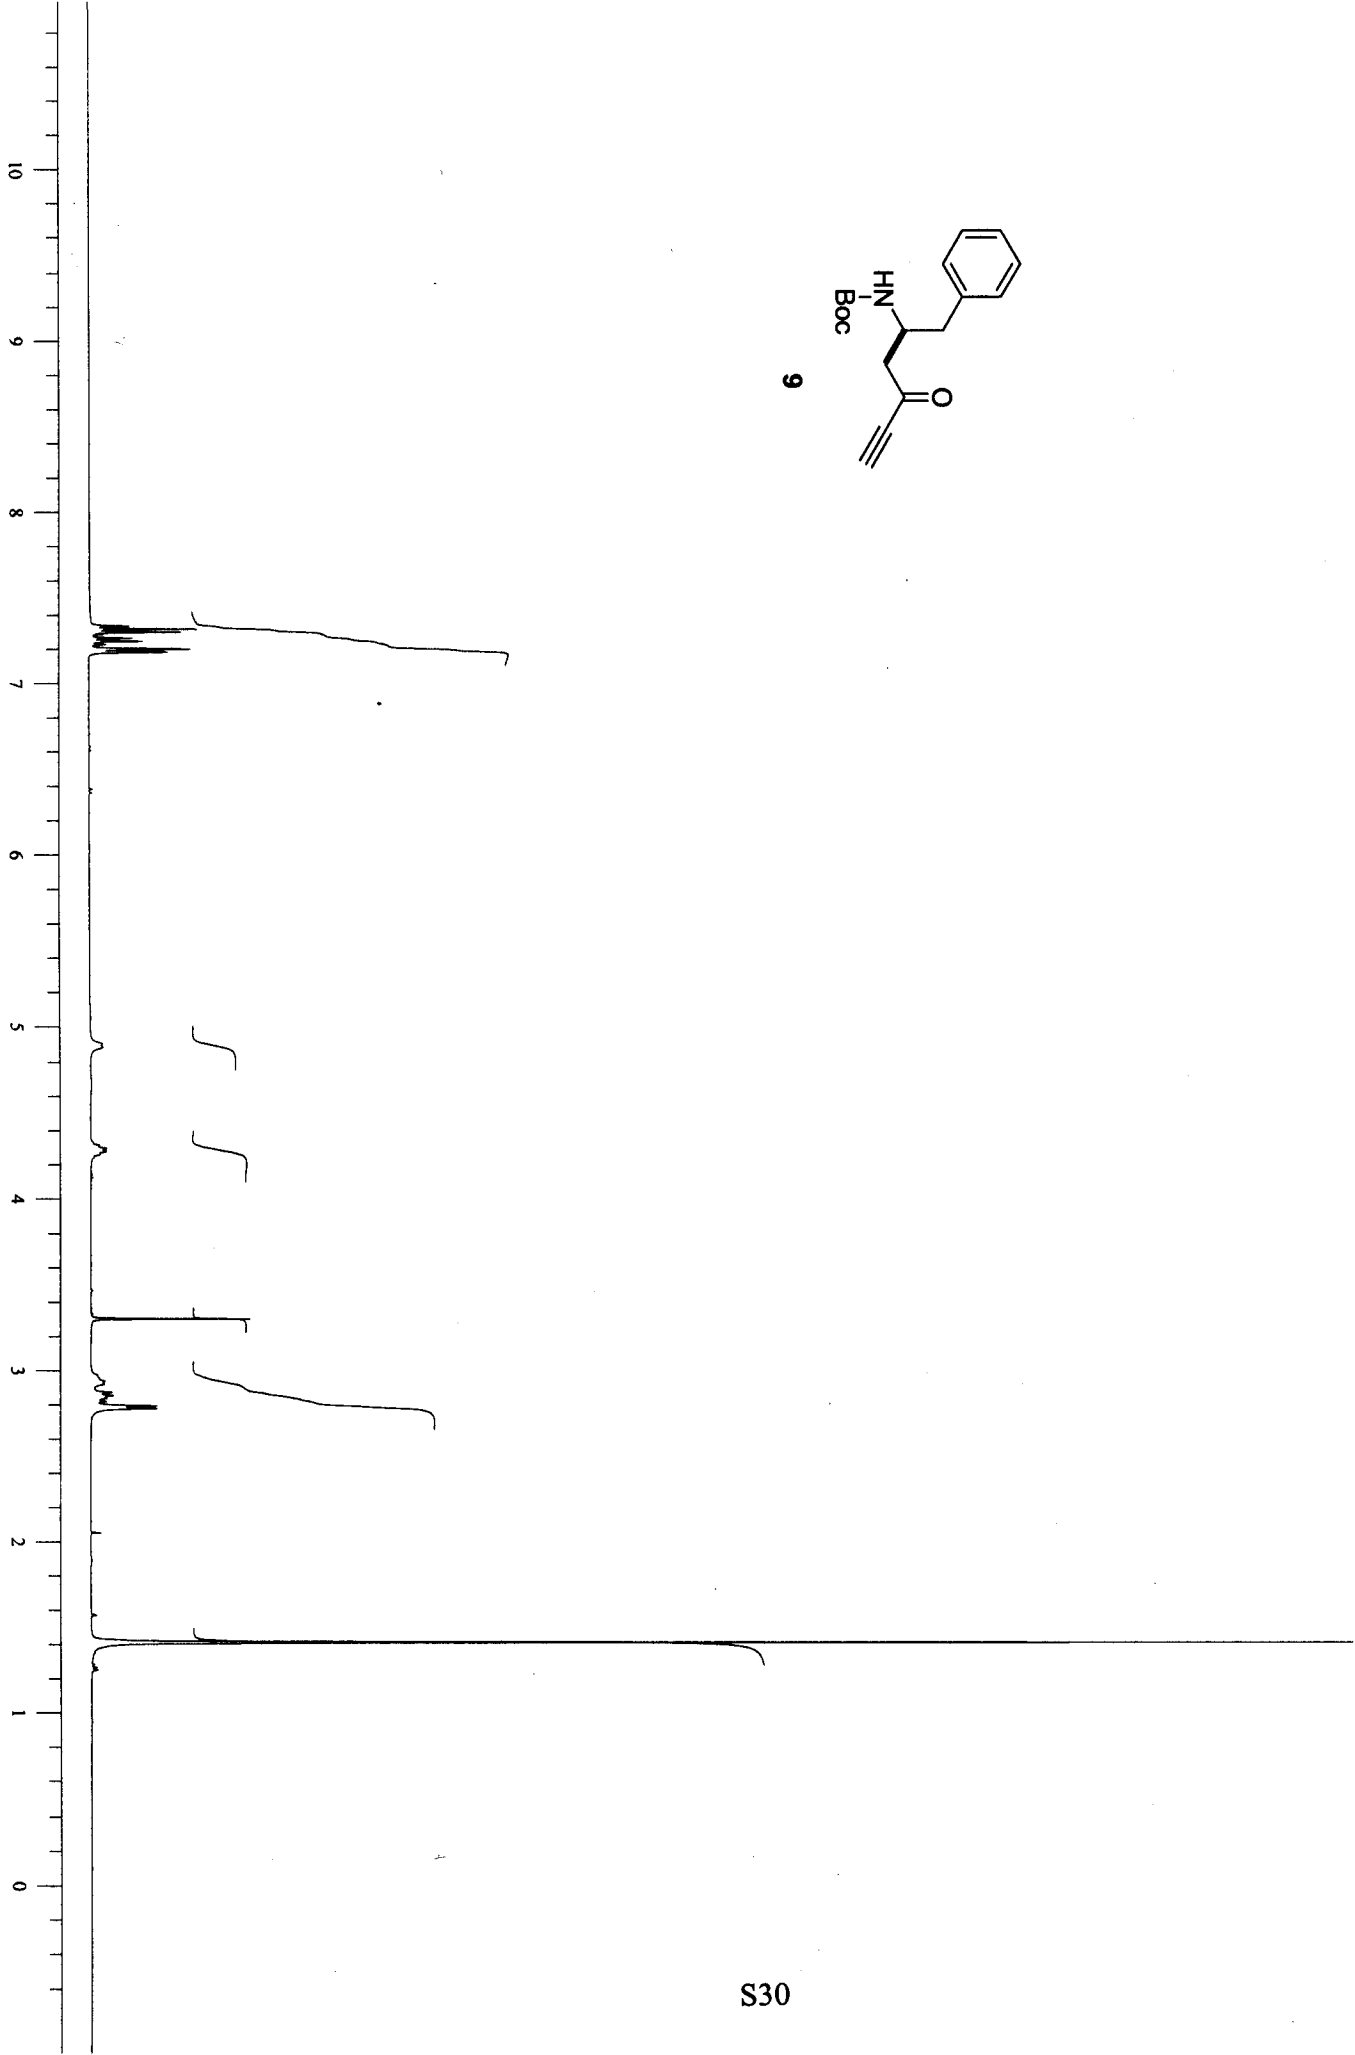

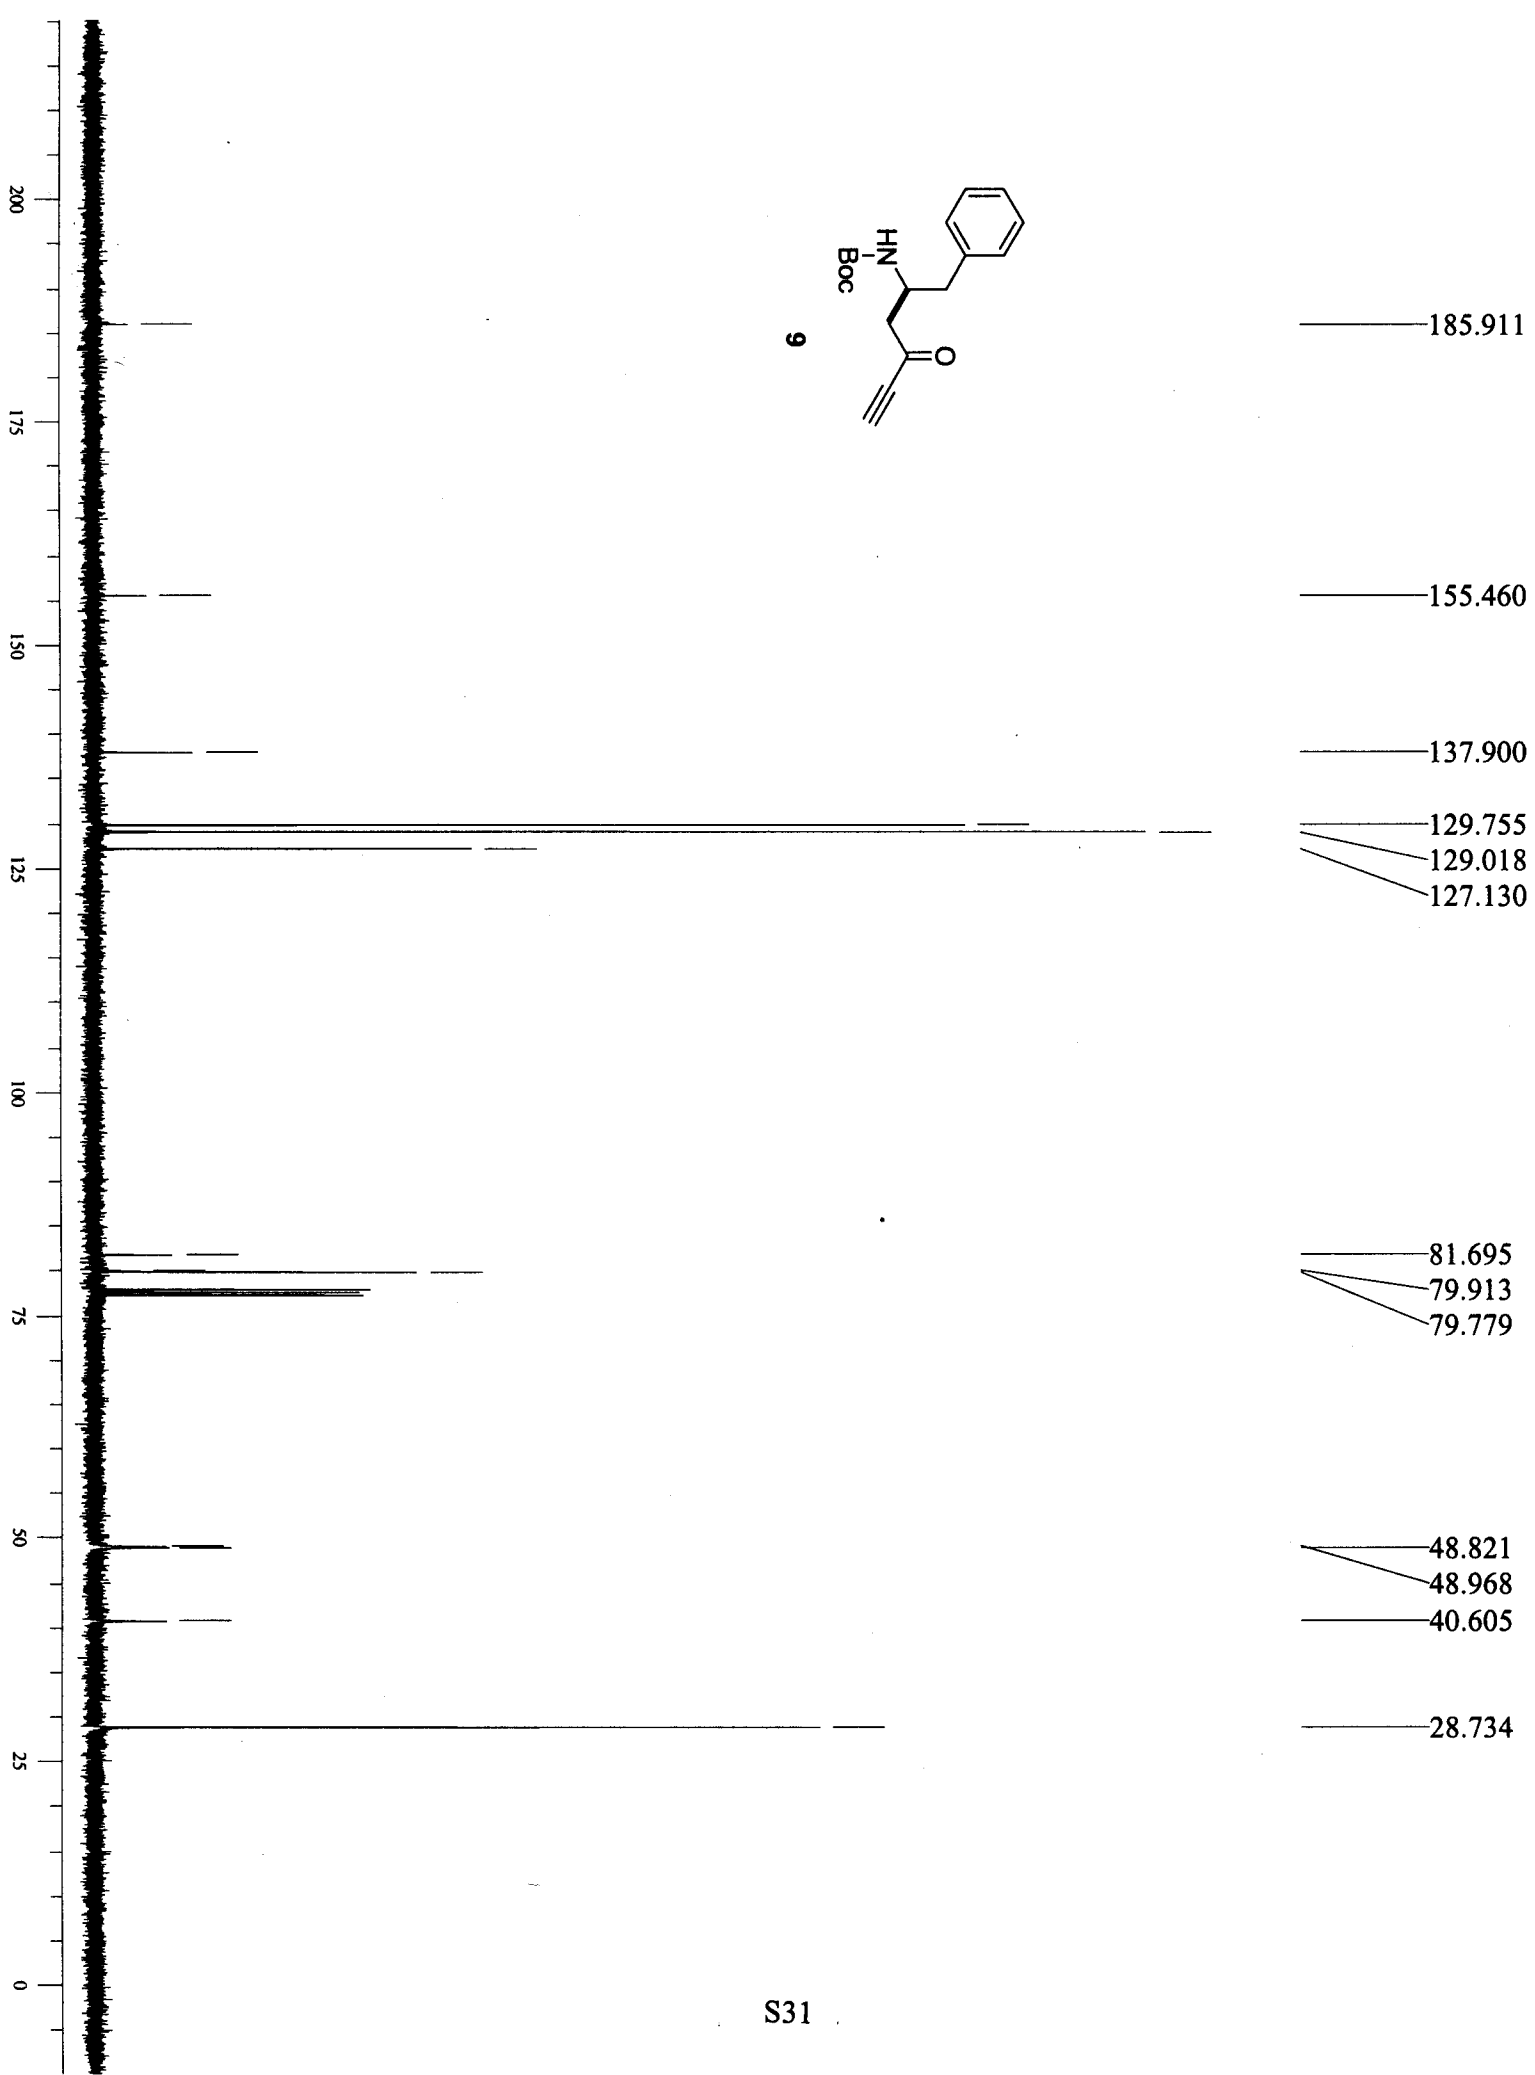

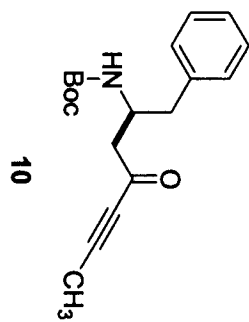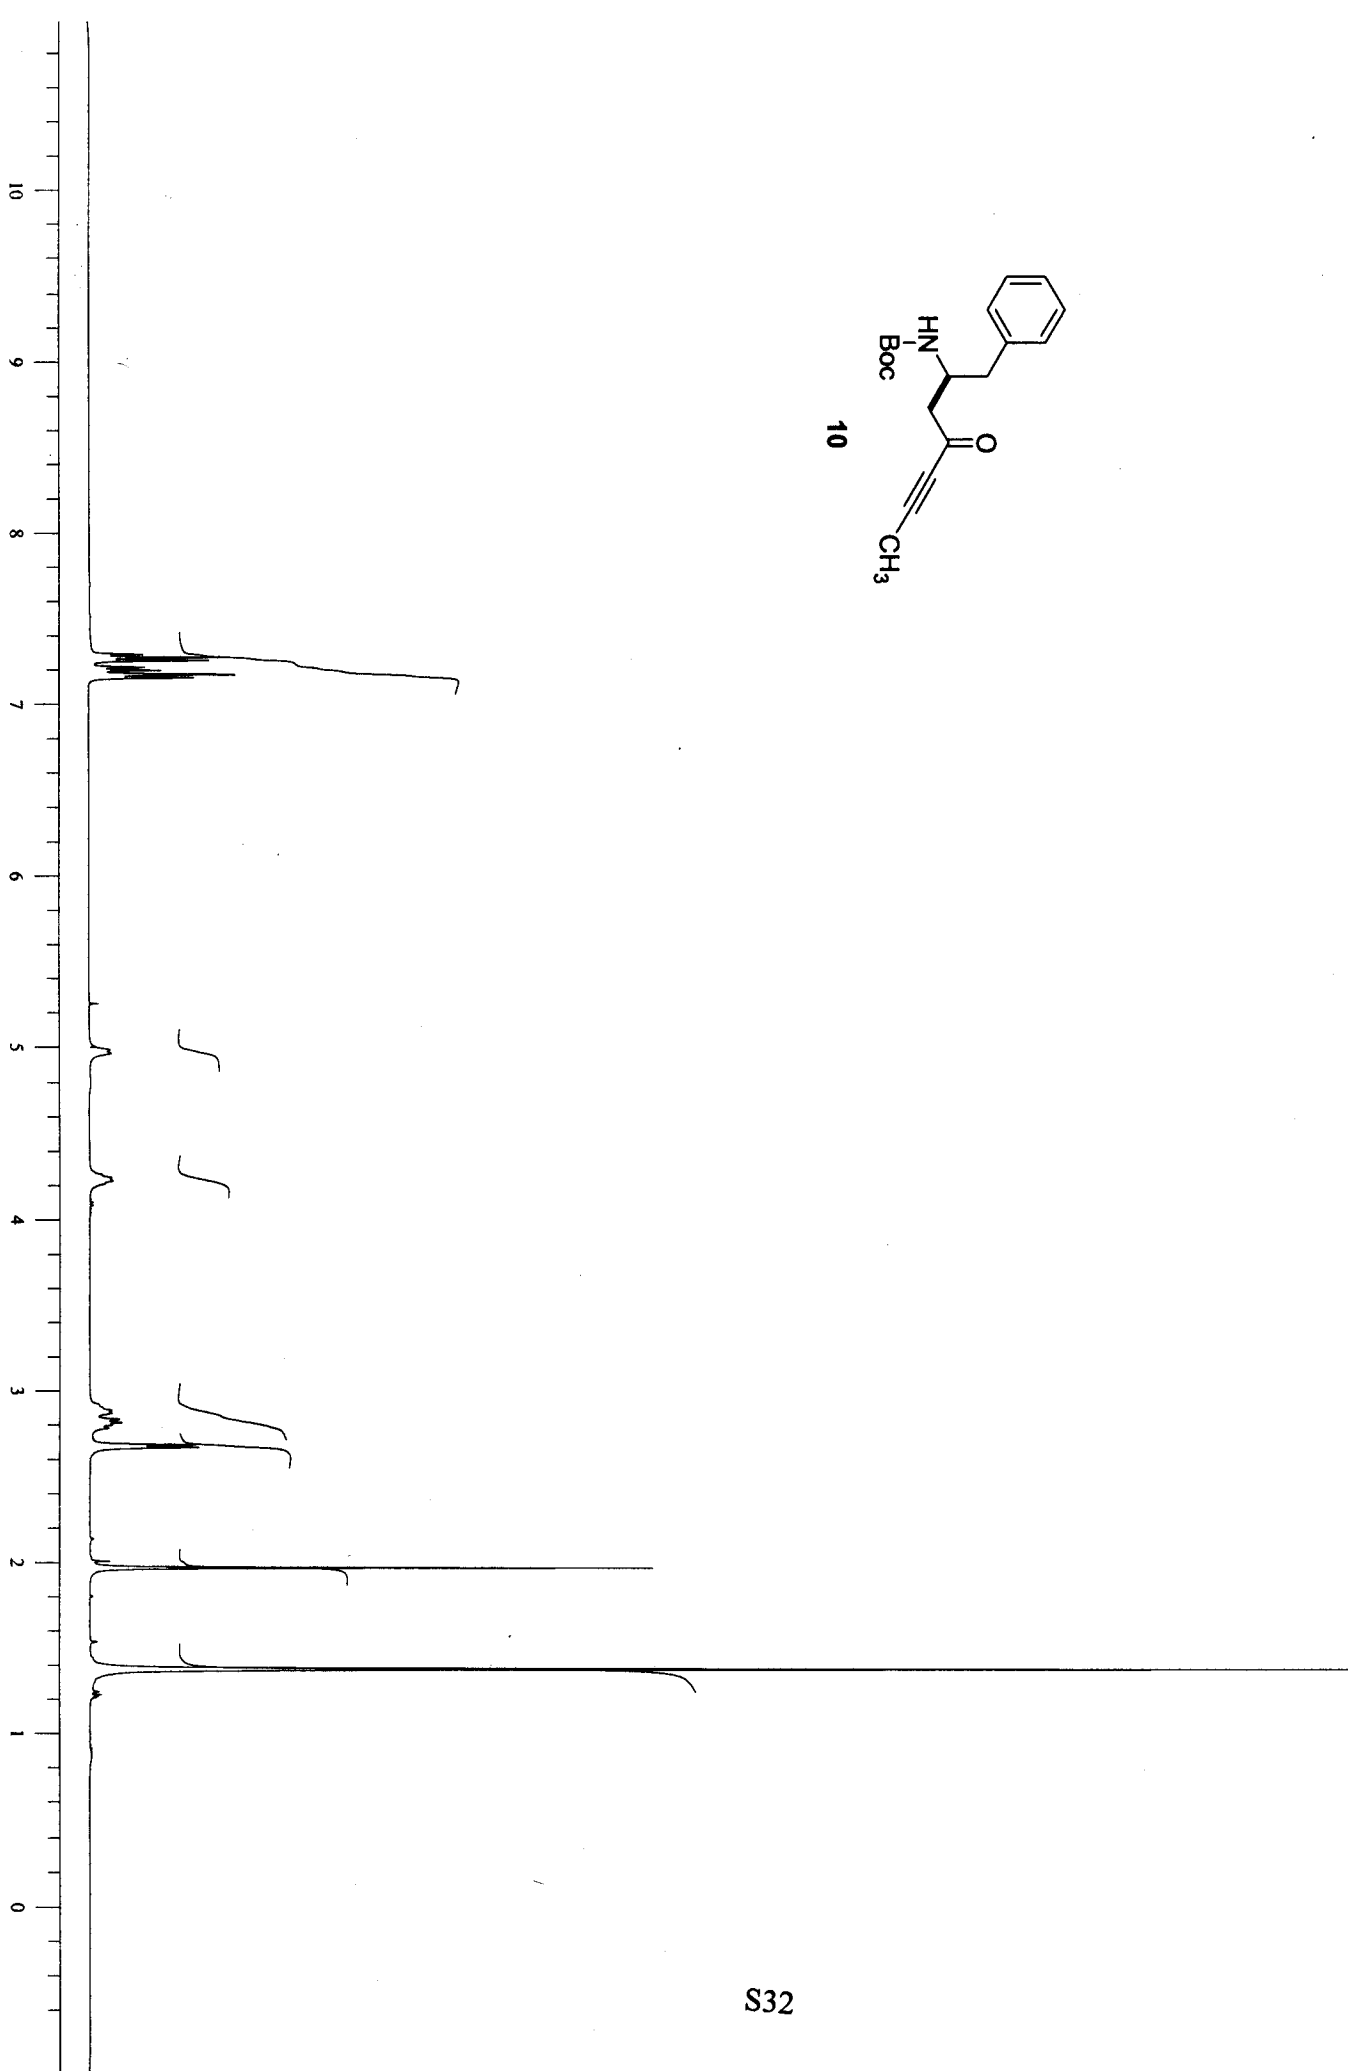



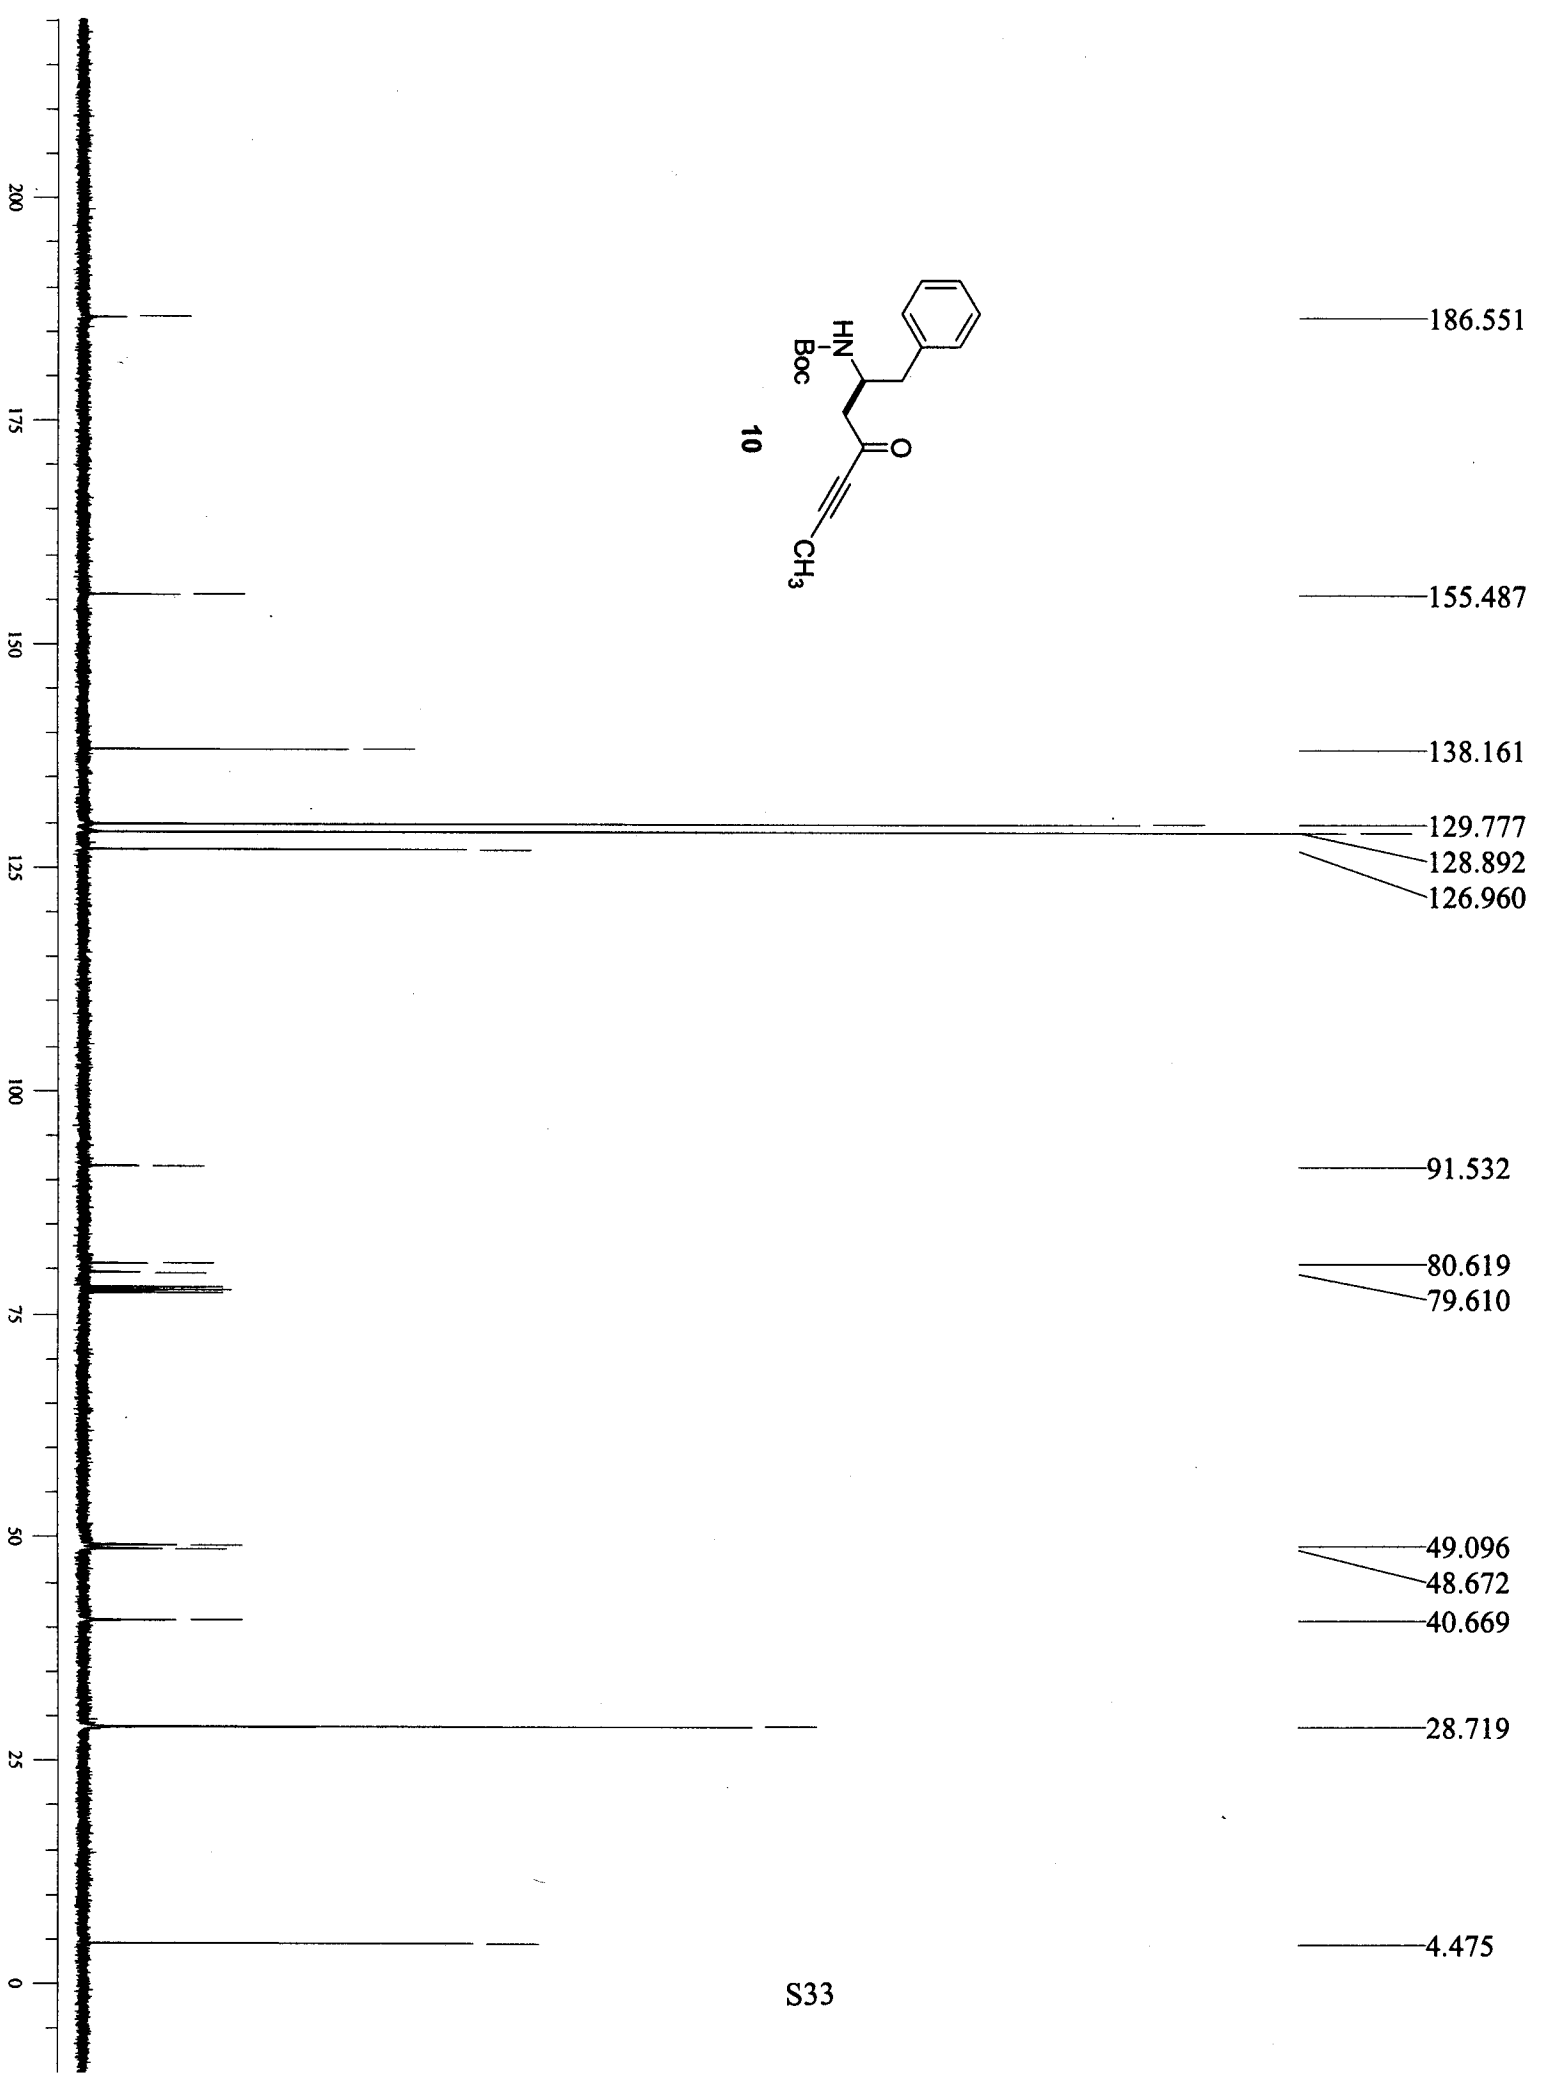

10

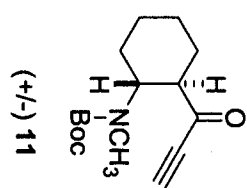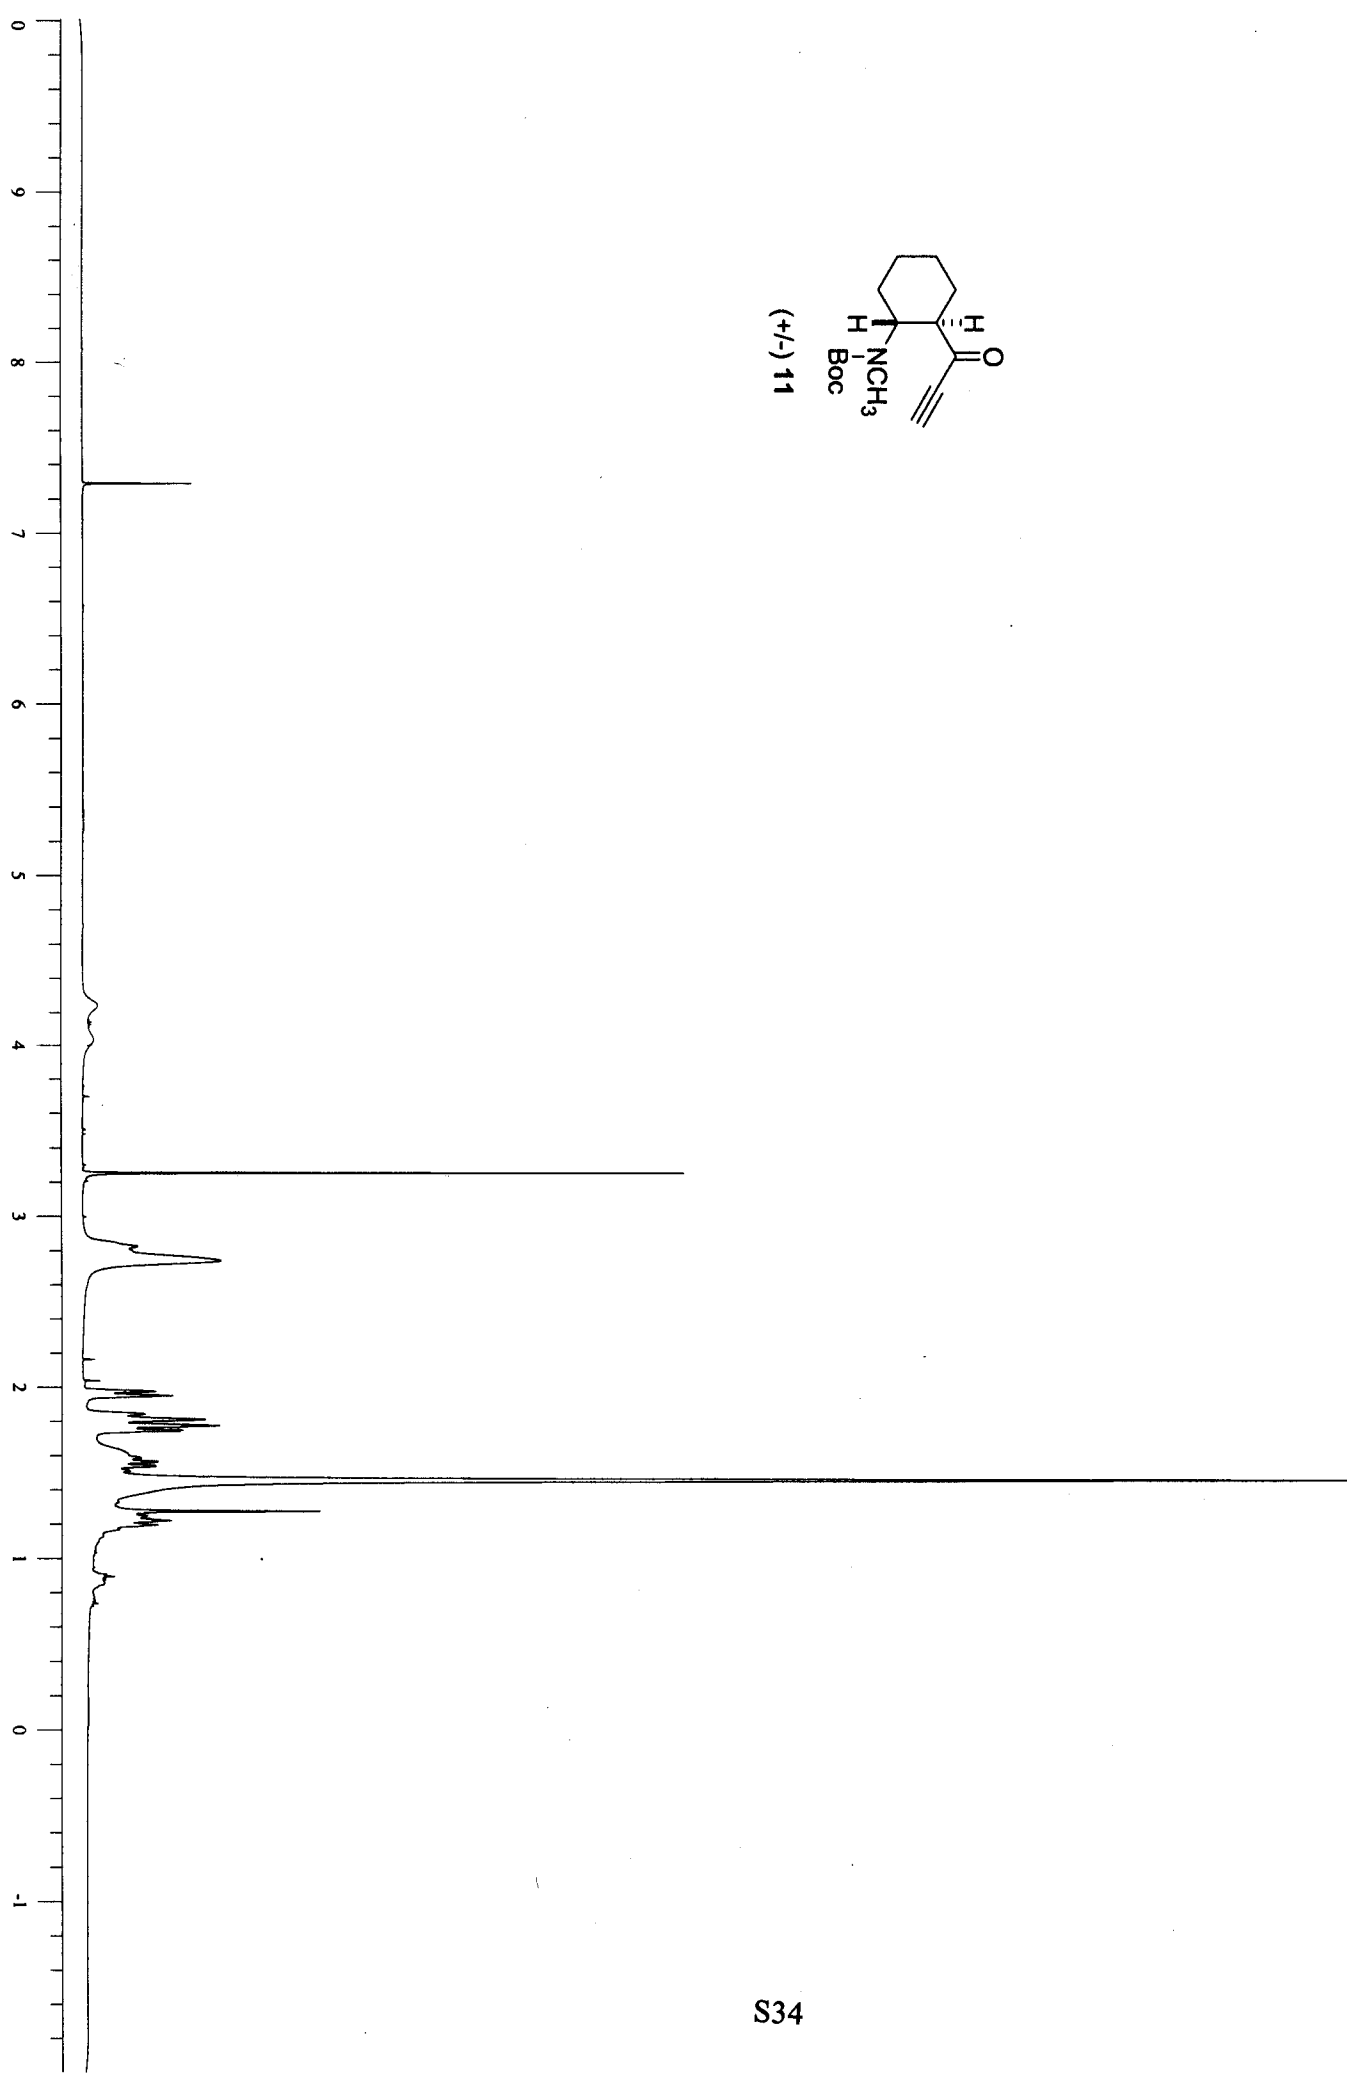

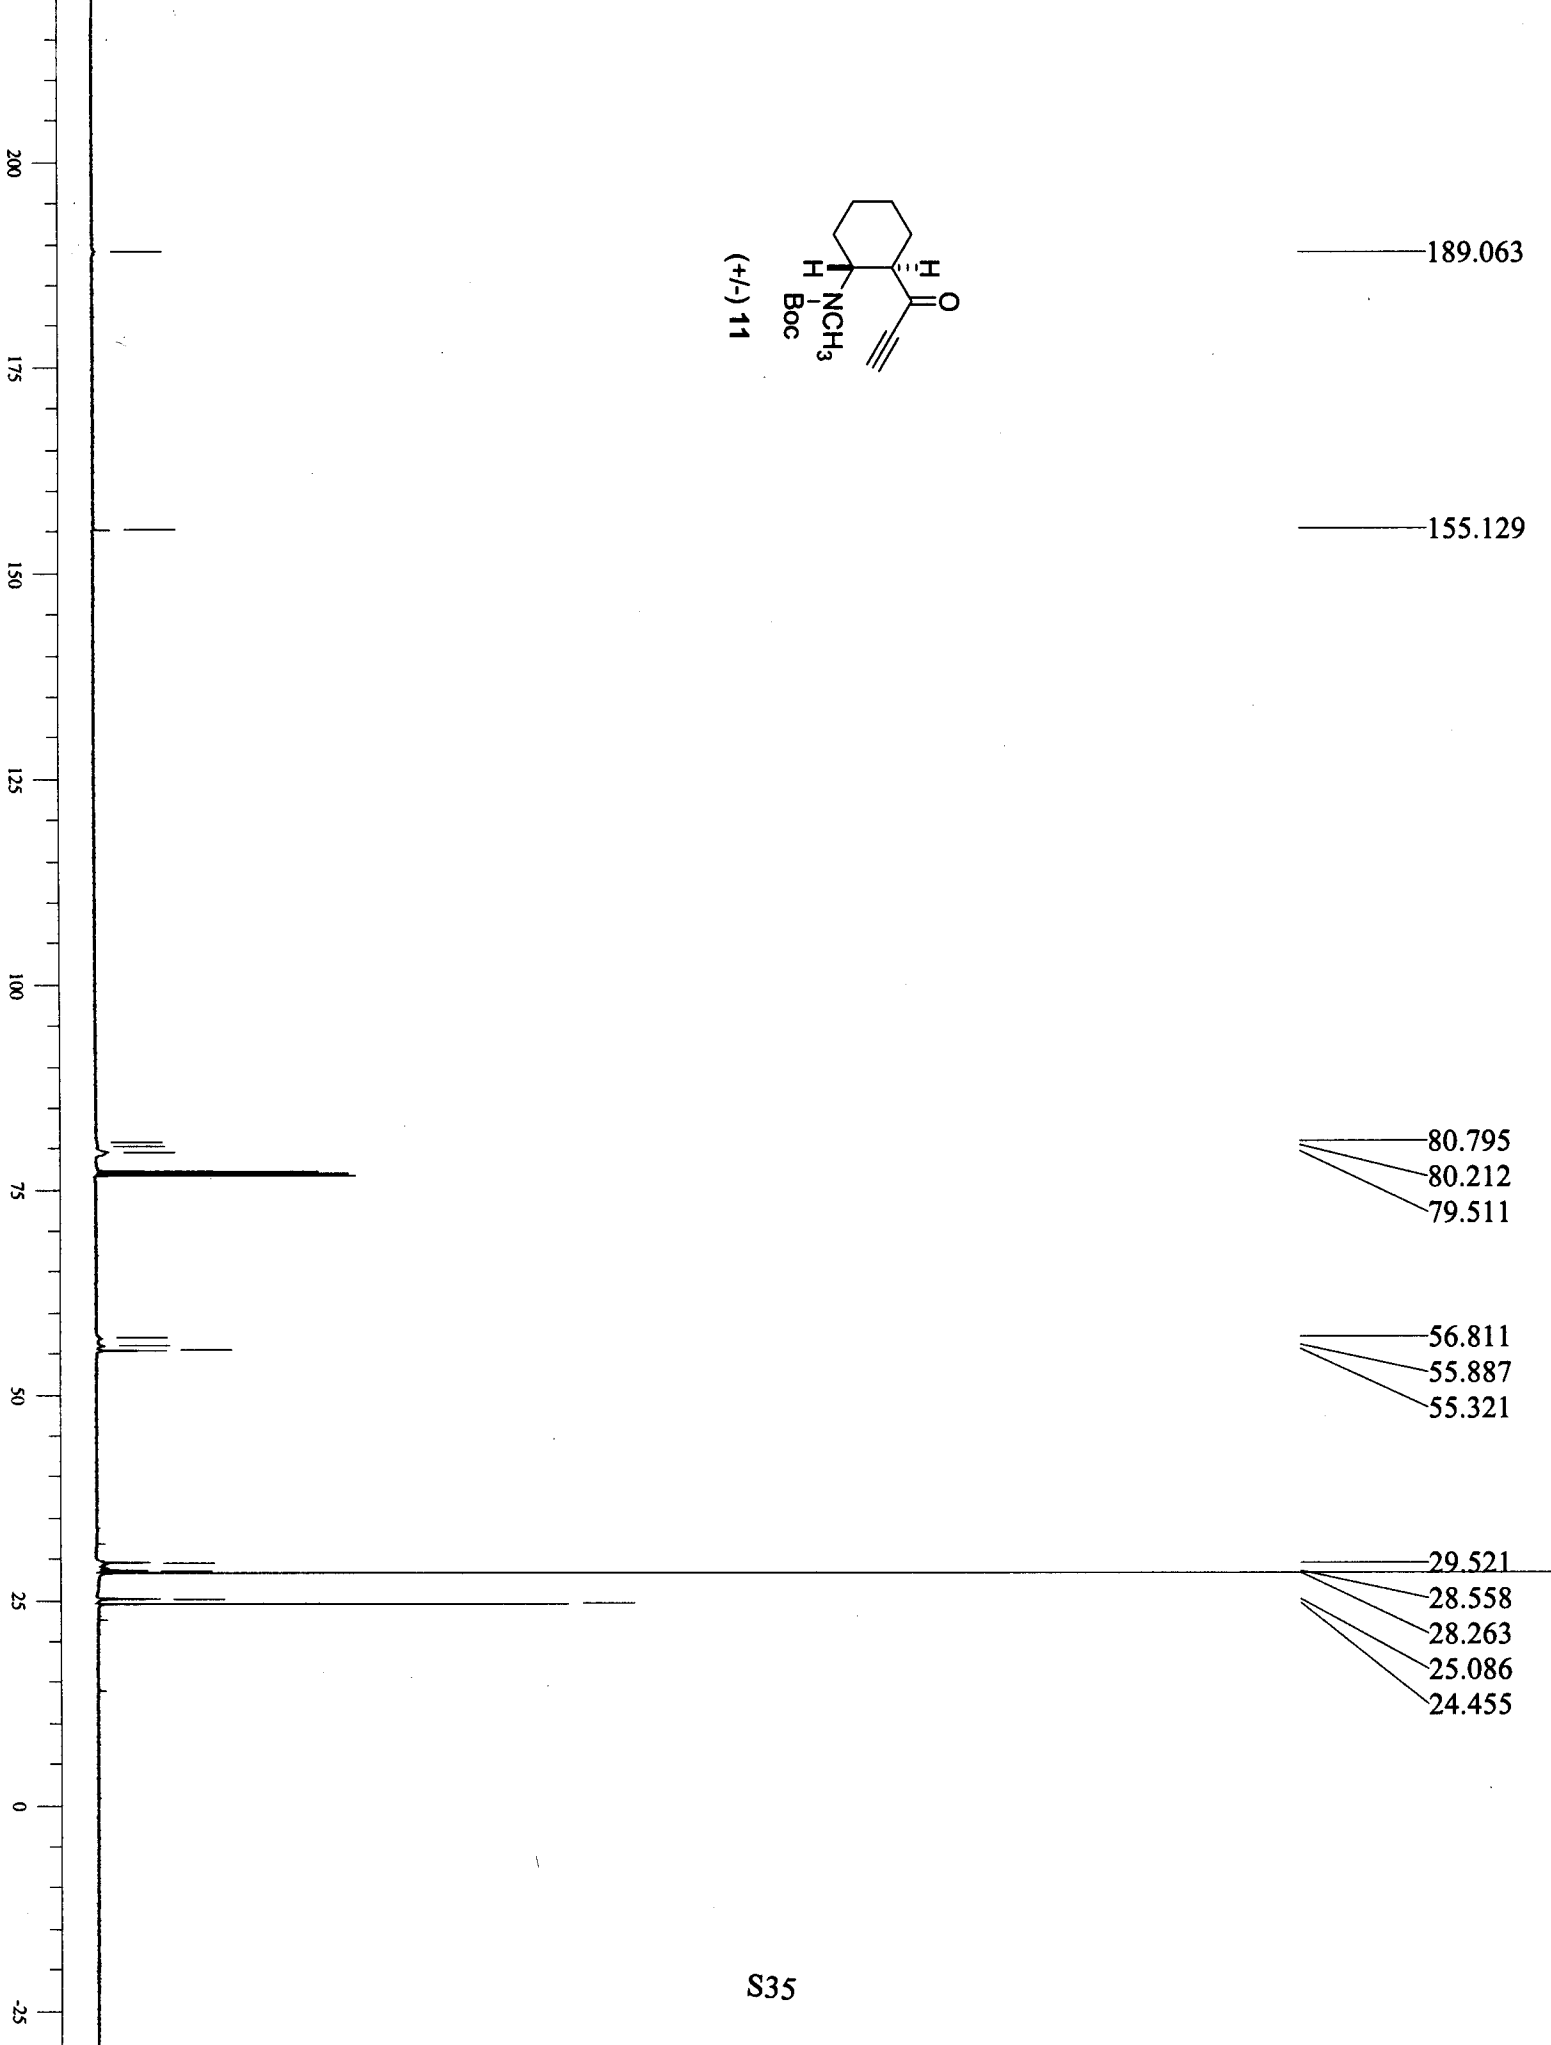

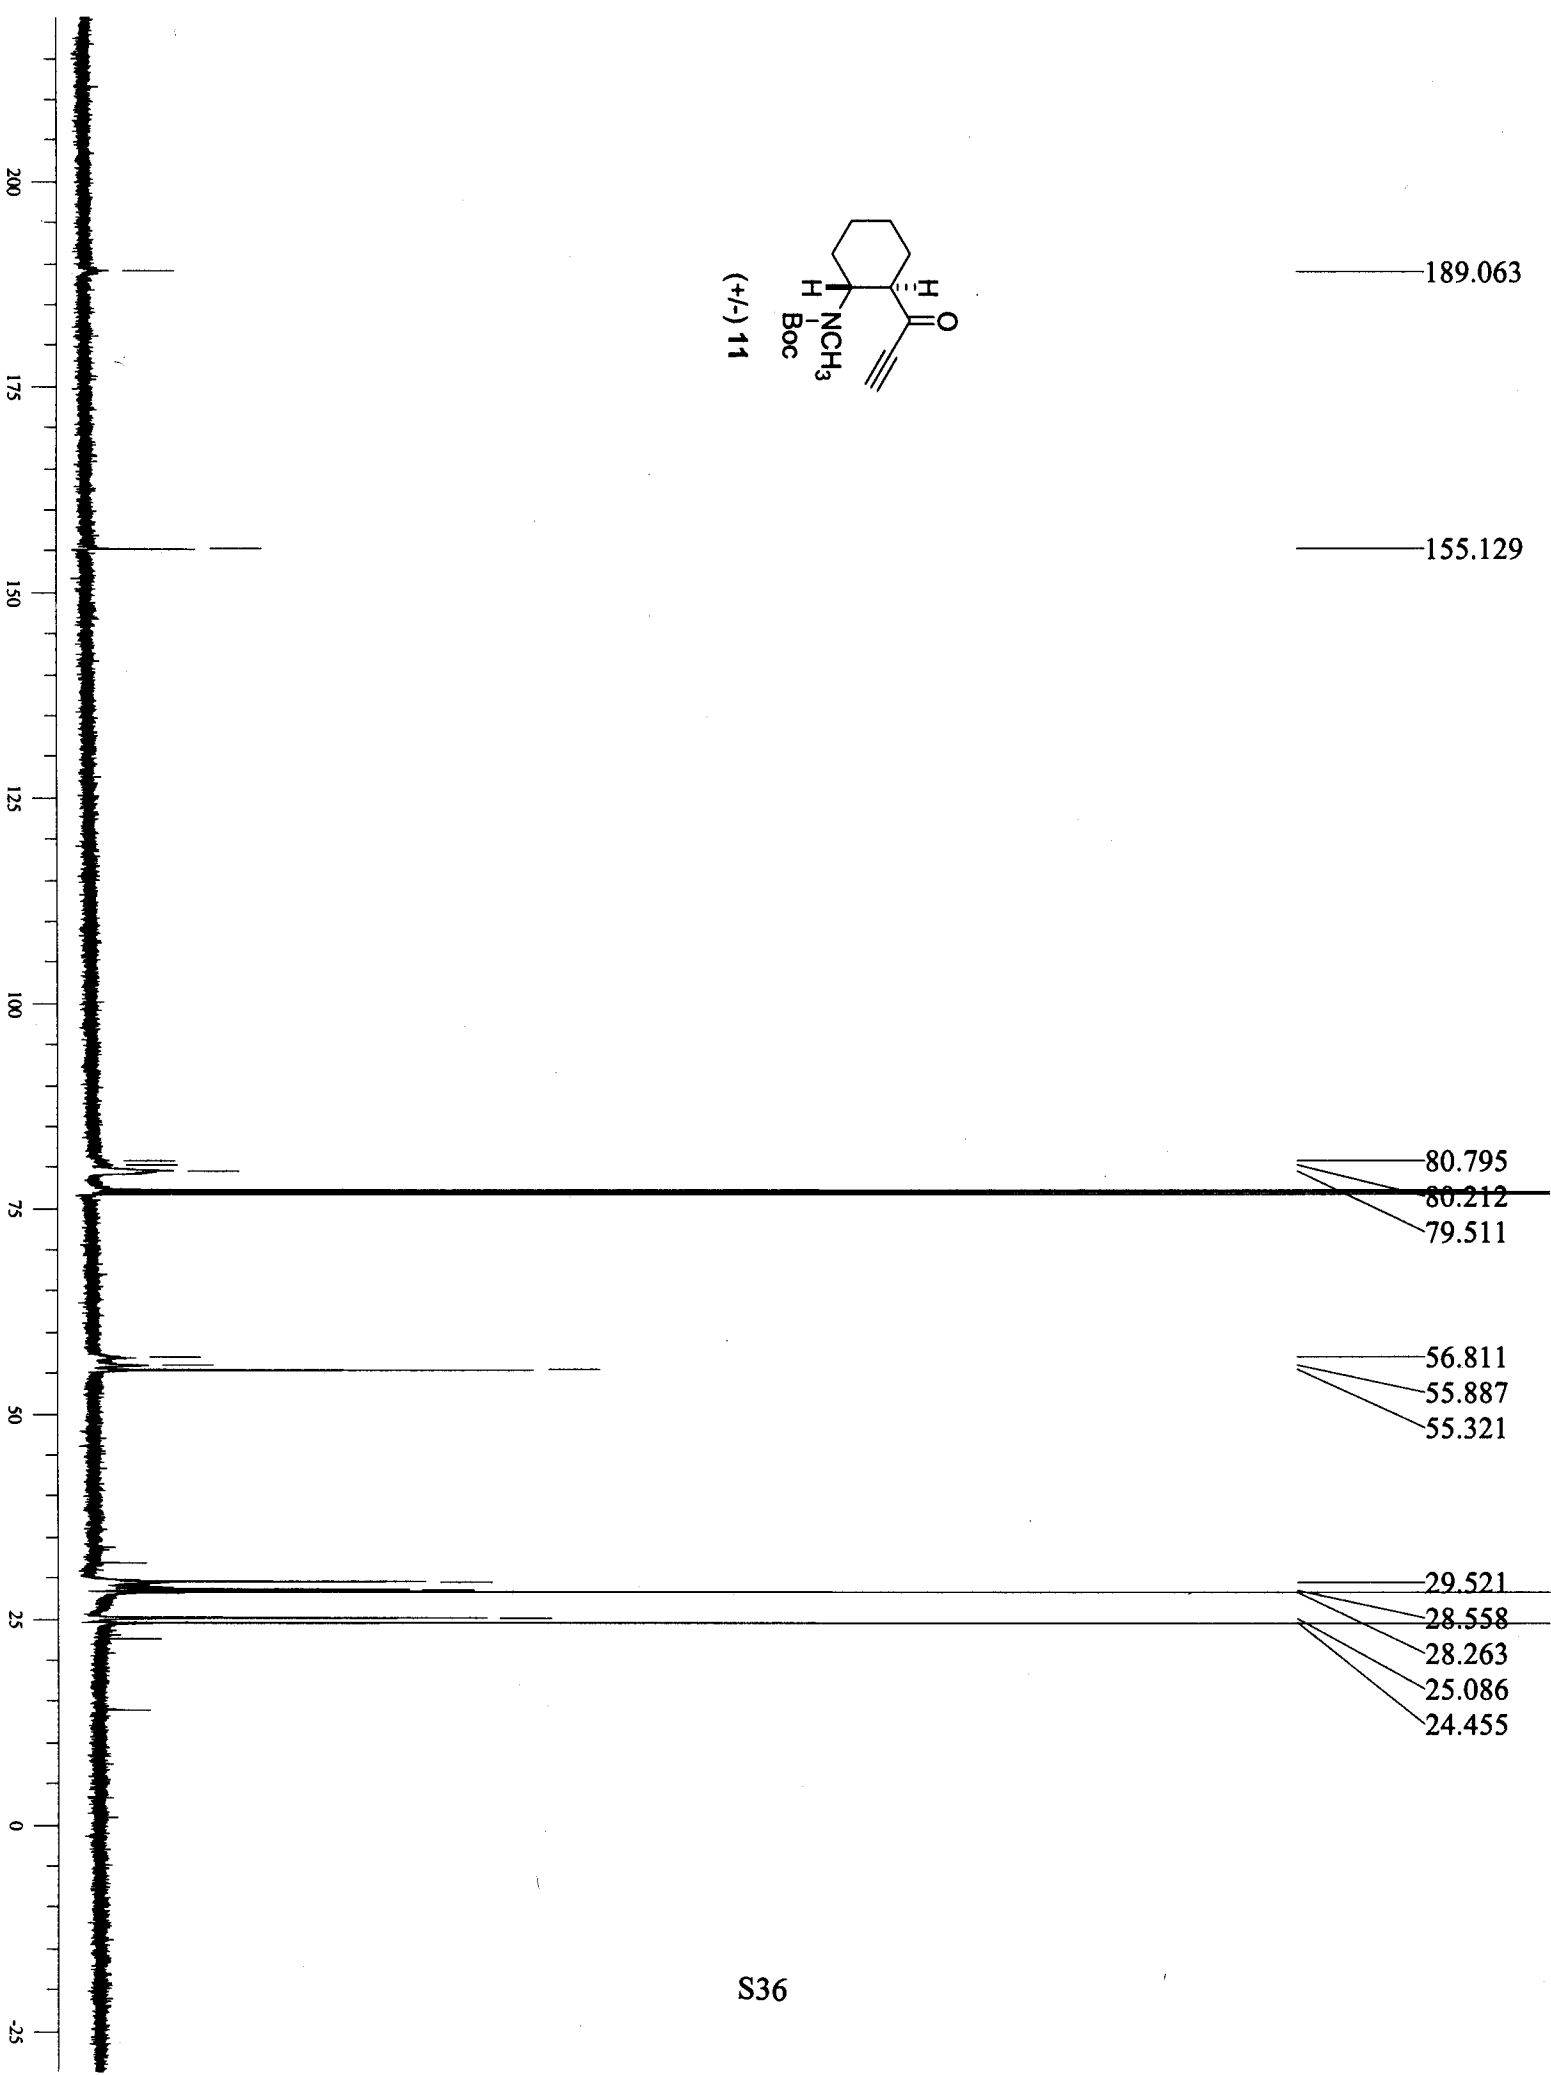

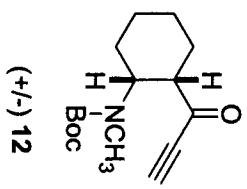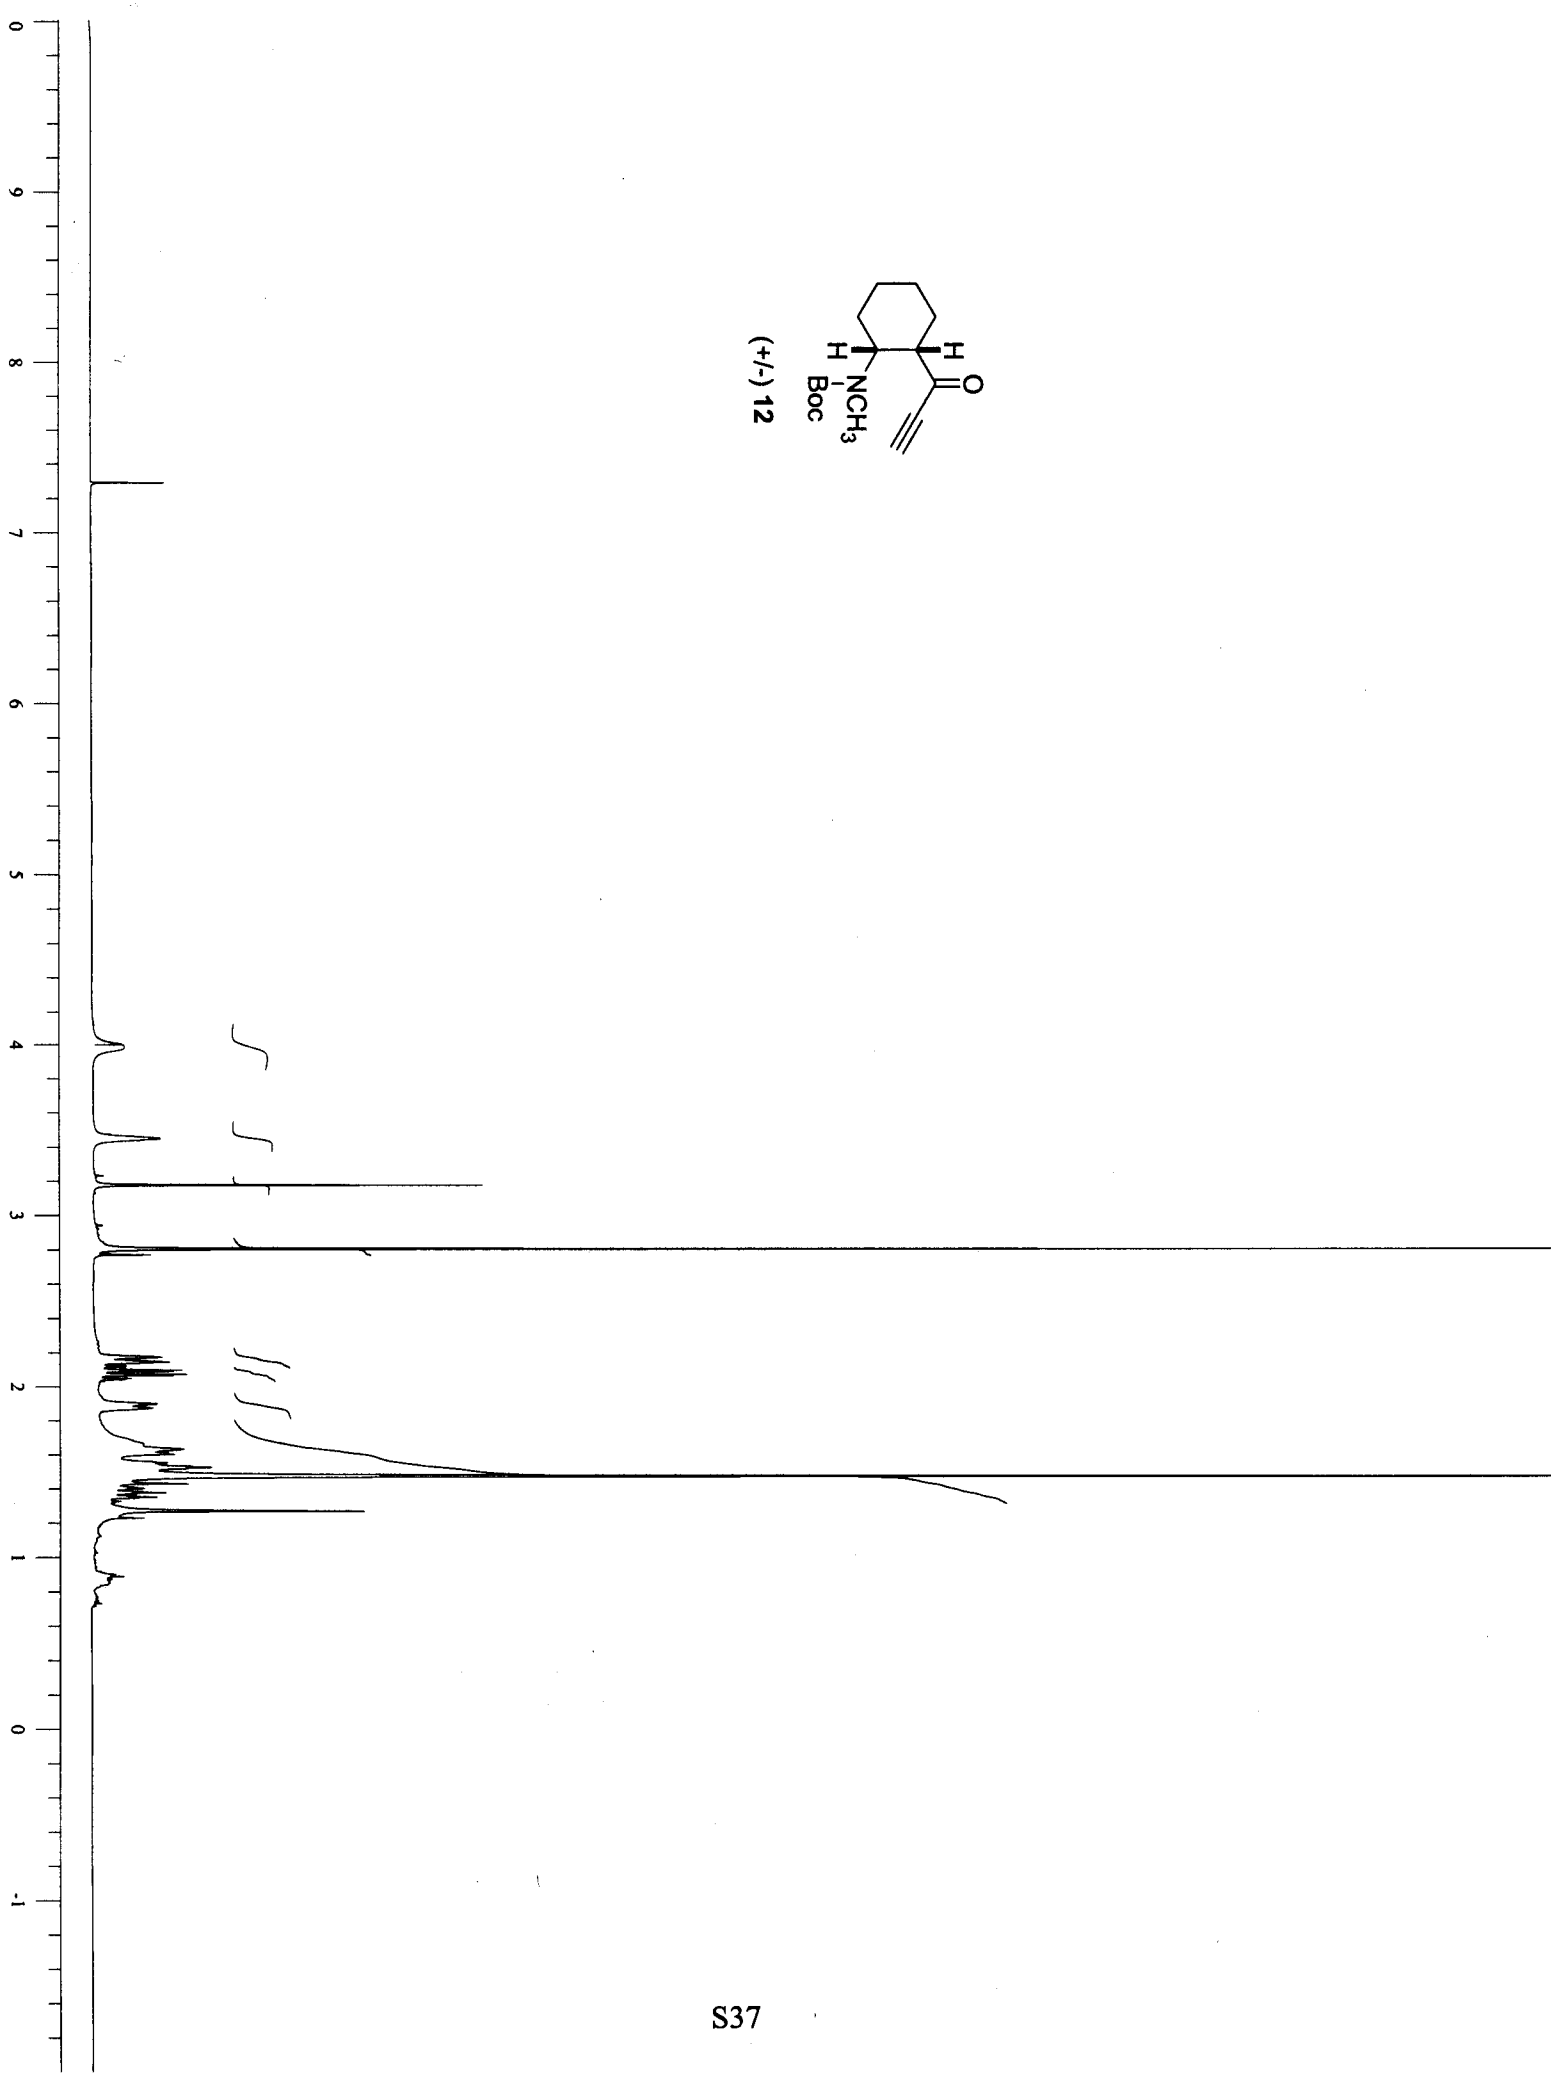

(+/-) 12

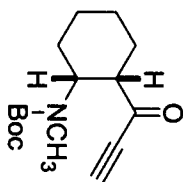

200  
175  
150  
125  
100  
75  
50  
25  
0  
-25

189.630

155.624

82.215

79.322

77.314

56.145

52.163

29.514

28.362

27.667

26.164

25.722

21.258

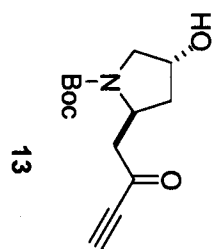

10  
9  
8  
7  
6  
5  
4  
3  
2  
1  
0

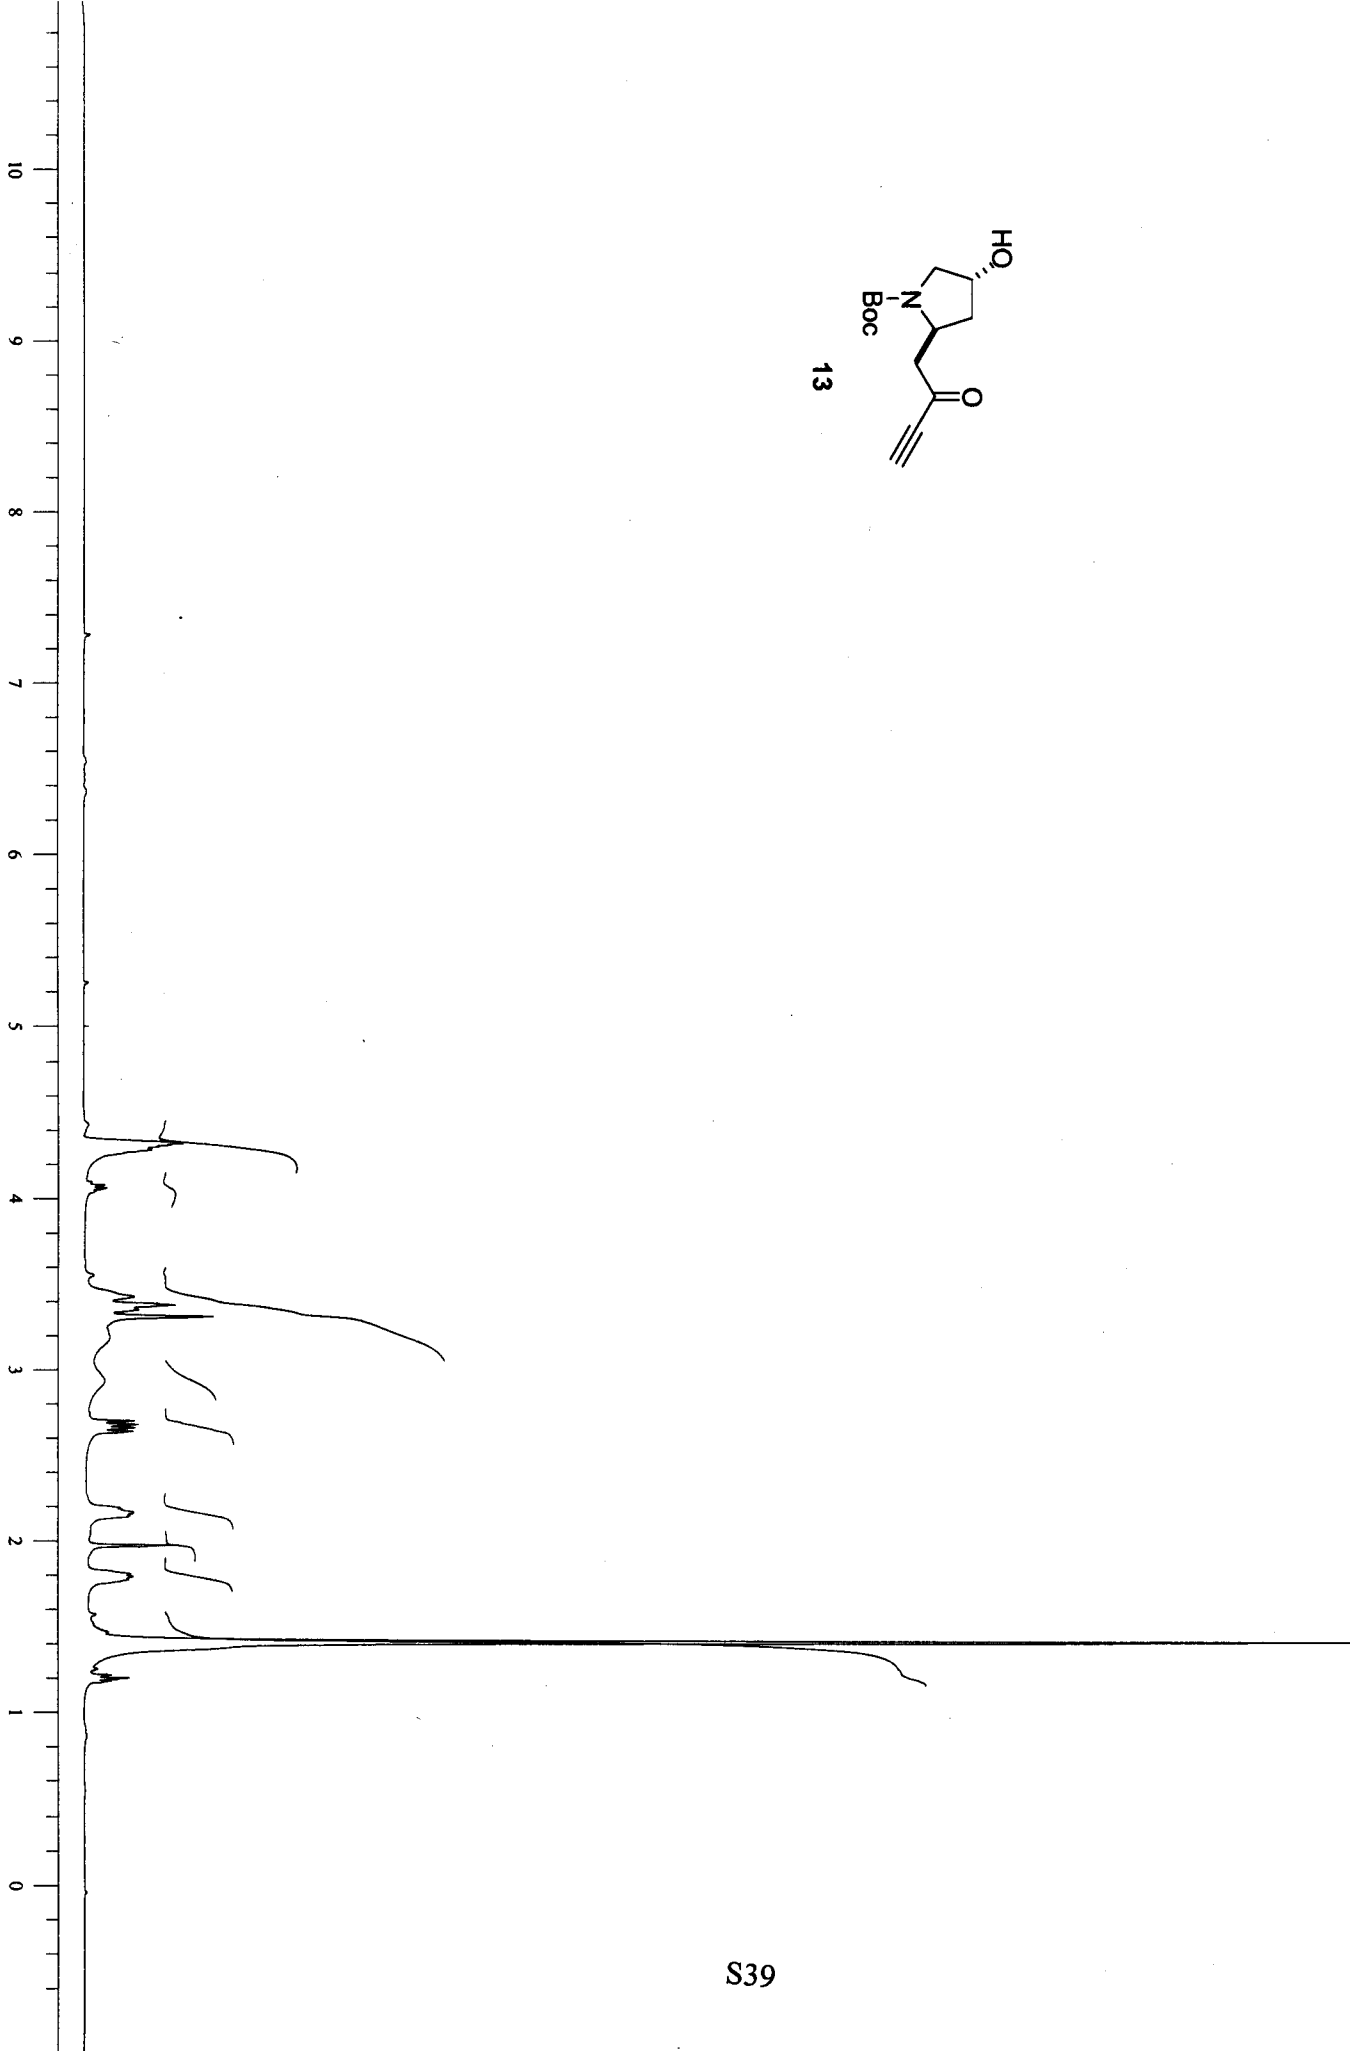

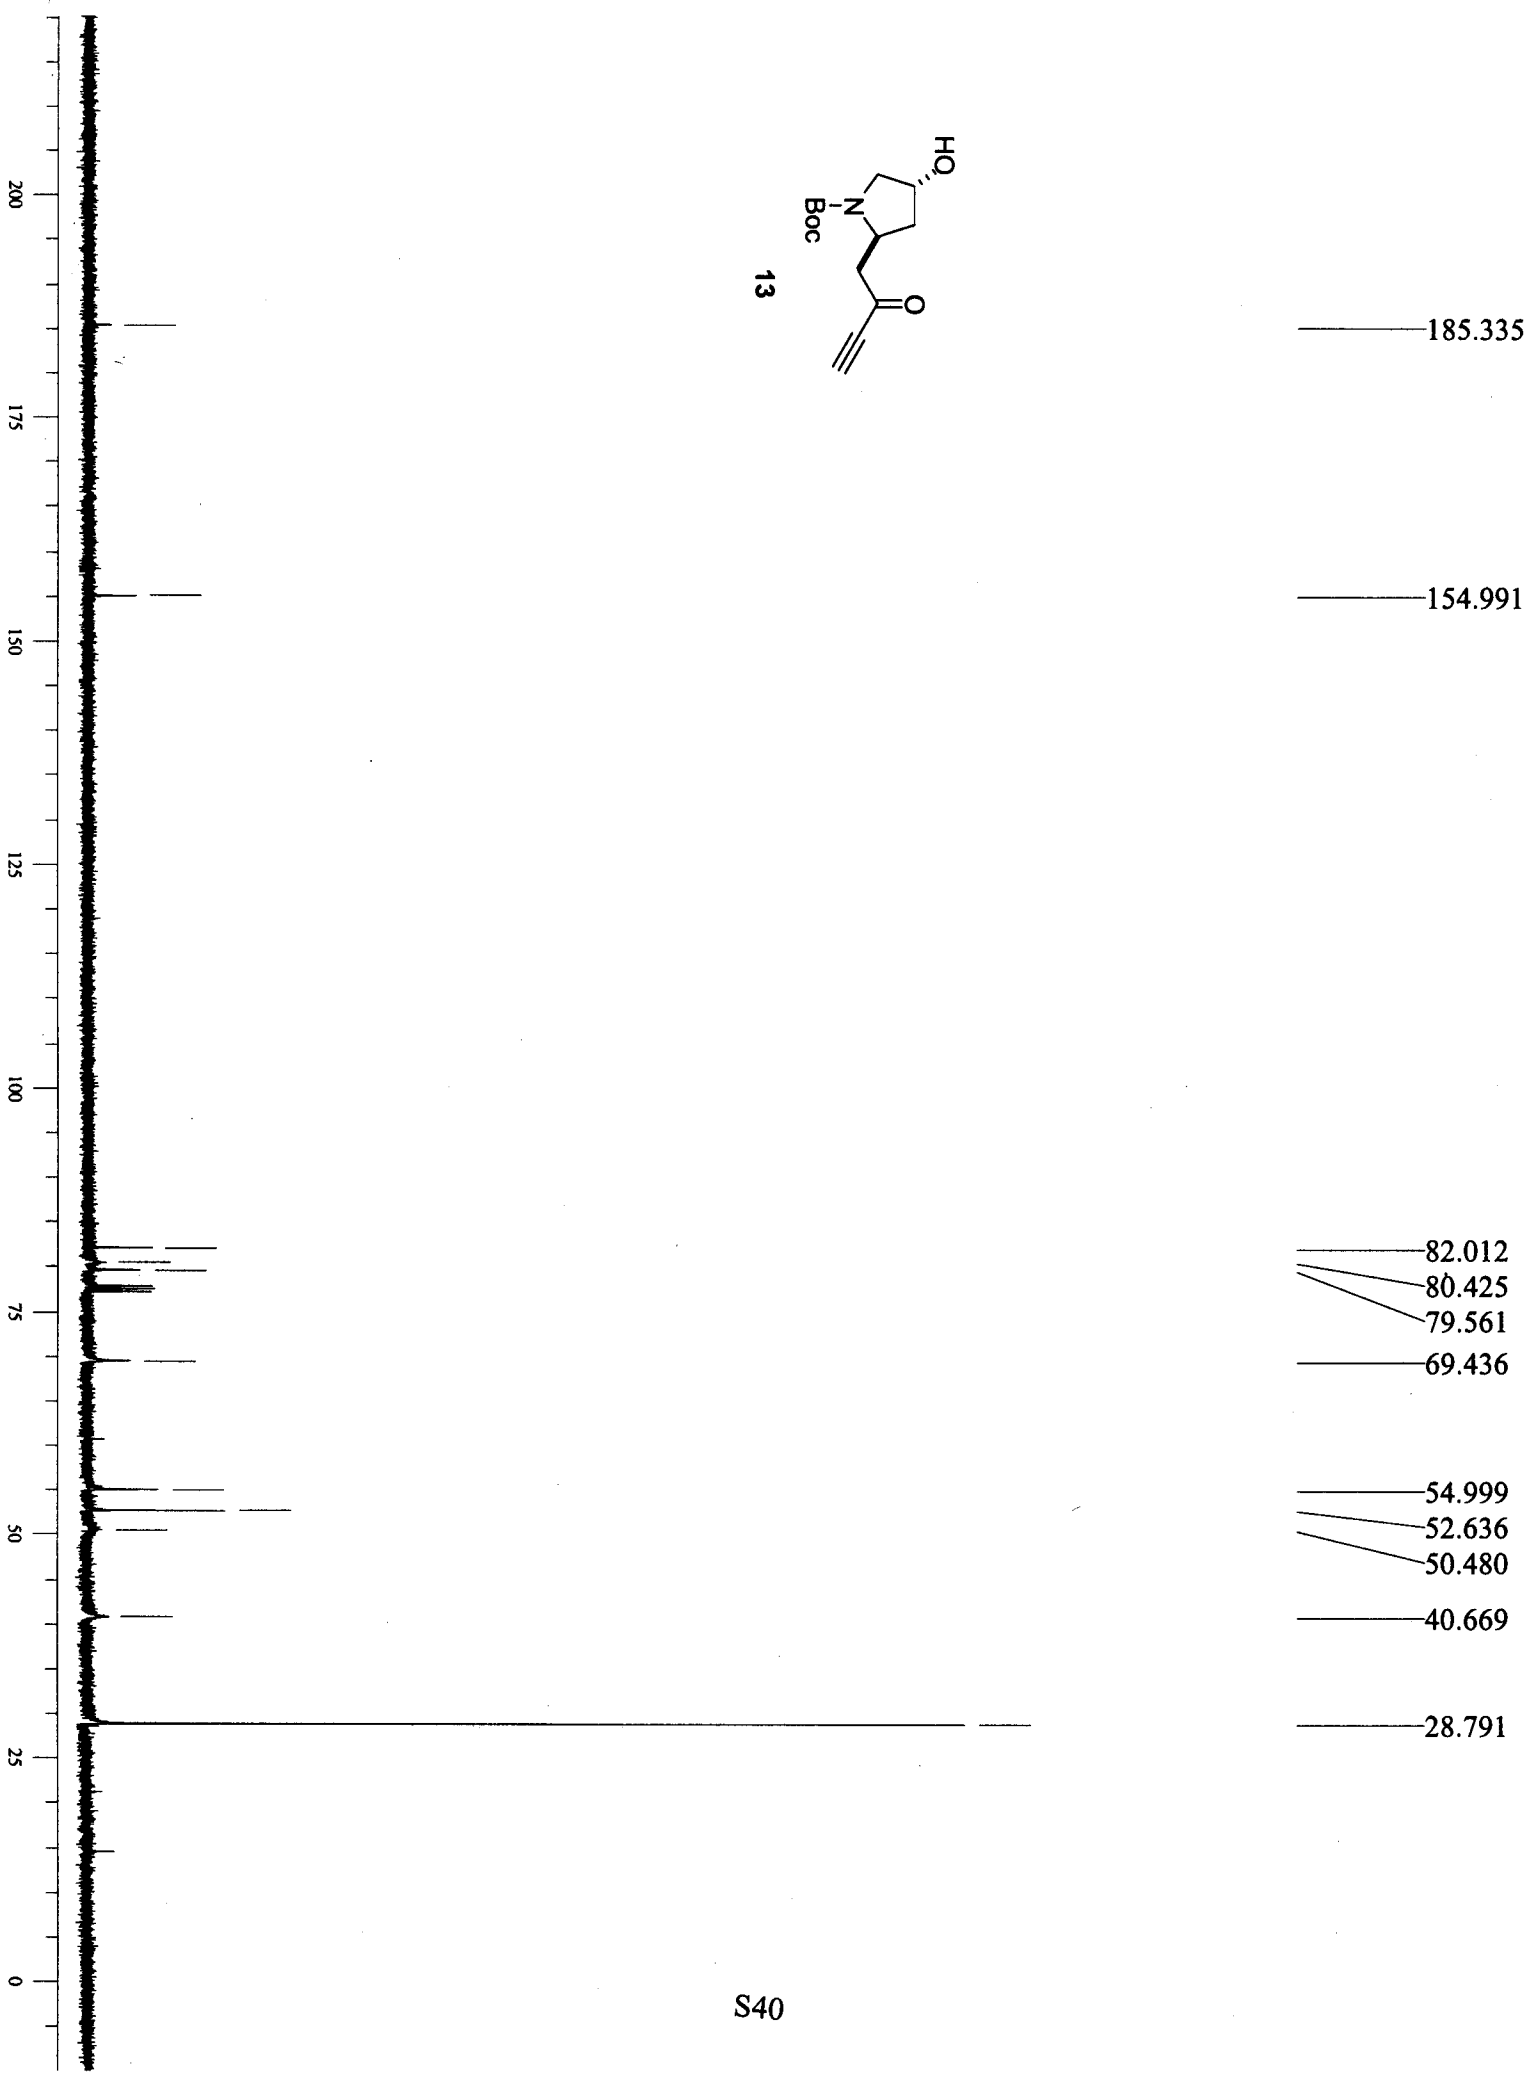



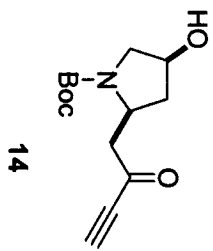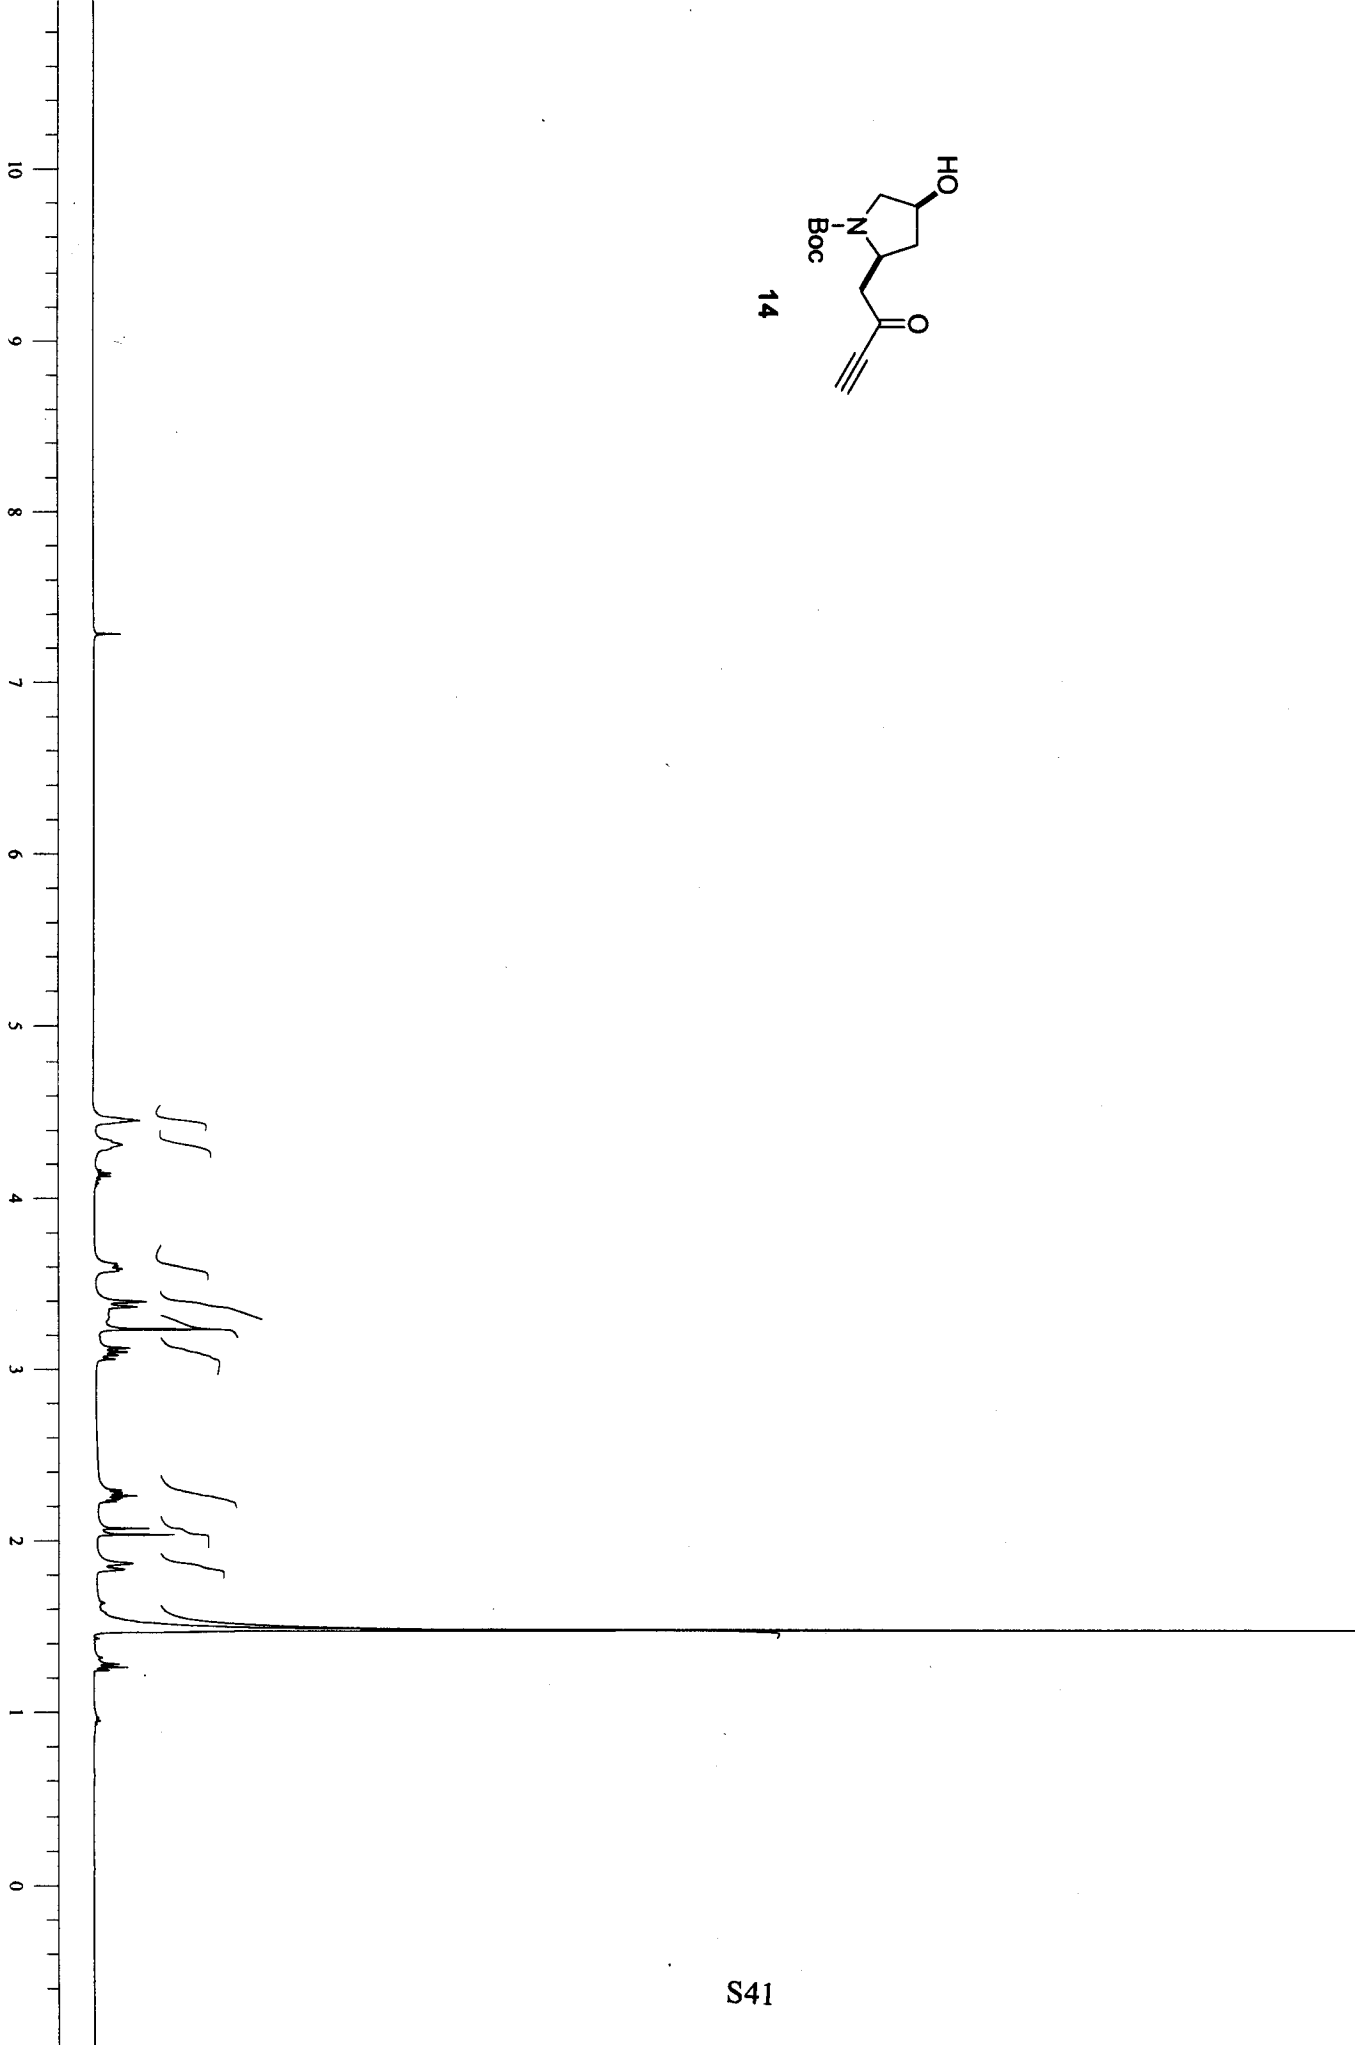

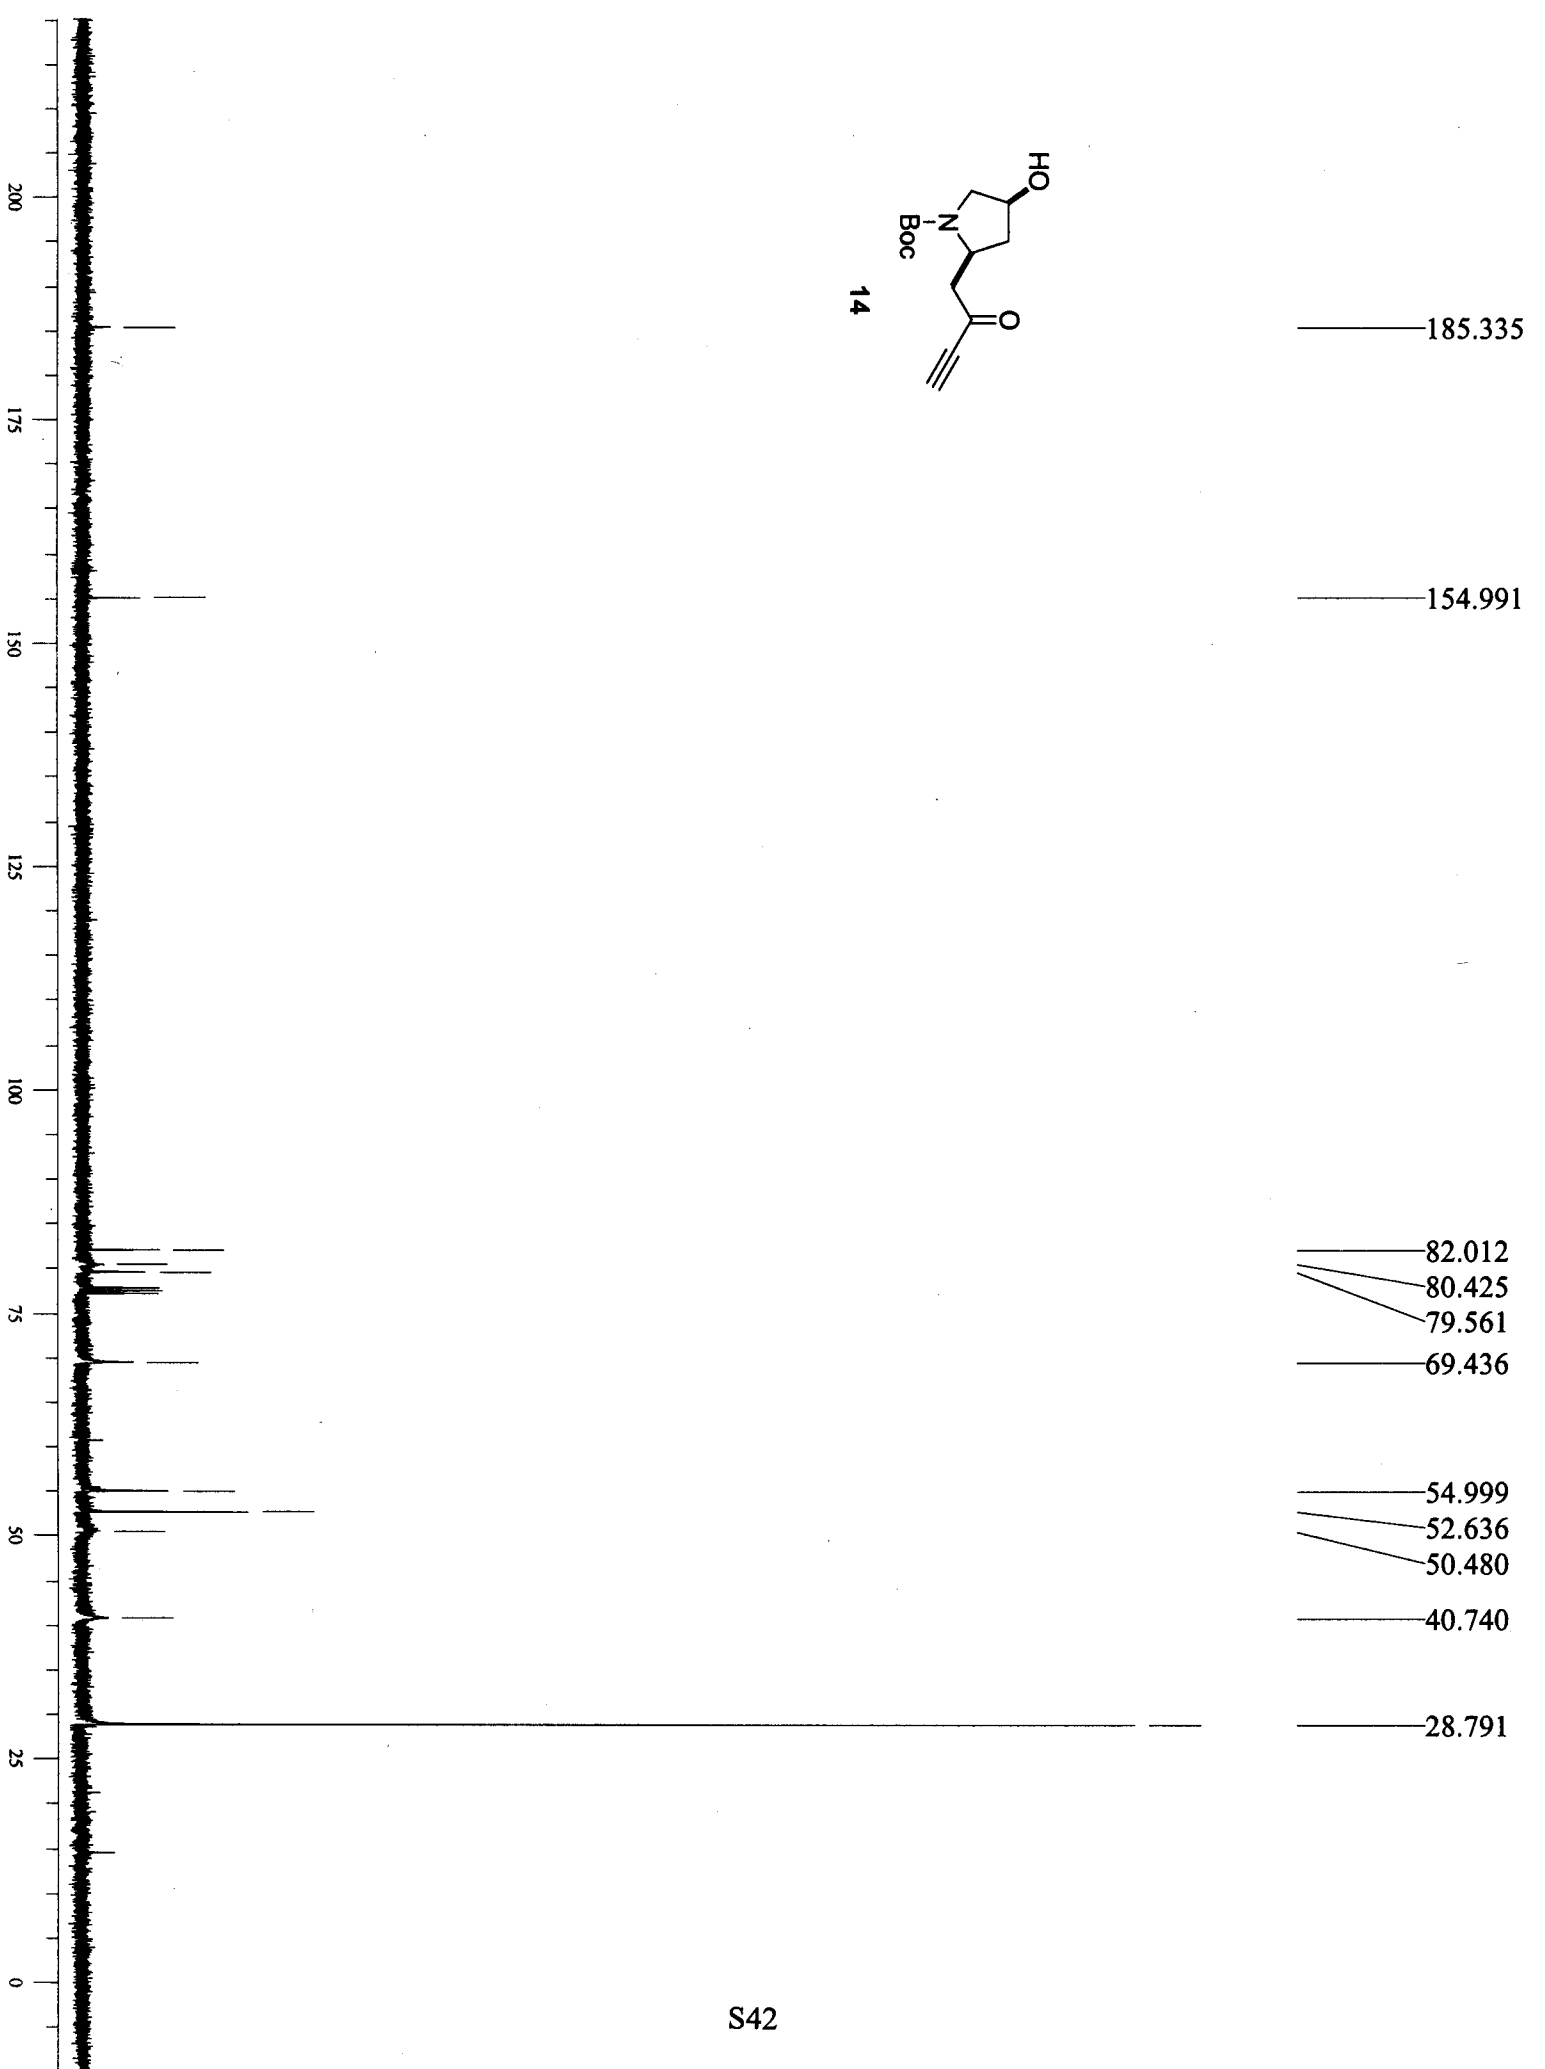

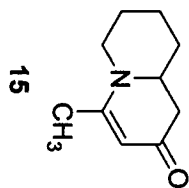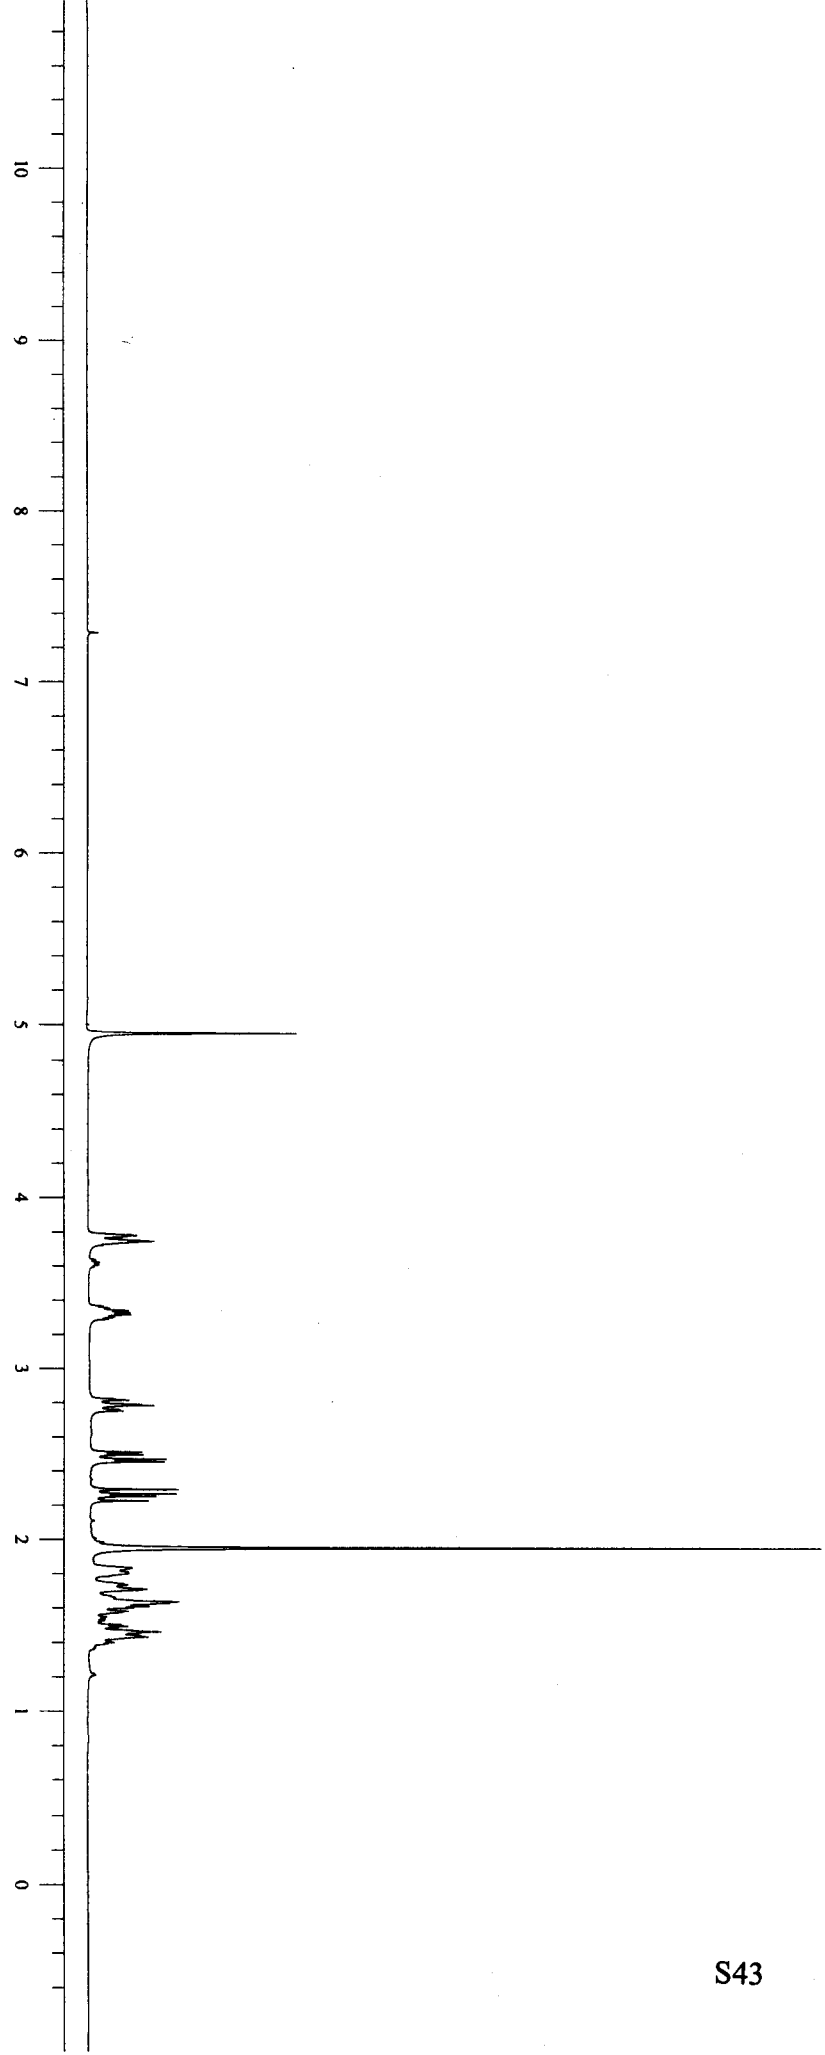

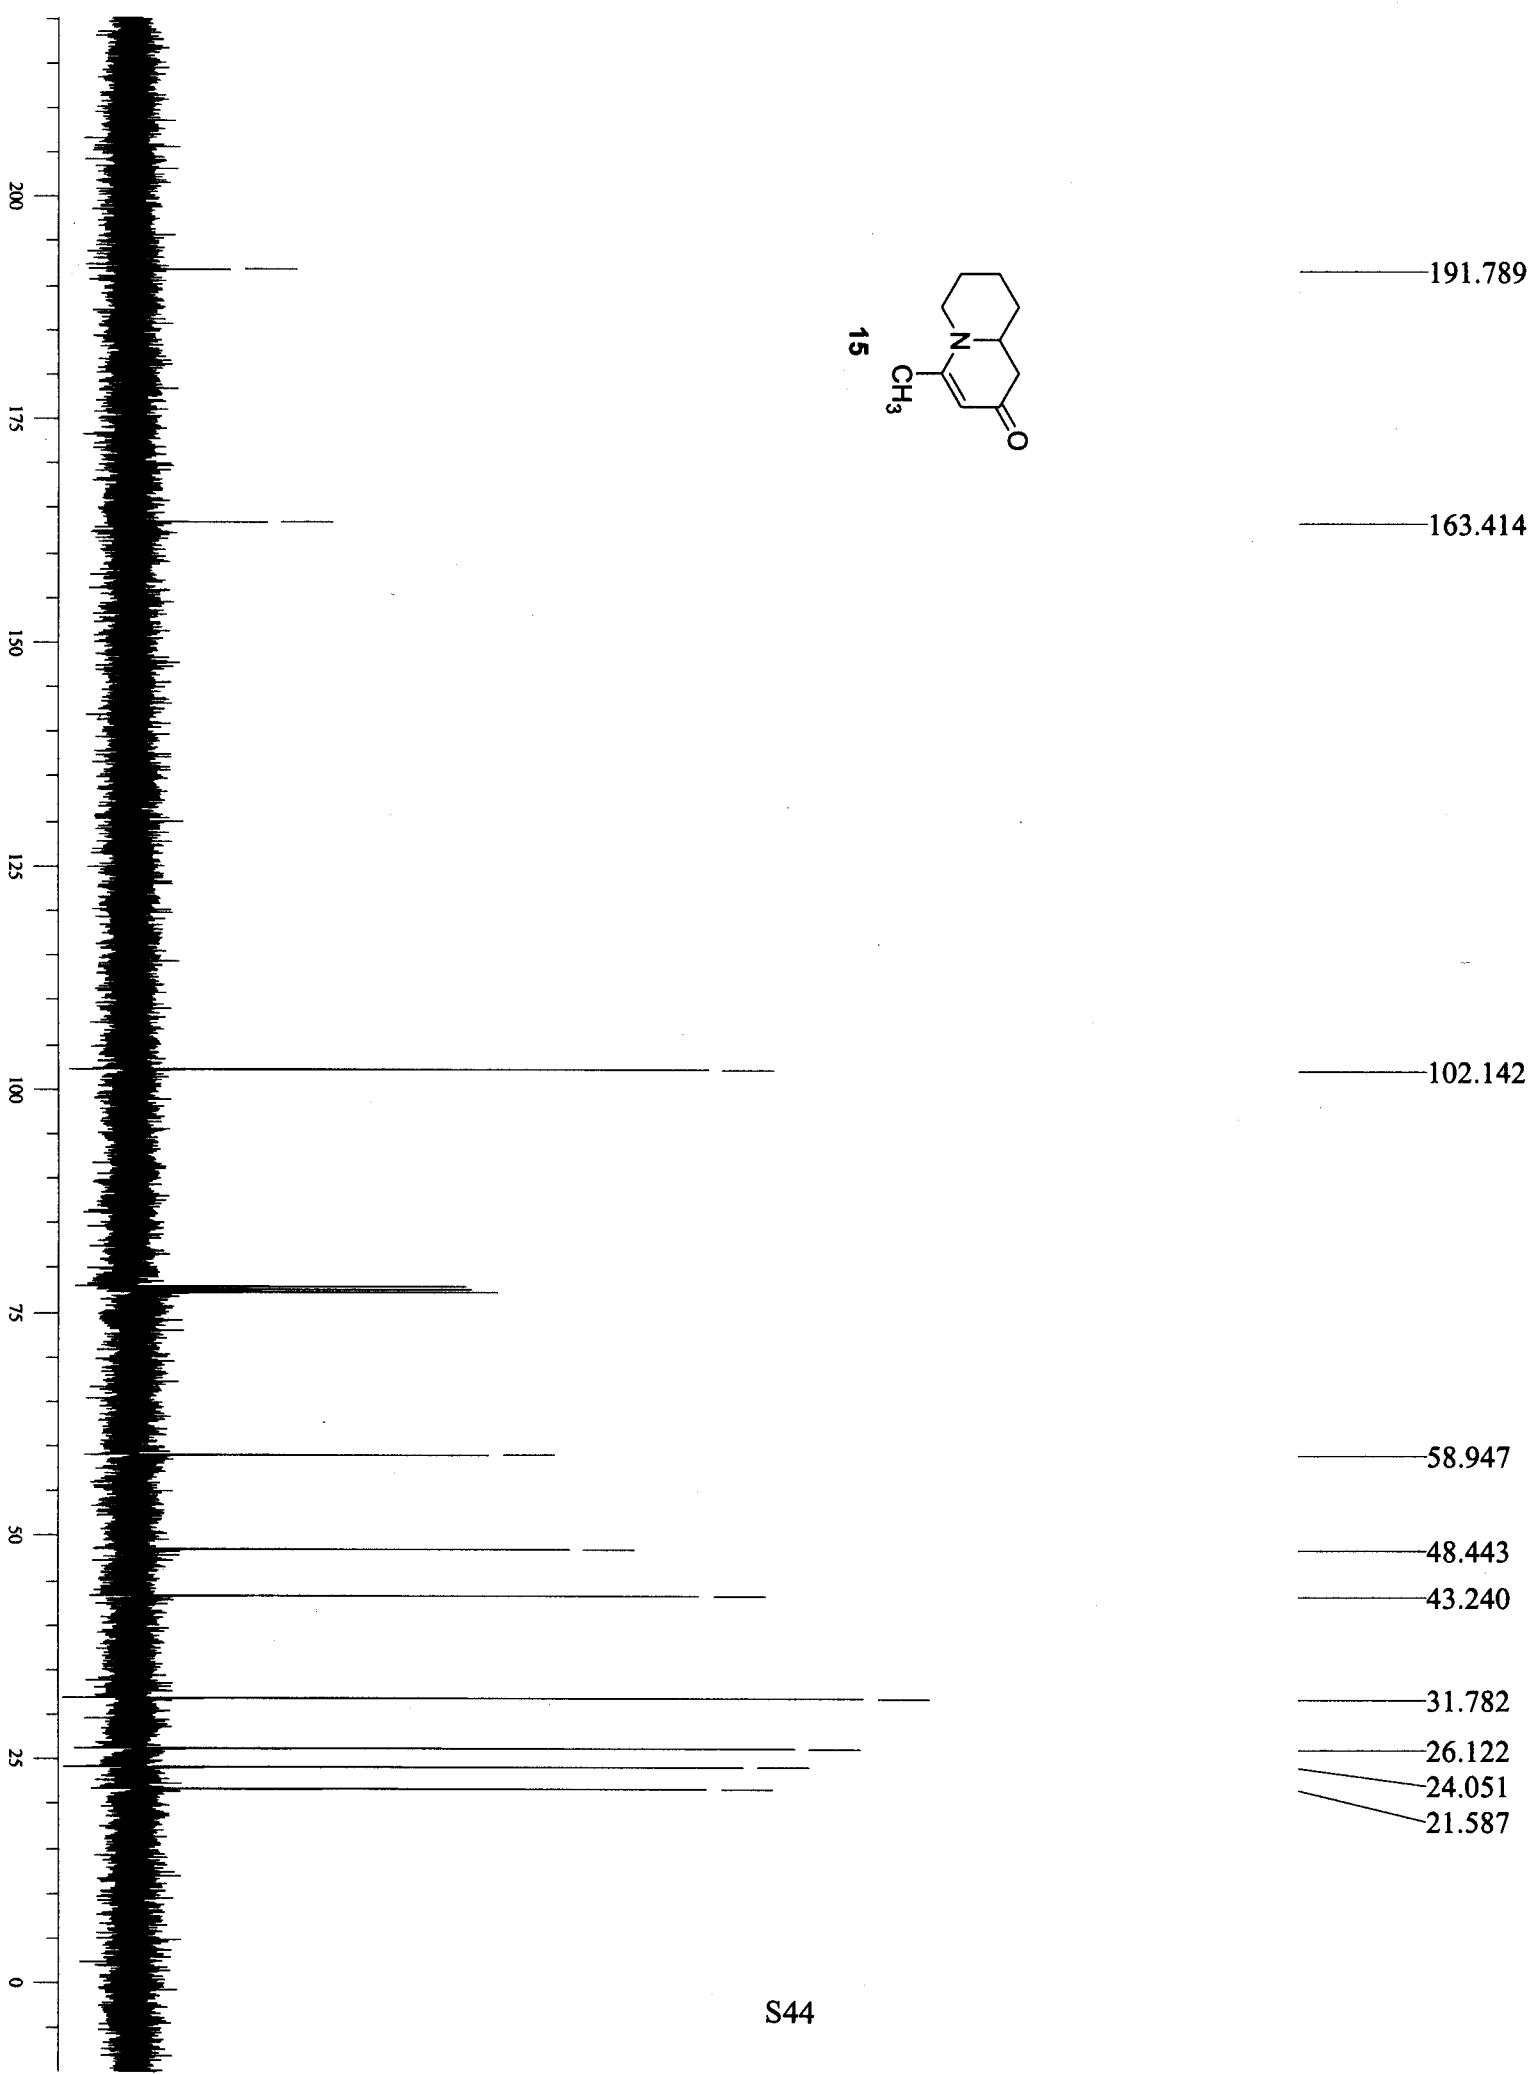

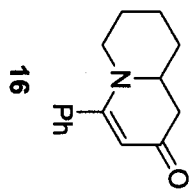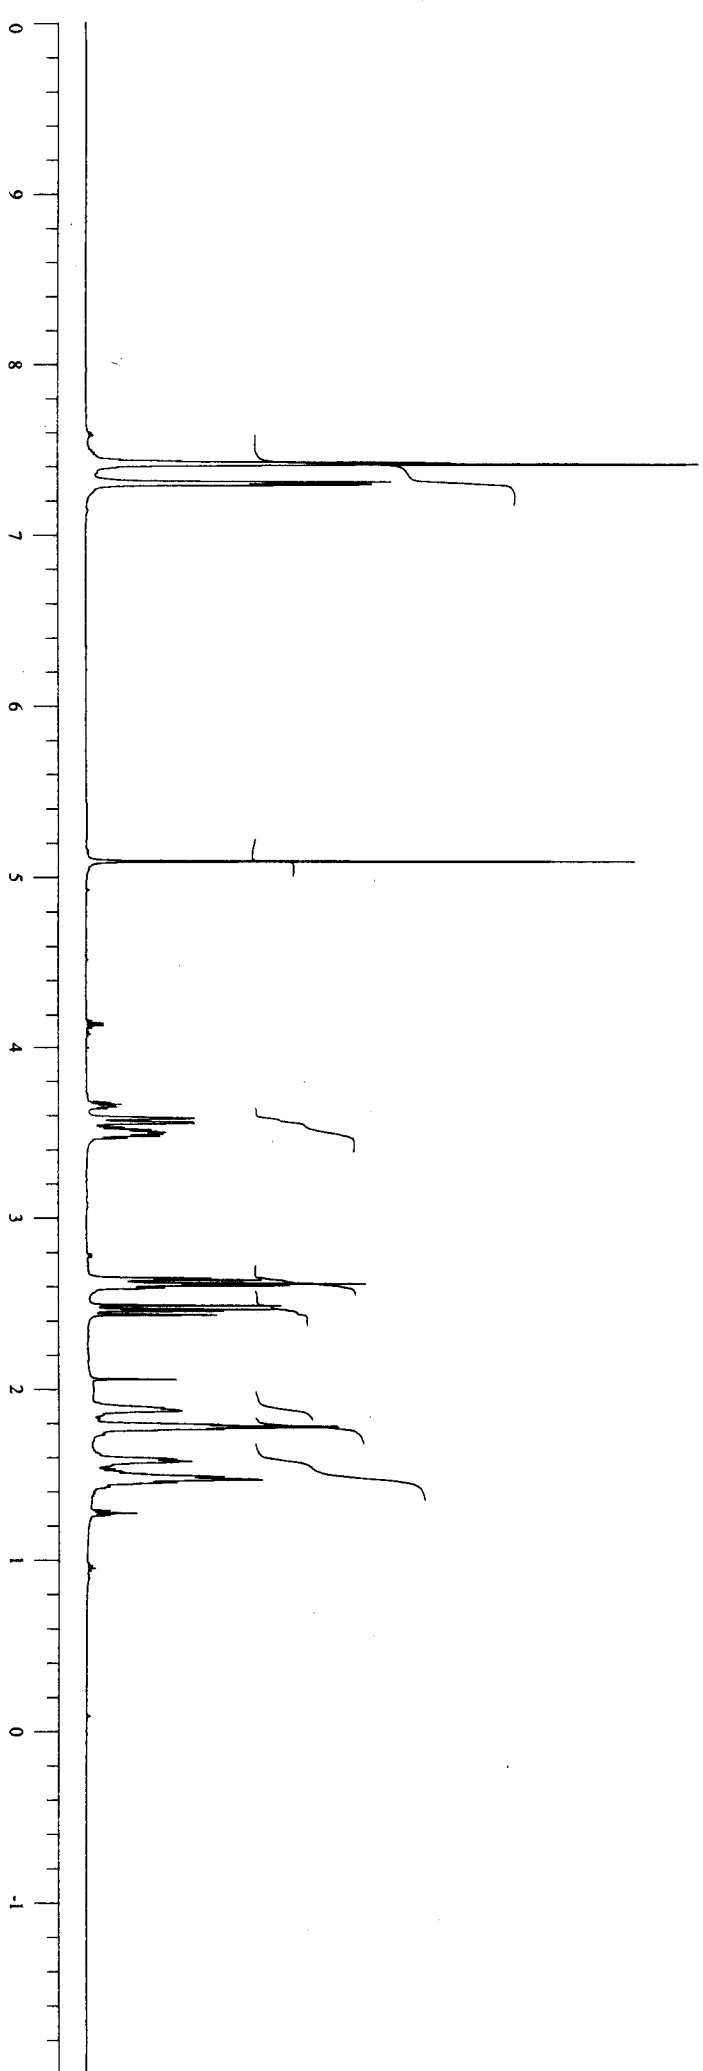

ppm

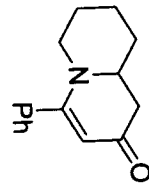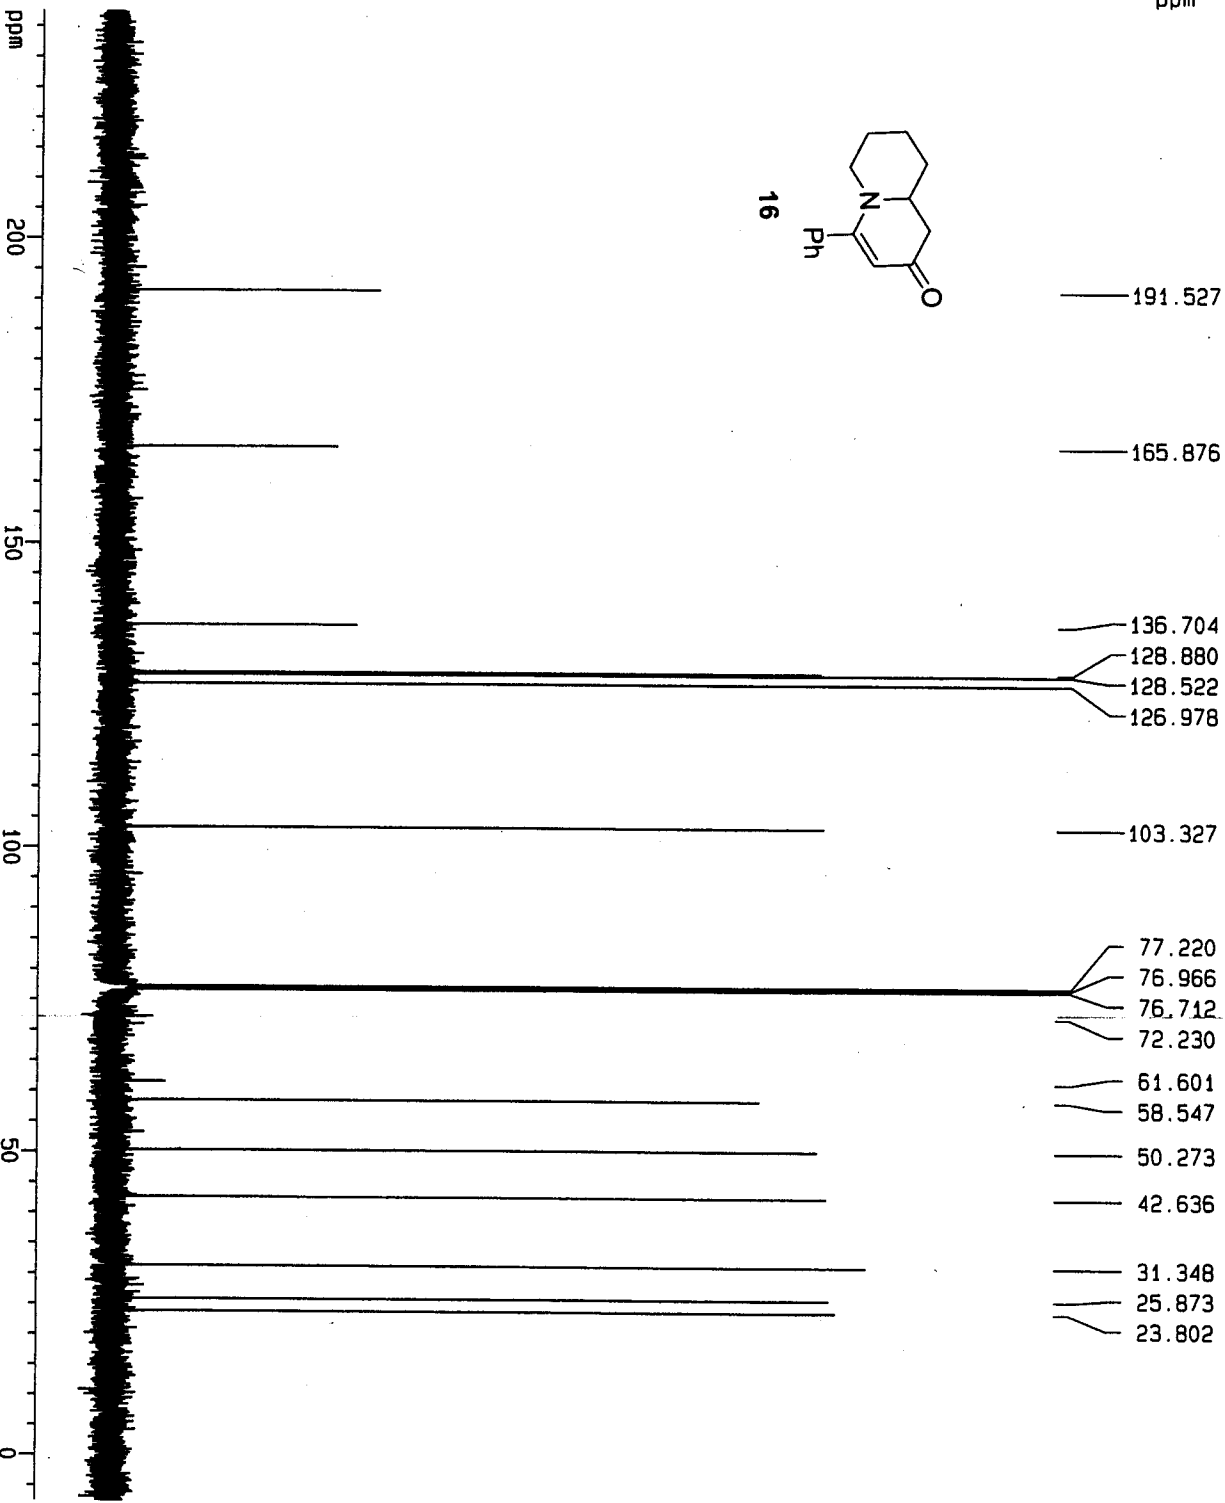

Current Data Parameters  
 NAME Bu14-31c  
 EXPNO 2  
 PROCNO 1

F2 - Acquisition Parameters  
 Date\_ 20031023  
 Time 16.39  
 INSTRUM spect  
 PROBRD 5 mm BBO BB-1H  
 PULPROG zgpg30  
 TD 280030  
 F2 65536  
 SOLVENT CDCl3  
 NS 328  
 DS 4  
 SMH 31446.541 Hz  
 FIDRES 0.473838 Hz  
 AQ 1.0420893 sec  
 RG 2048  
 DW 15.900 usec  
 DE 6.00 usec  
 TE 300.0 K  
 D1 0.10000000 sec  
 d11 0.03000000 sec  
 d12 0.00002000 sec

\*\*\*\*\* CHANNEL f1 \*\*\*\*\*  
 NUC1 13C  
 P1 6.50 usec  
 PL1 5.00 dB  
 SF01 125.7719472 MHz

\*\*\*\*\* CHANNEL f2 \*\*\*\*\*  
 CPDPRG2 waltz16  
 NUC2 1H  
 PCPD2 95.00 usec  
 PL2 -4.00 dB  
 PL12 19.00 dB  
 PL13 30.00 dB  
 SF02 500.1325000 MHz

F2 - Processing parameters  
 SI 65536  
 SF 125.7578008 MHz  
 NDM EM  
 SSB 0  
 LB 1.00 Hz  
 GB 0  
 PC 1.40

F1 - Processing parameters  
 SI 1024  
 MC2 GF  
 SF 500.1300000 MHz  
 NDM no  
 SSB 0  
 LB 0.30 Hz  
 GB 0

1D NMR plot parameters  
 CX 20.00 cm  
 CY 0.00 cm  
 F1P 242.517 ppm  
 F2P 30498.43 Hz  
 F2 -948.11 Hz  
 PRNCH 12.50282 ppm/cm  
 HZCM 1572.32703 Hz/cm

4-39

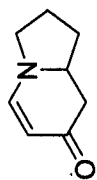

17

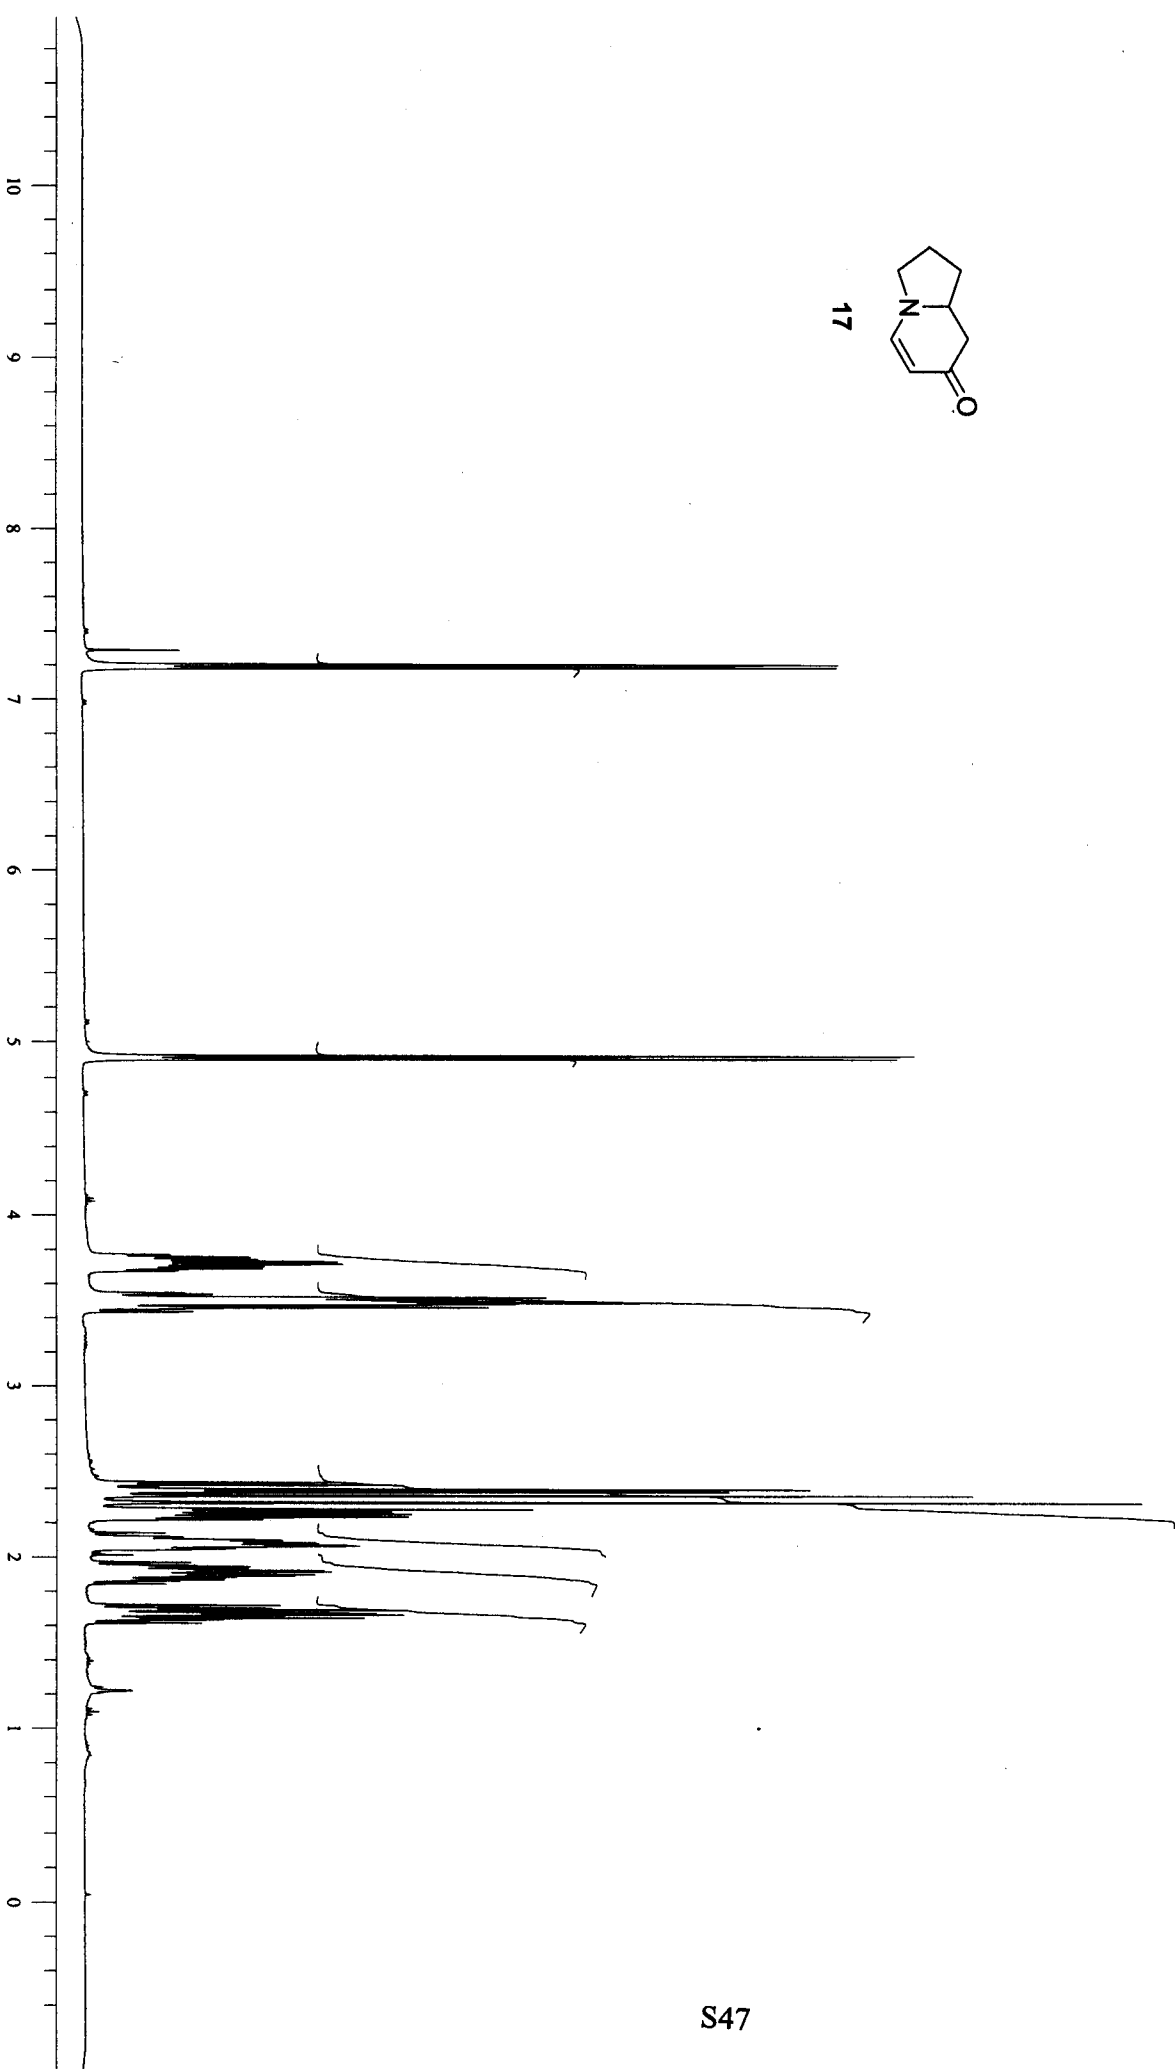

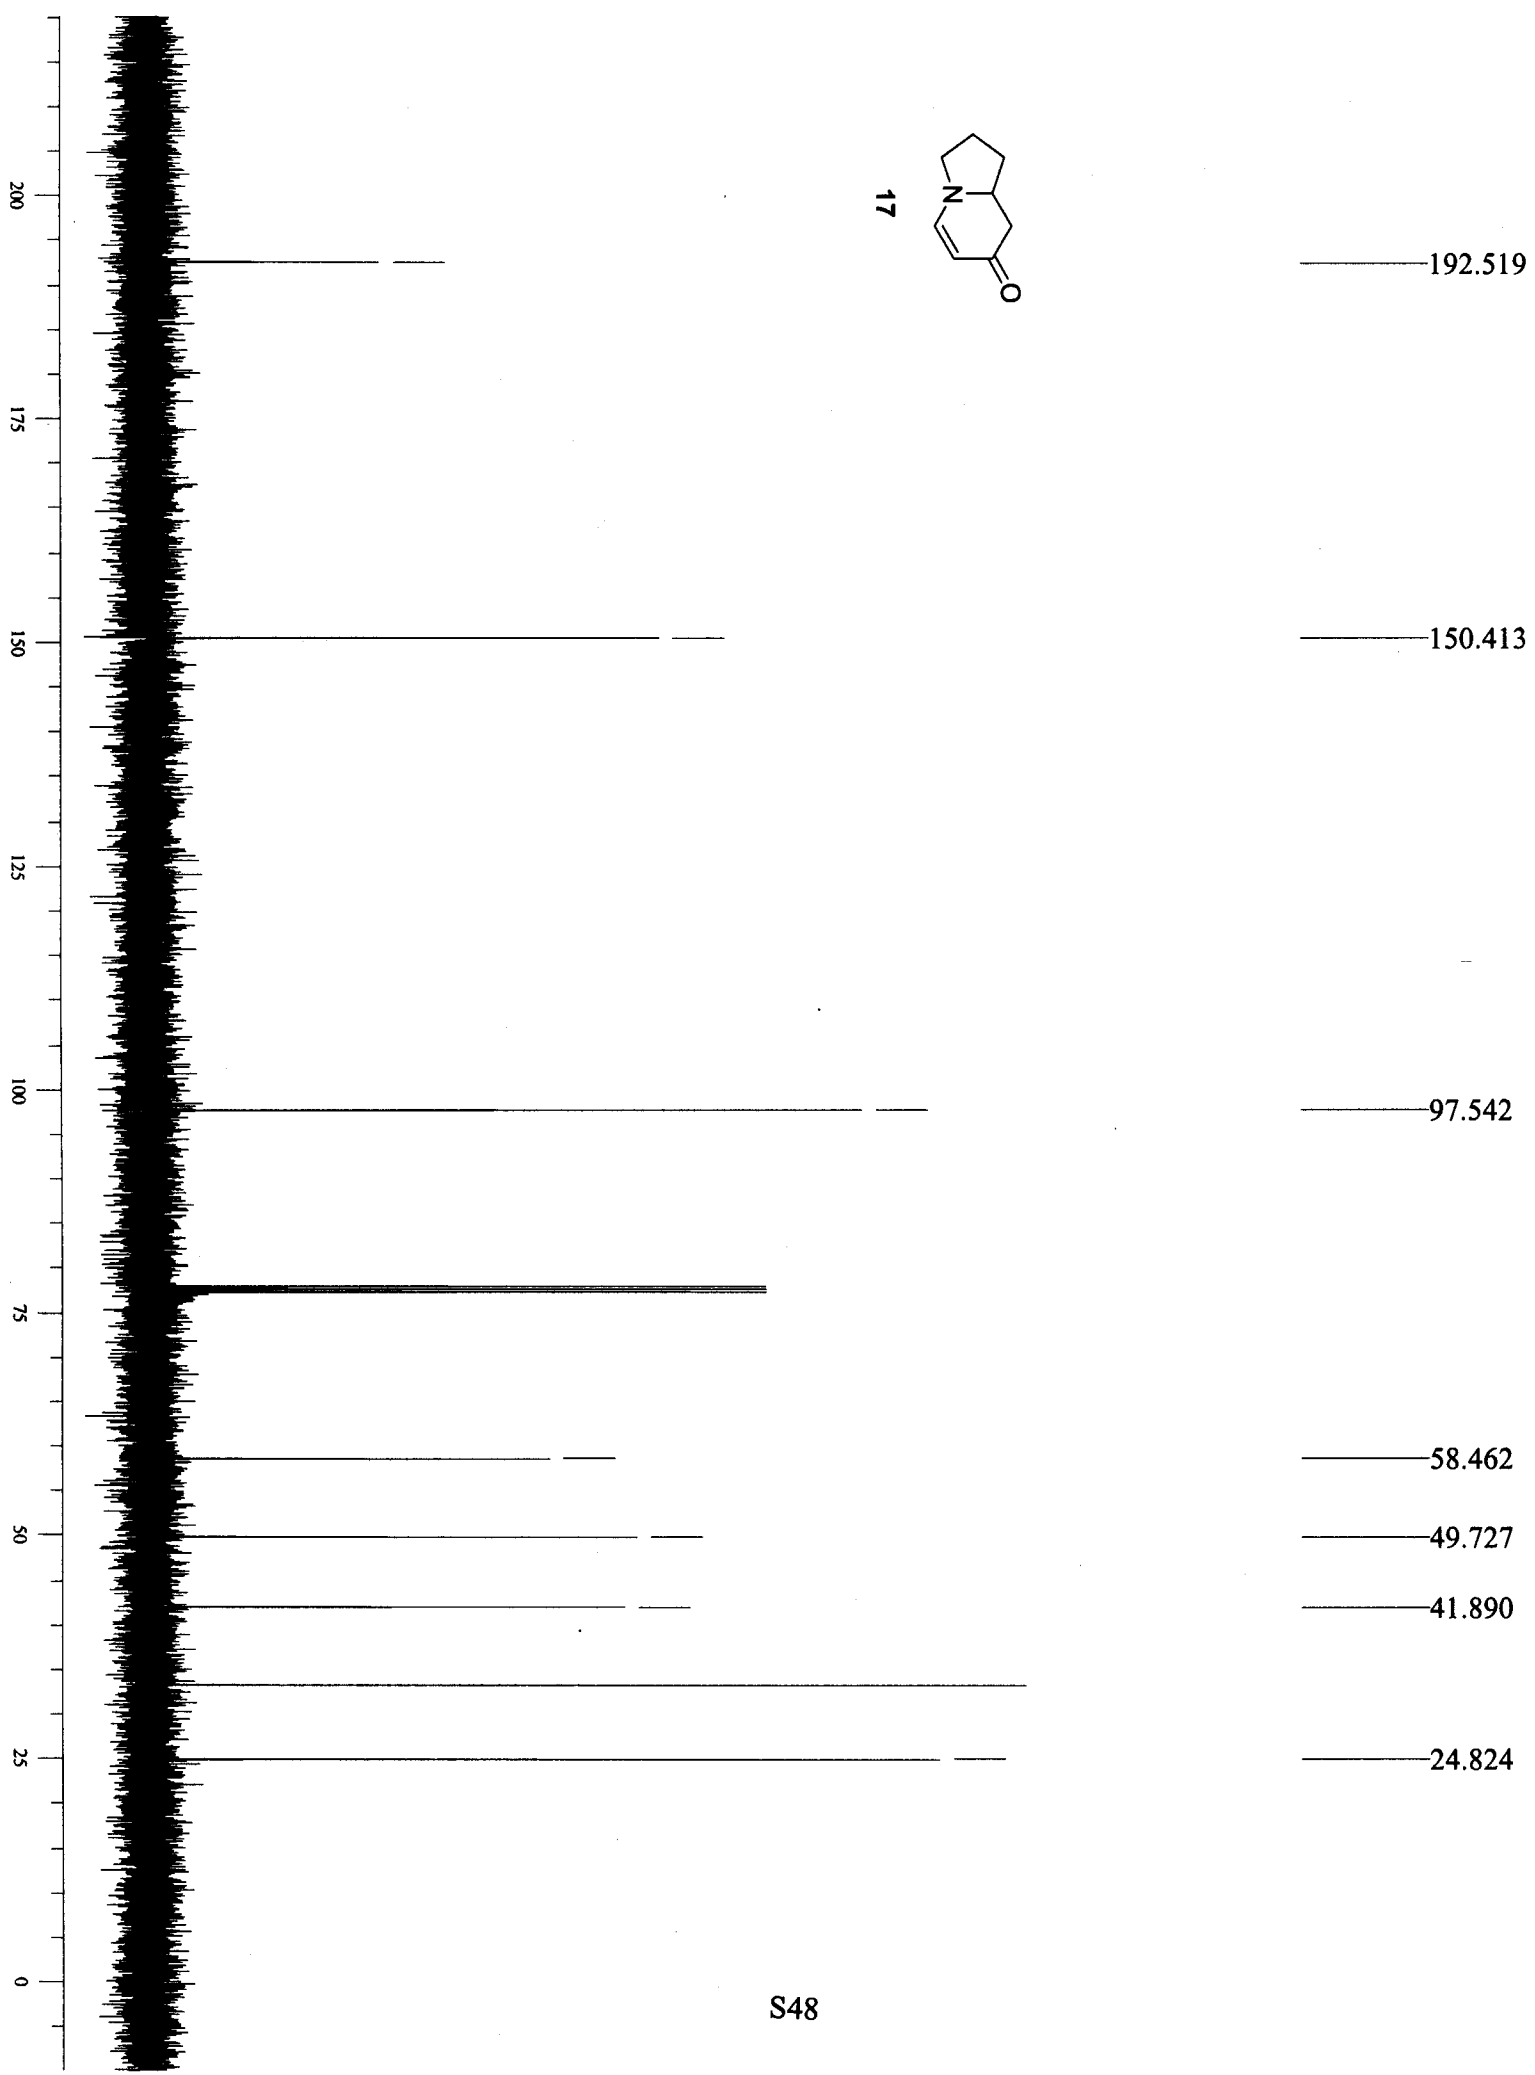



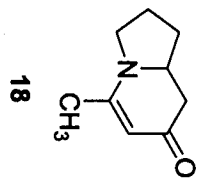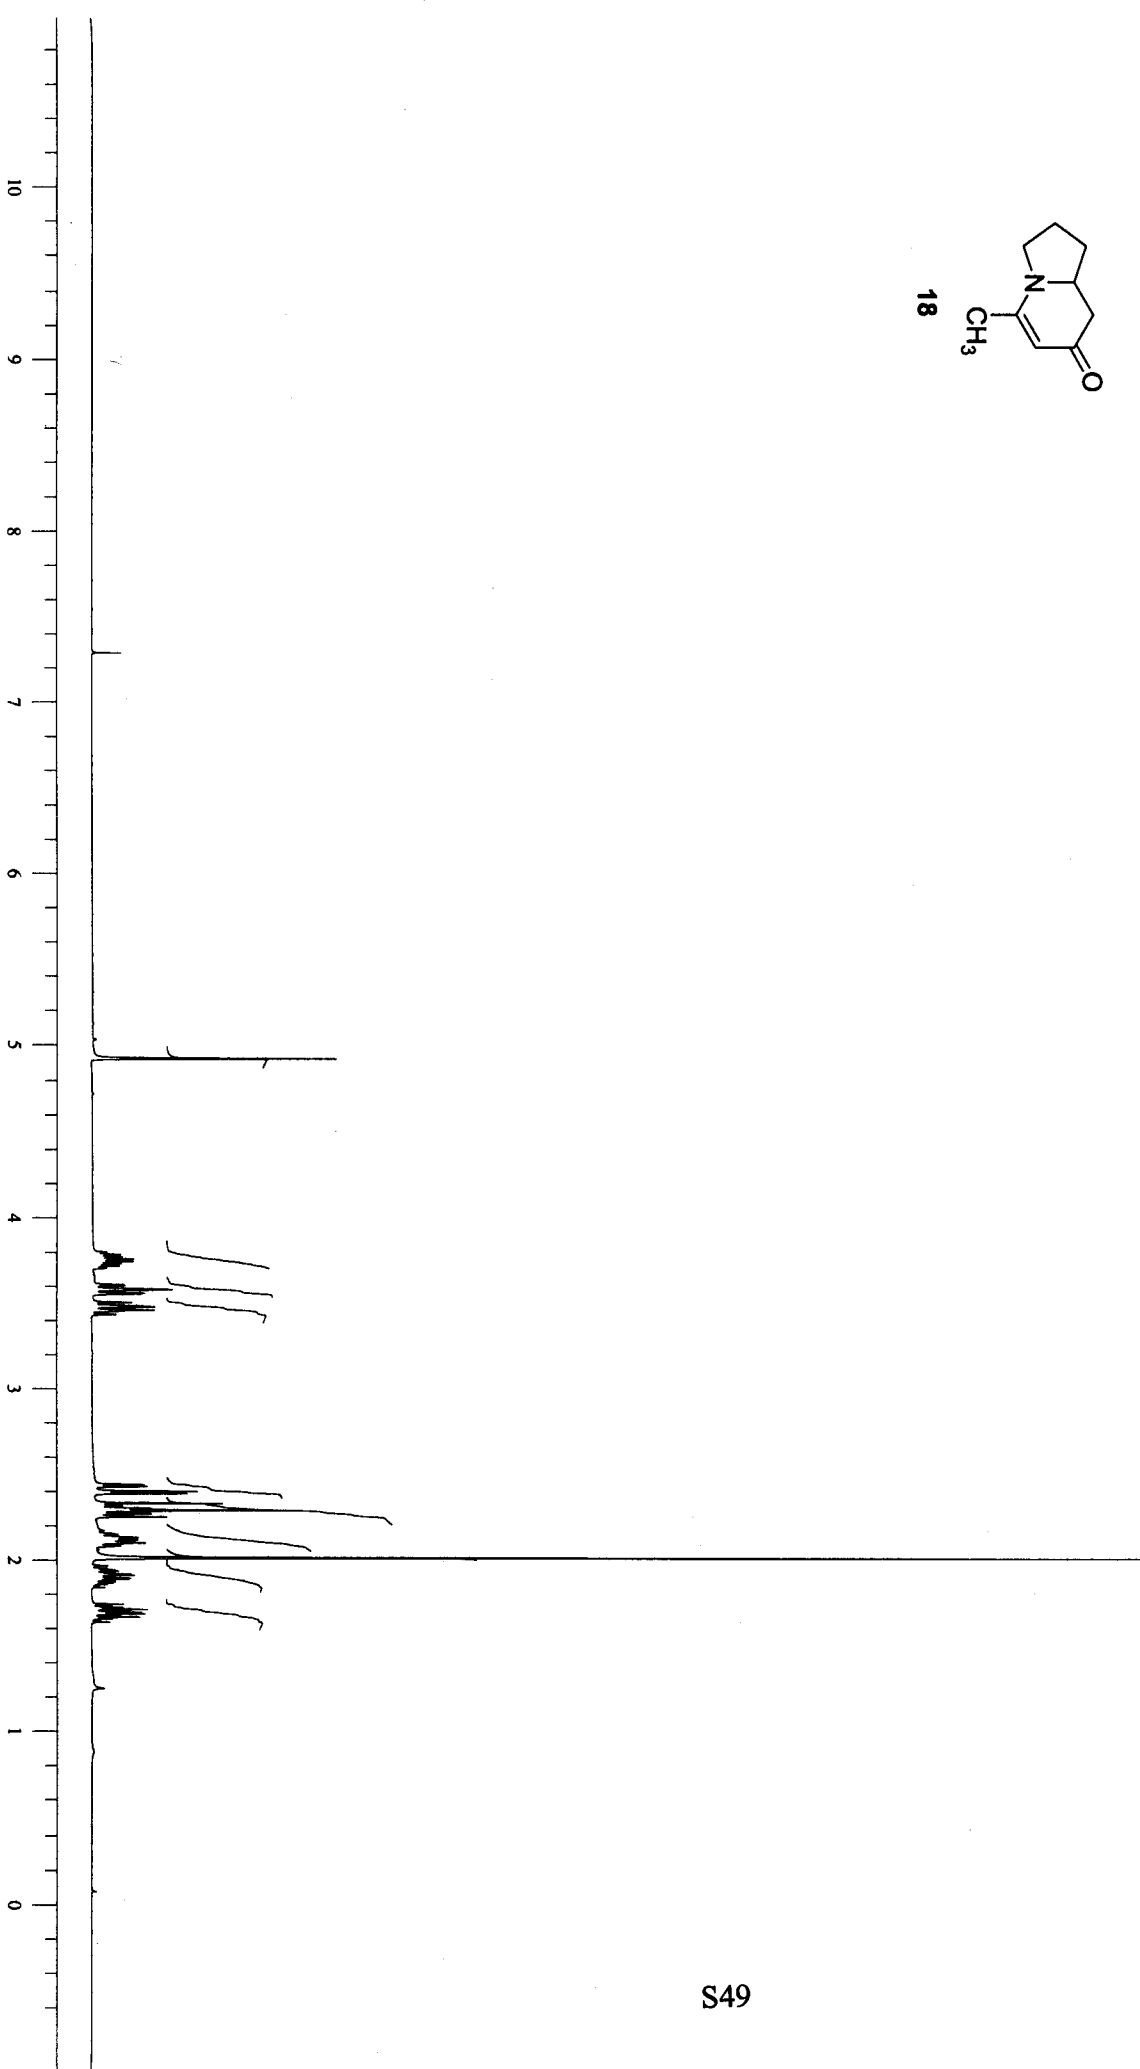

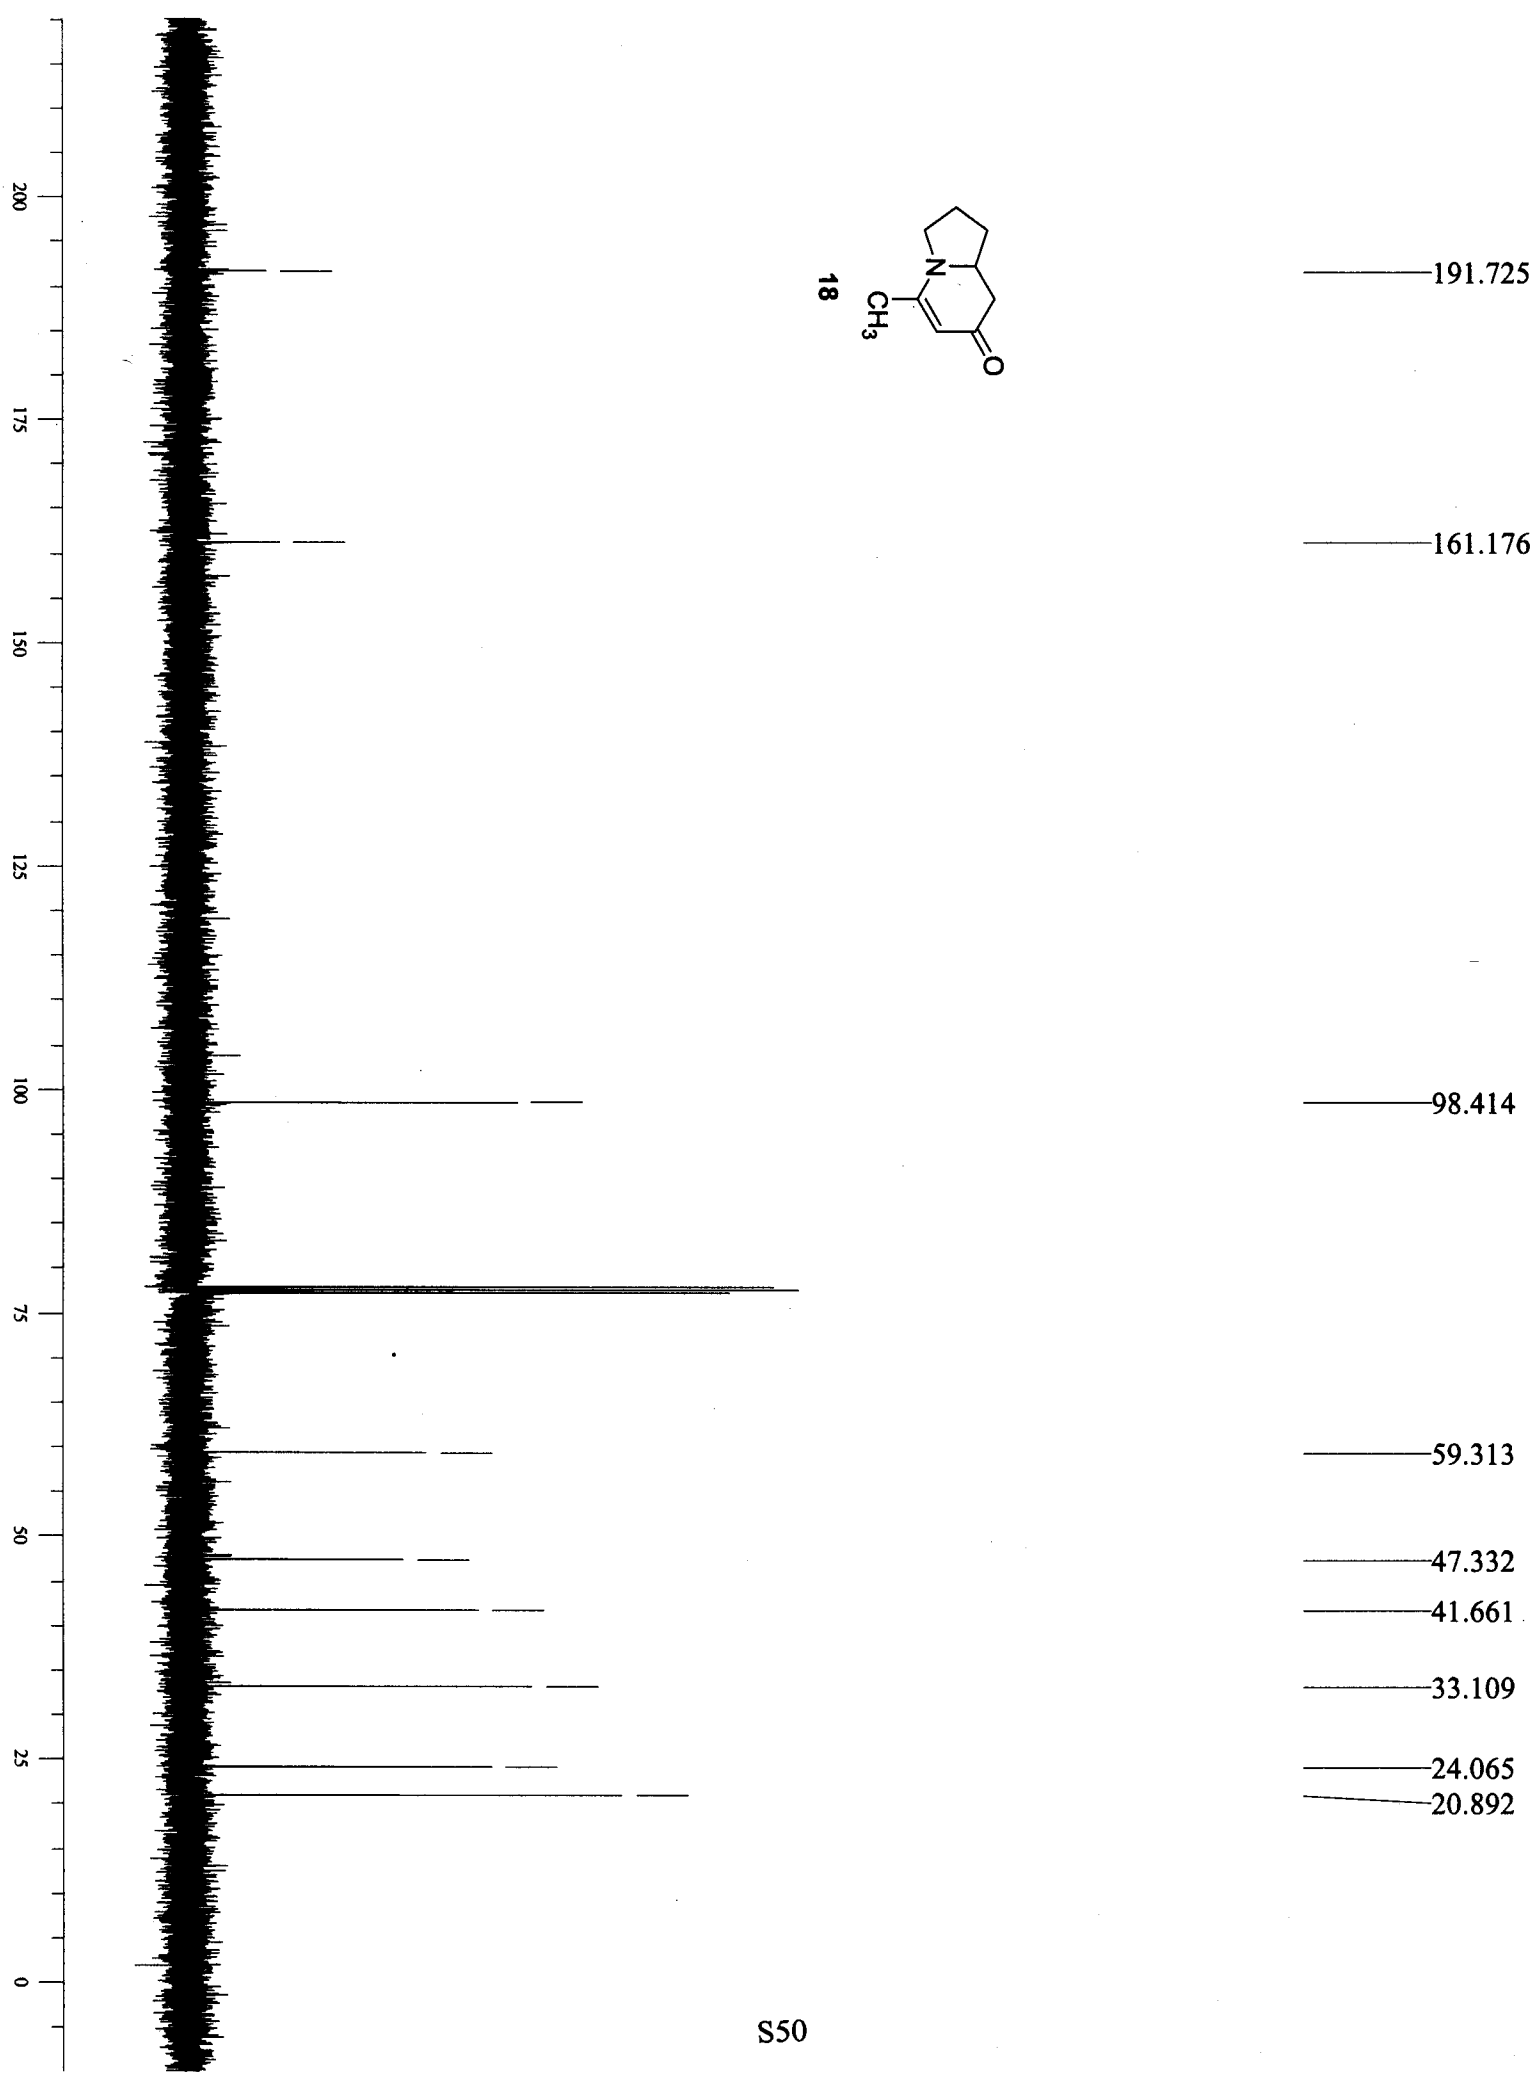

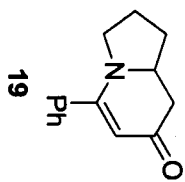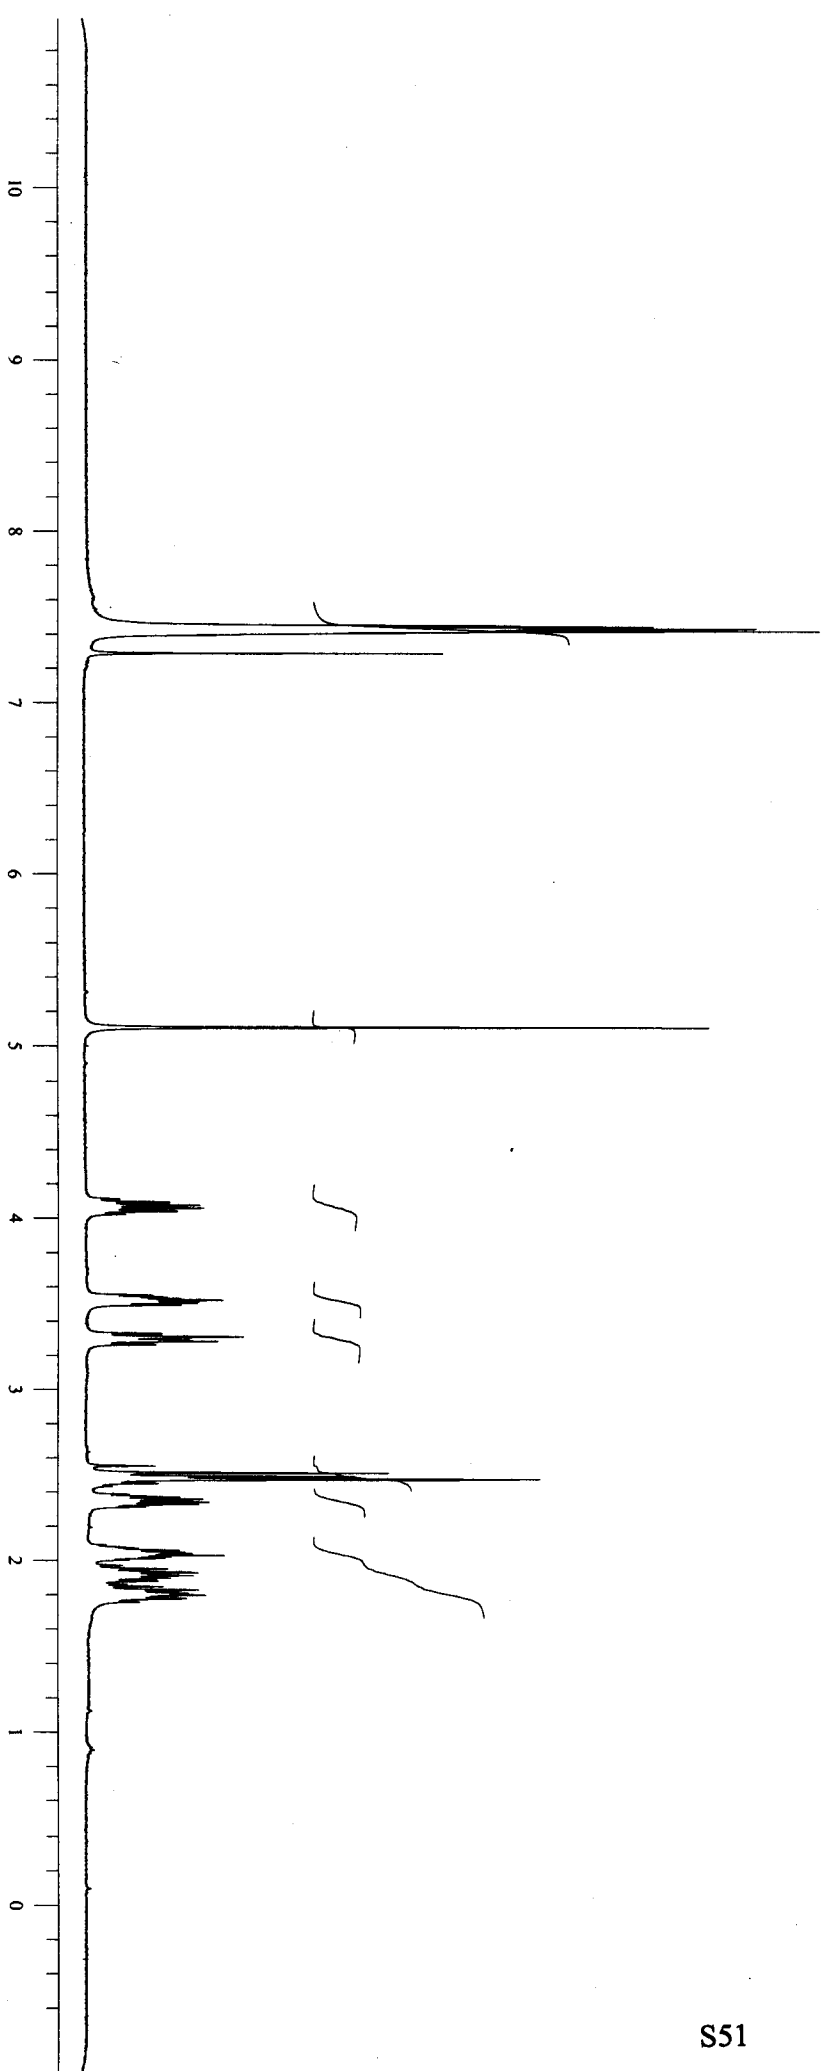

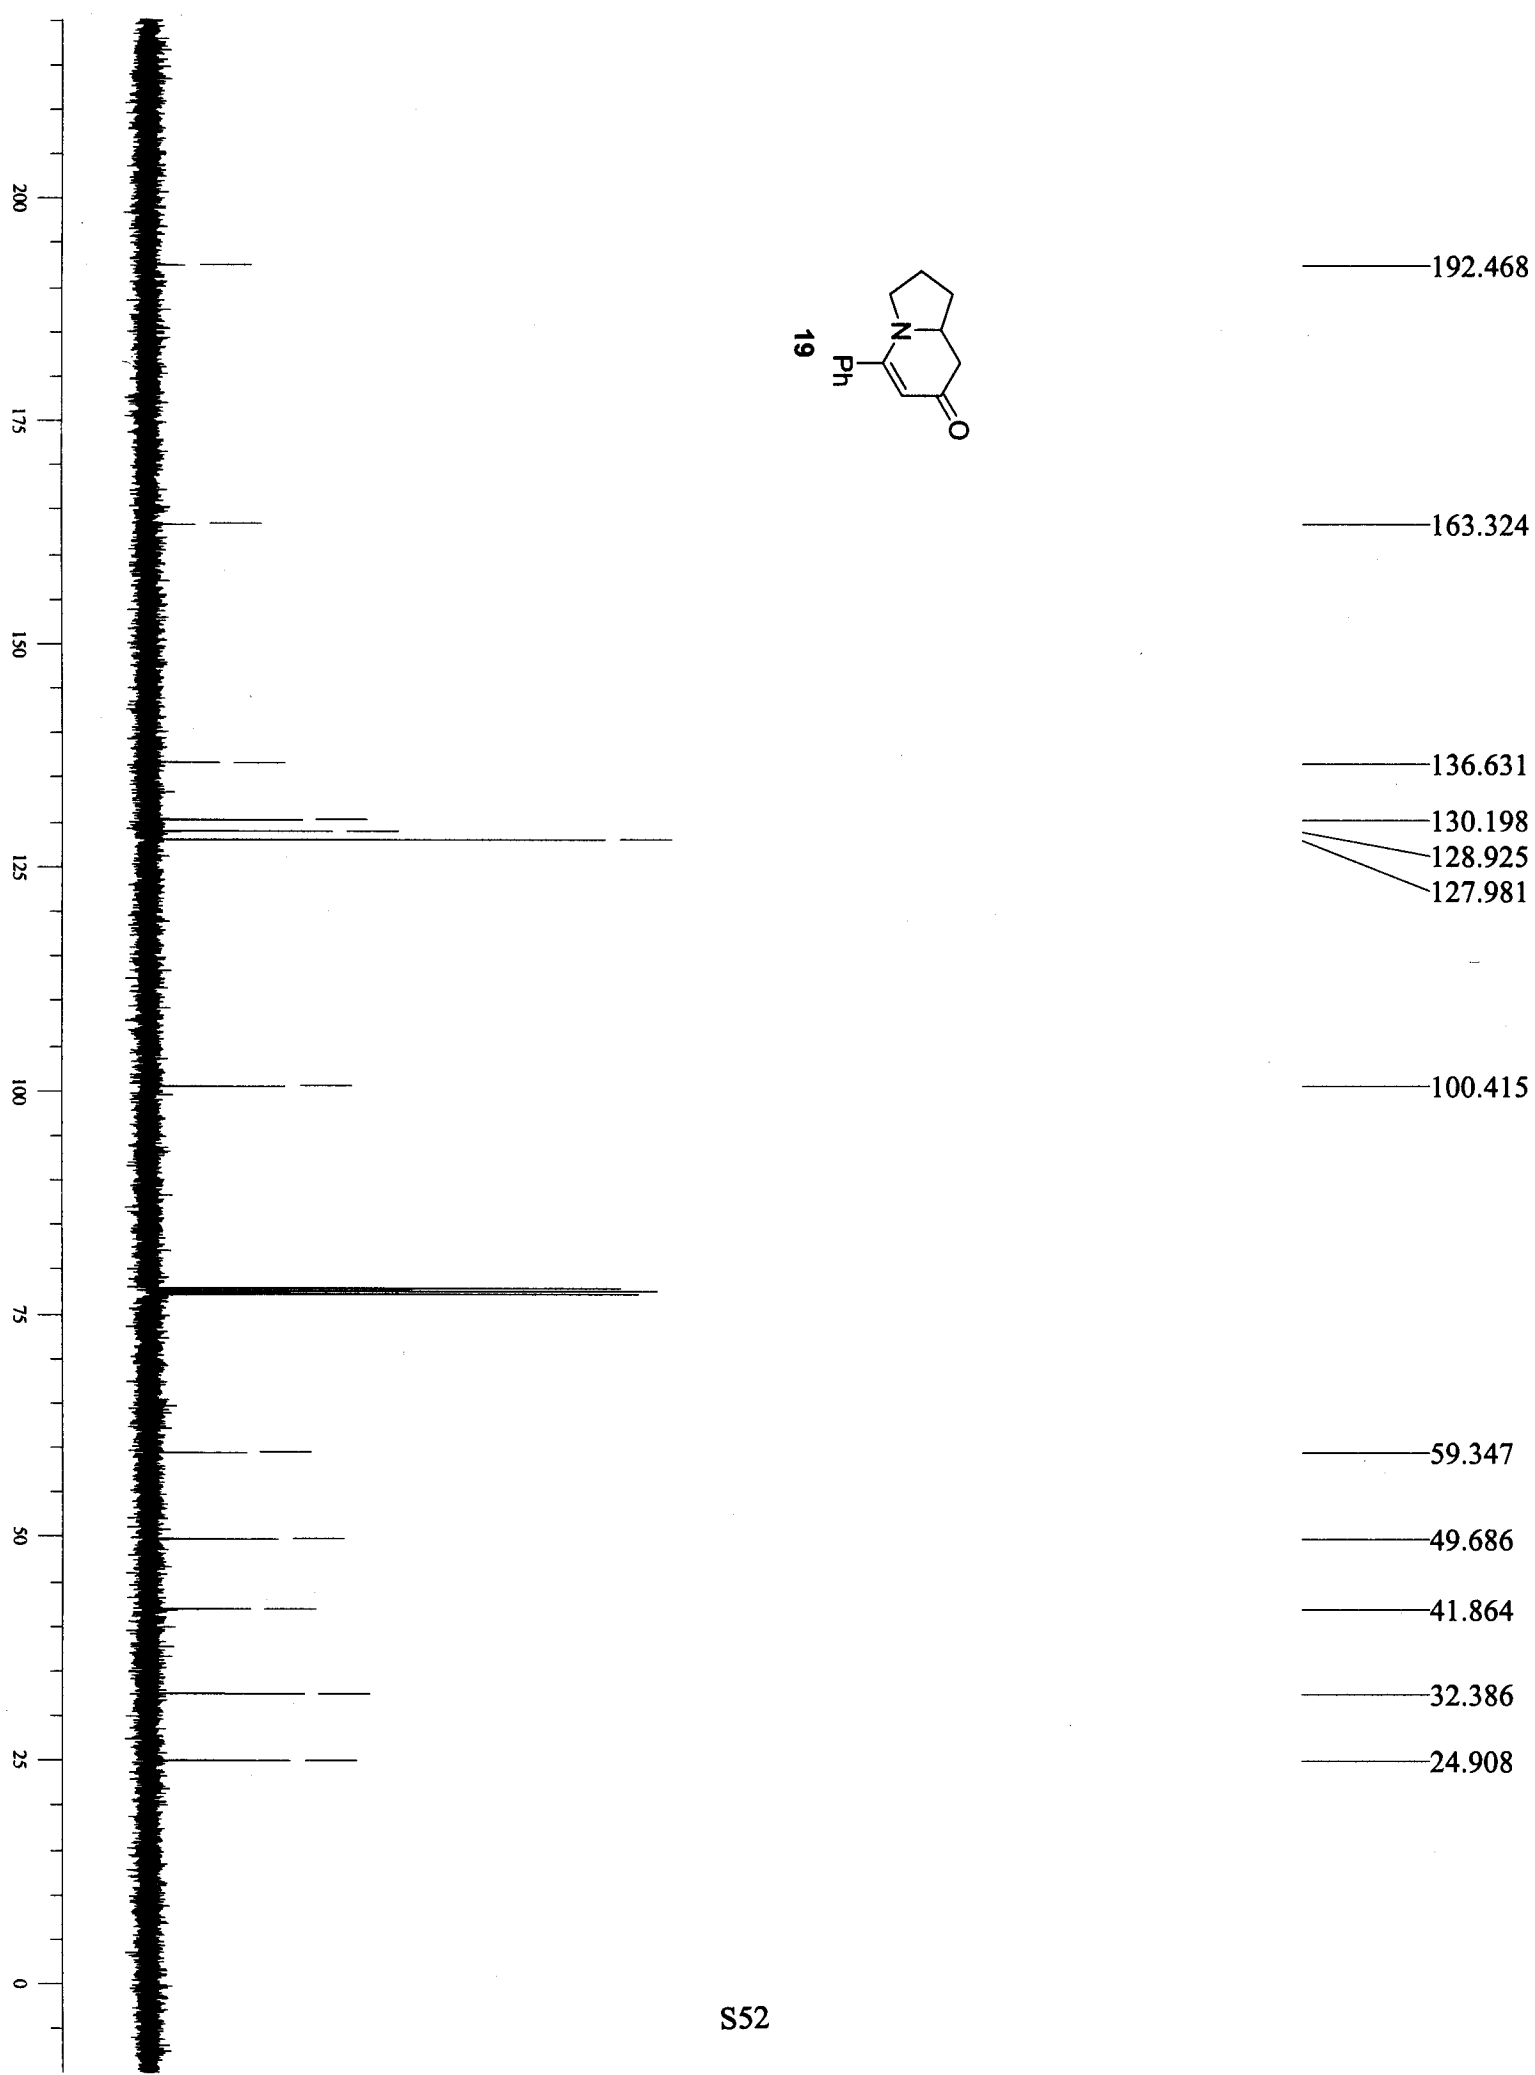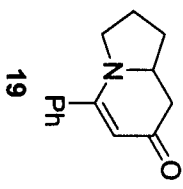

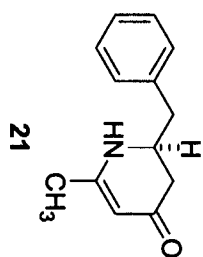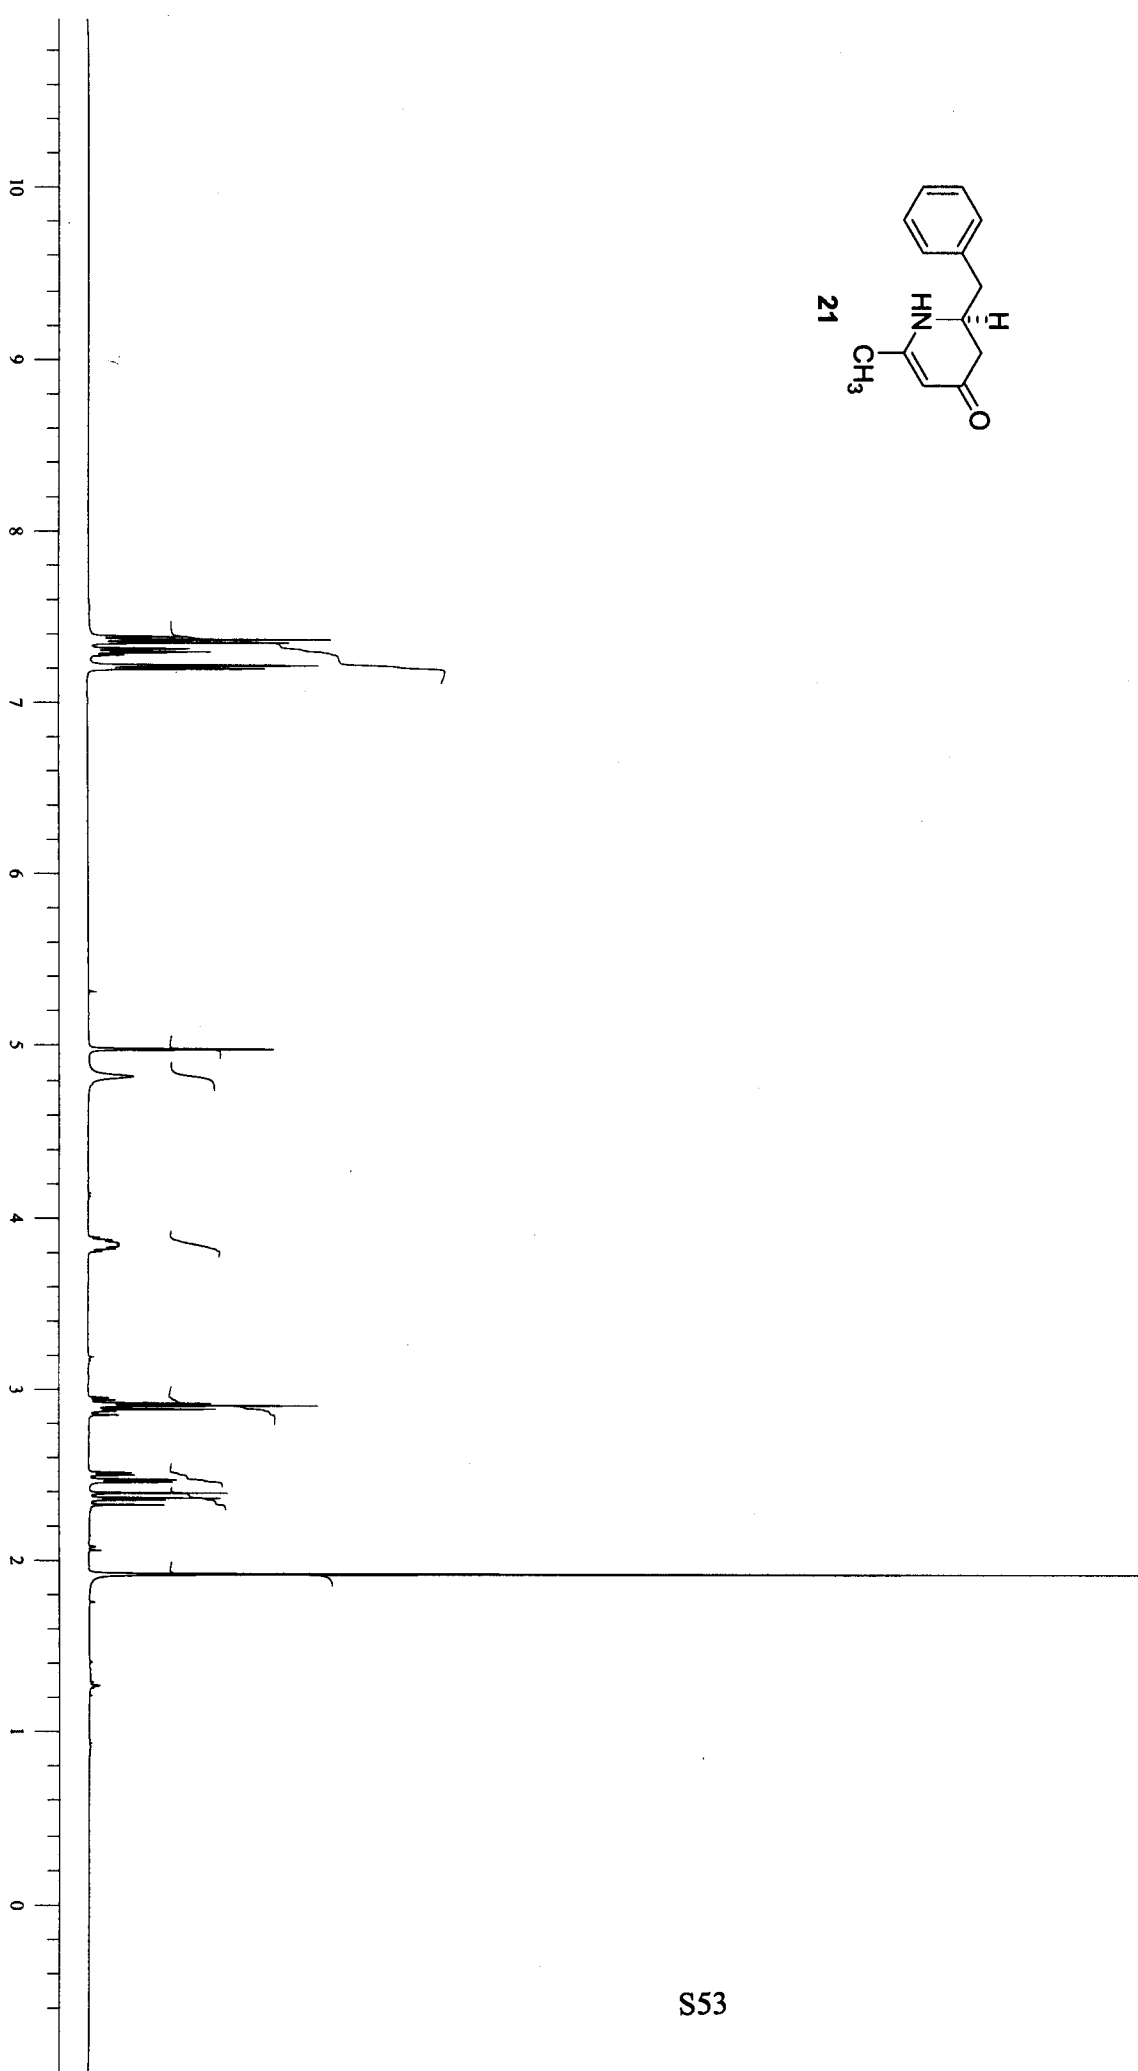

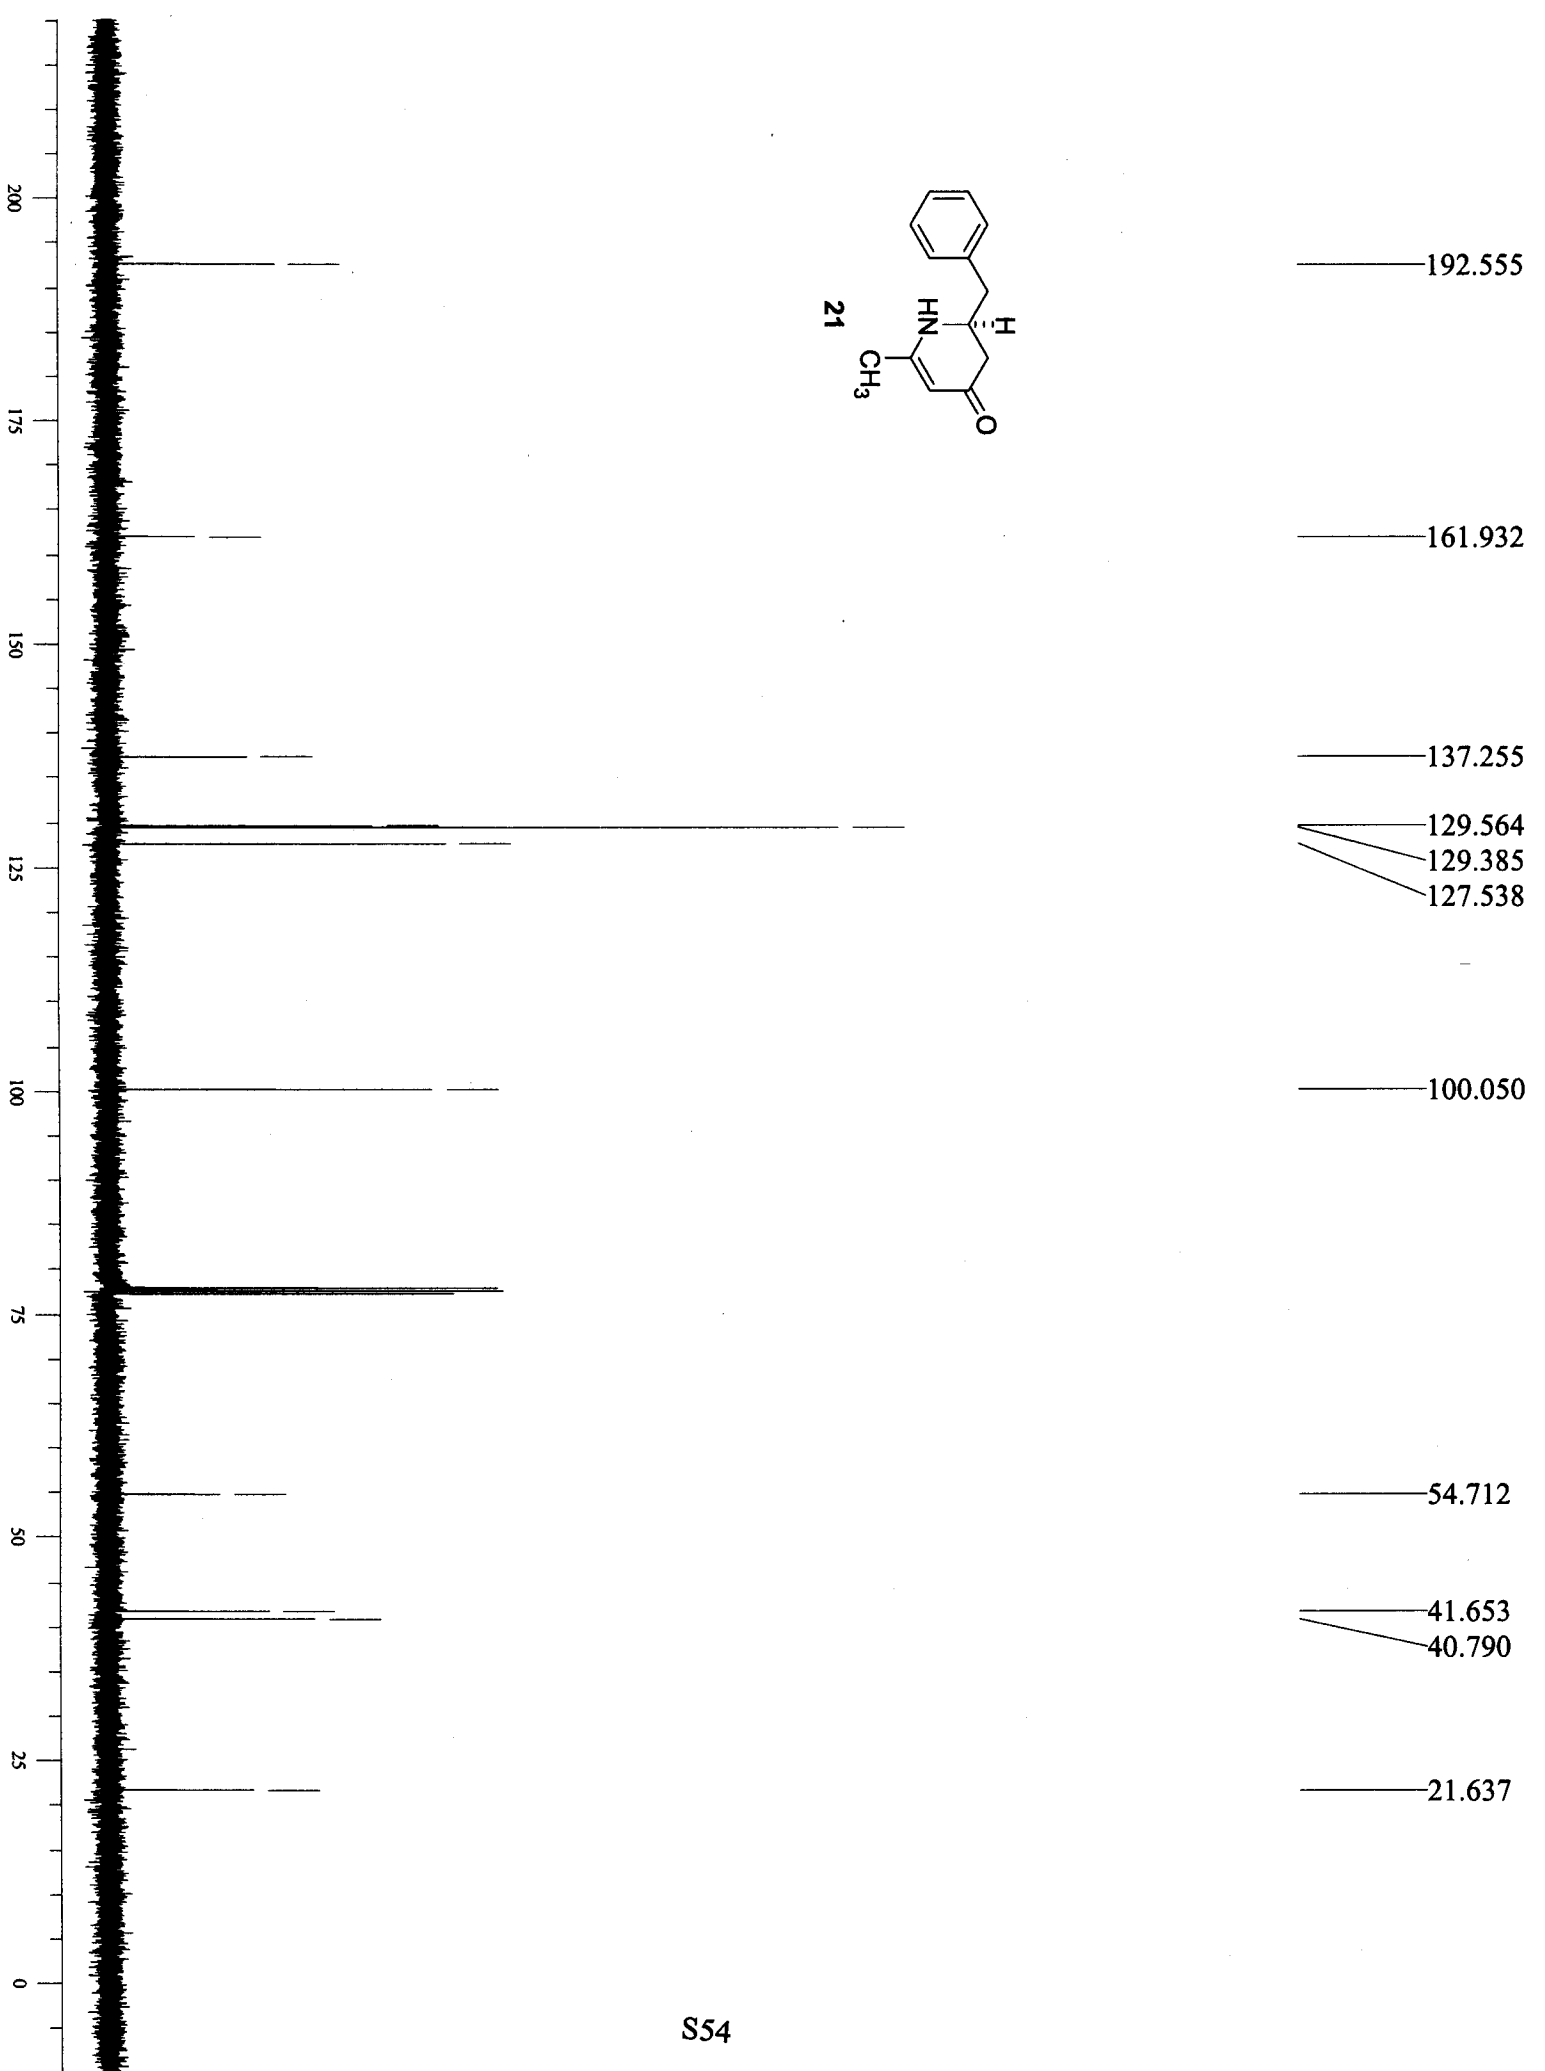

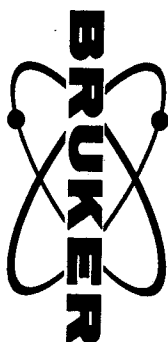

Current Data Parameters  
 NAME BJT\_5\_245C  
 EXPNO 1  
 PROCNO 1

F2 - Acquisition Parameters  
 Date\_ 20050728  
 Time 13.03  
 INSTRUM spect  
 PROBHD 5 mm CPDUL 13C  
 PULPROG zg30  
 TD 65536  
 SOLVENT CDCl3  
 NS 16  
 DS 2  
 SWH 10330.578 Hz  
 FIDRES 0.157632 Hz  
 AQ 3.1720407 sec  
 RG 64  
 DW 48.400 usec  
 DE 6.00 usec  
 TE 300.0 K  
 D1 1.00000000 sec  
 MCREST 0.00000000 sec  
 MCWRR 0.01500000 sec

==== CHANNEL f1 =====  
 NUC1 1H  
 P1 15.00 usec  
 PL1 -5.00 dB  
 SF01 500.1330885 MHz

F1 - Acquisition parameters  
 NDO 2  
 TD 256  
 SF01 500.1335 MHz  
 FIDRES 23.475060 Hz  
 SW 12.016 Ppm  
 FMODE undefined

F2 - Processing parameters  
 SI 32768  
 SF 500.1300415 MHz  
 WDW EM  
 SSB 0  
 LB 0.30 Hz  
 GB 0  
 PC 1.00

F1 - Processing parameters  
 SI 1024  
 SF 500.1300000 MHz  
 WDW QSTINE  
 SSB 0  
 LB 0.30 Hz  
 GB 0

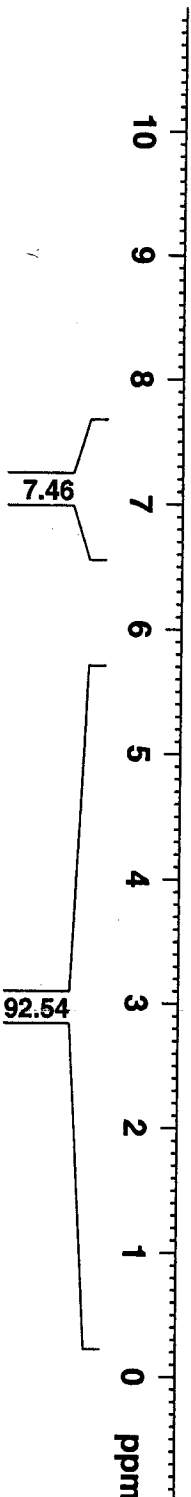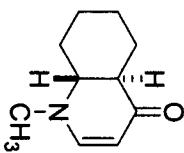

(+/-)-22

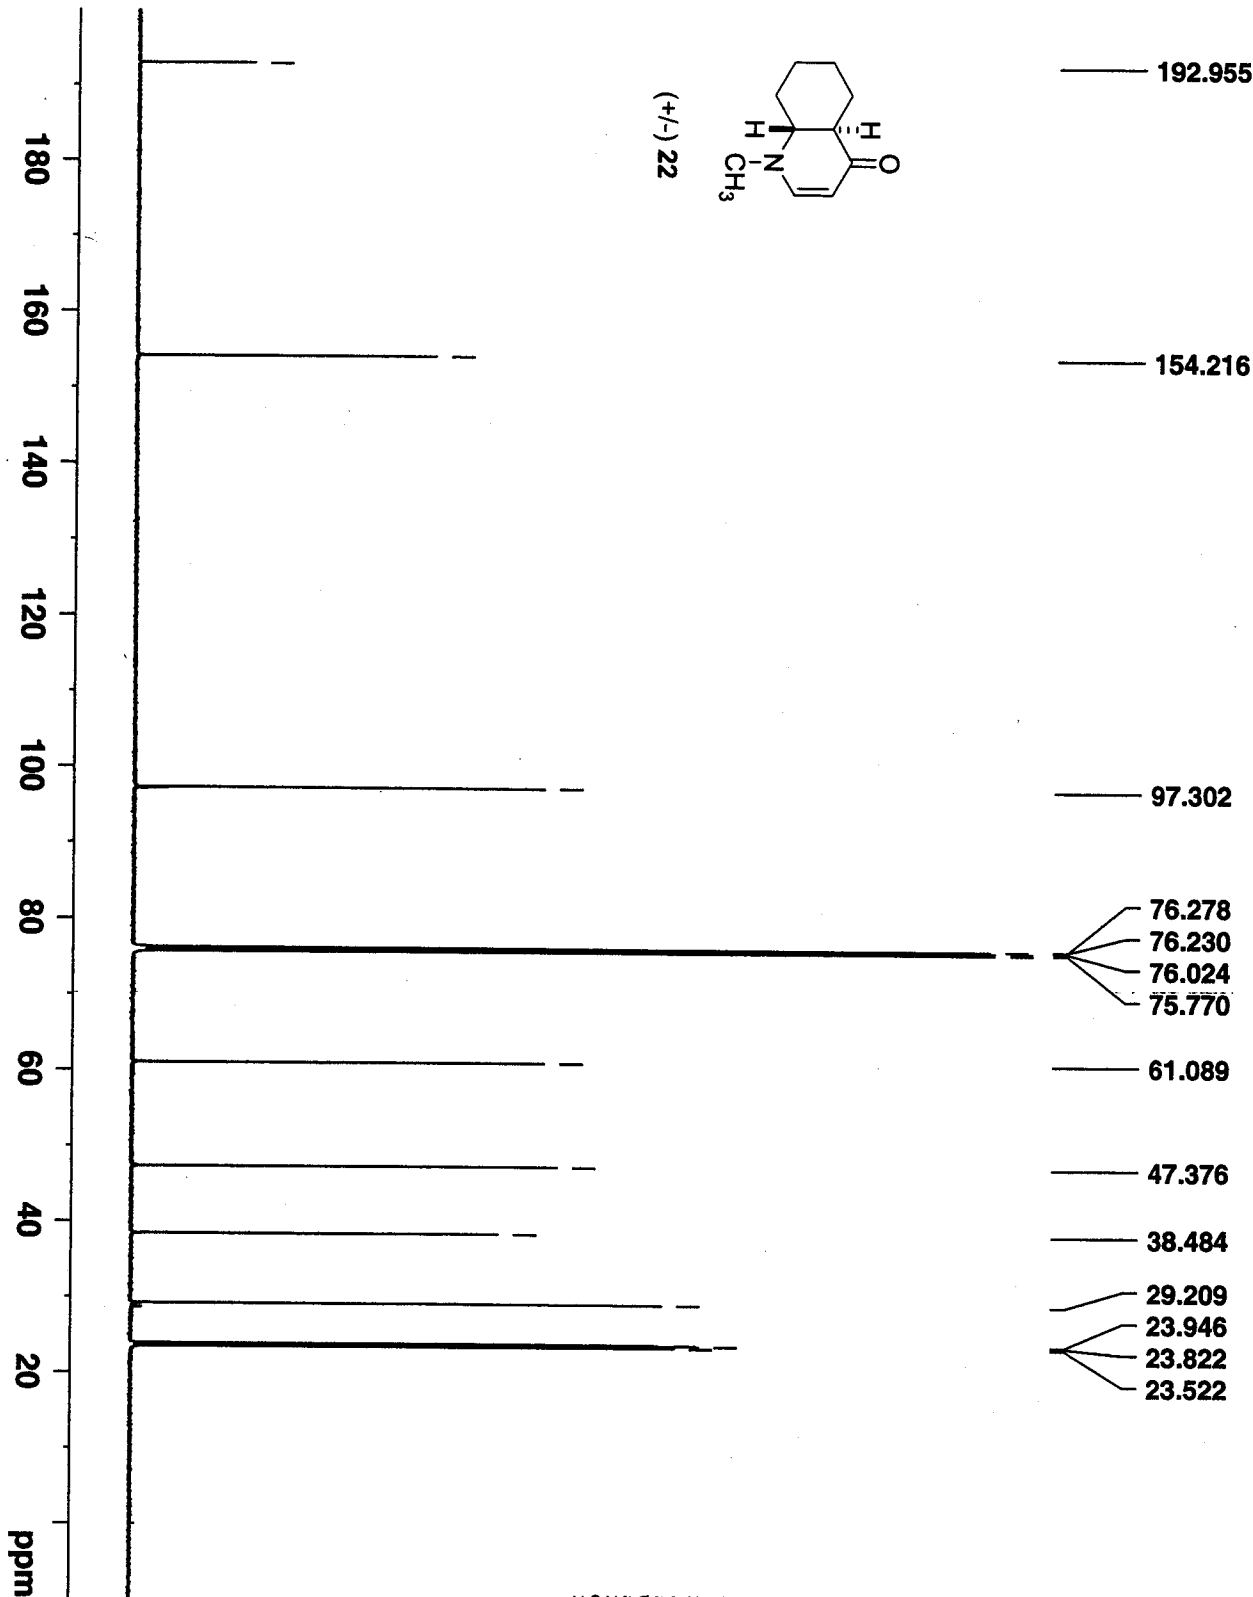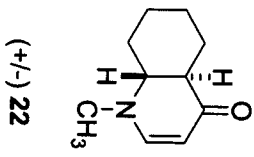

Current Data Parameters  
 NAME BJT\_5\_245C  
 EXPNO 2  
 PROCNO 1

F2 - Acquisition Parameters  
 Date\_ 20050728  
 Time 13.15

INSTRUM spect  
 PROBRD 5 mm CPDPL 13C  
 PULPROG zgpg30  
 TD 65536  
 SOLVENT CDCl3  
 NS 512  
 DS 4

SF 31446.541 Hz  
 FIDRES 0.479836 Hz  
 AQ 1.0420883 sec  
 RG 8132  
 DM 15.900 usec  
 DE 6.00 usec  
 TE 300.0 K  
 D1 0.15000001 sec  
 d11 0.03000000 sec  
 DELTA 0.05000000 sec  
 MCREST 0.00000000 sec  
 MCWRR 0.01500000 sec

\*\*\*\*\* CHANNEL F1 \*\*\*\*\*  
 NUCL 13C  
 P1 10.00 usec  
 PL1 -4.90 dB  
 SFO1 125.7697360 MHz

\*\*\*\*\* CHANNEL F2 \*\*\*\*\*  
 CPDPRG2 waltz16  
 NUCL2 1H  
 PCPD2 80.00 usec  
 PL2 -5.00 dB  
 PL12 9.54 dB  
 PL13 10.00 dB  
 SFO2 500.1325000 MHz

F2 - Processing parameters  
 SI 65536  
 SF 125.7579179 MHz  
 NWDW EM  
 SSB 0  
 LB 1.00 Hz  
 GB 0  
 PC 1.40



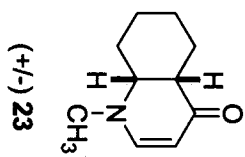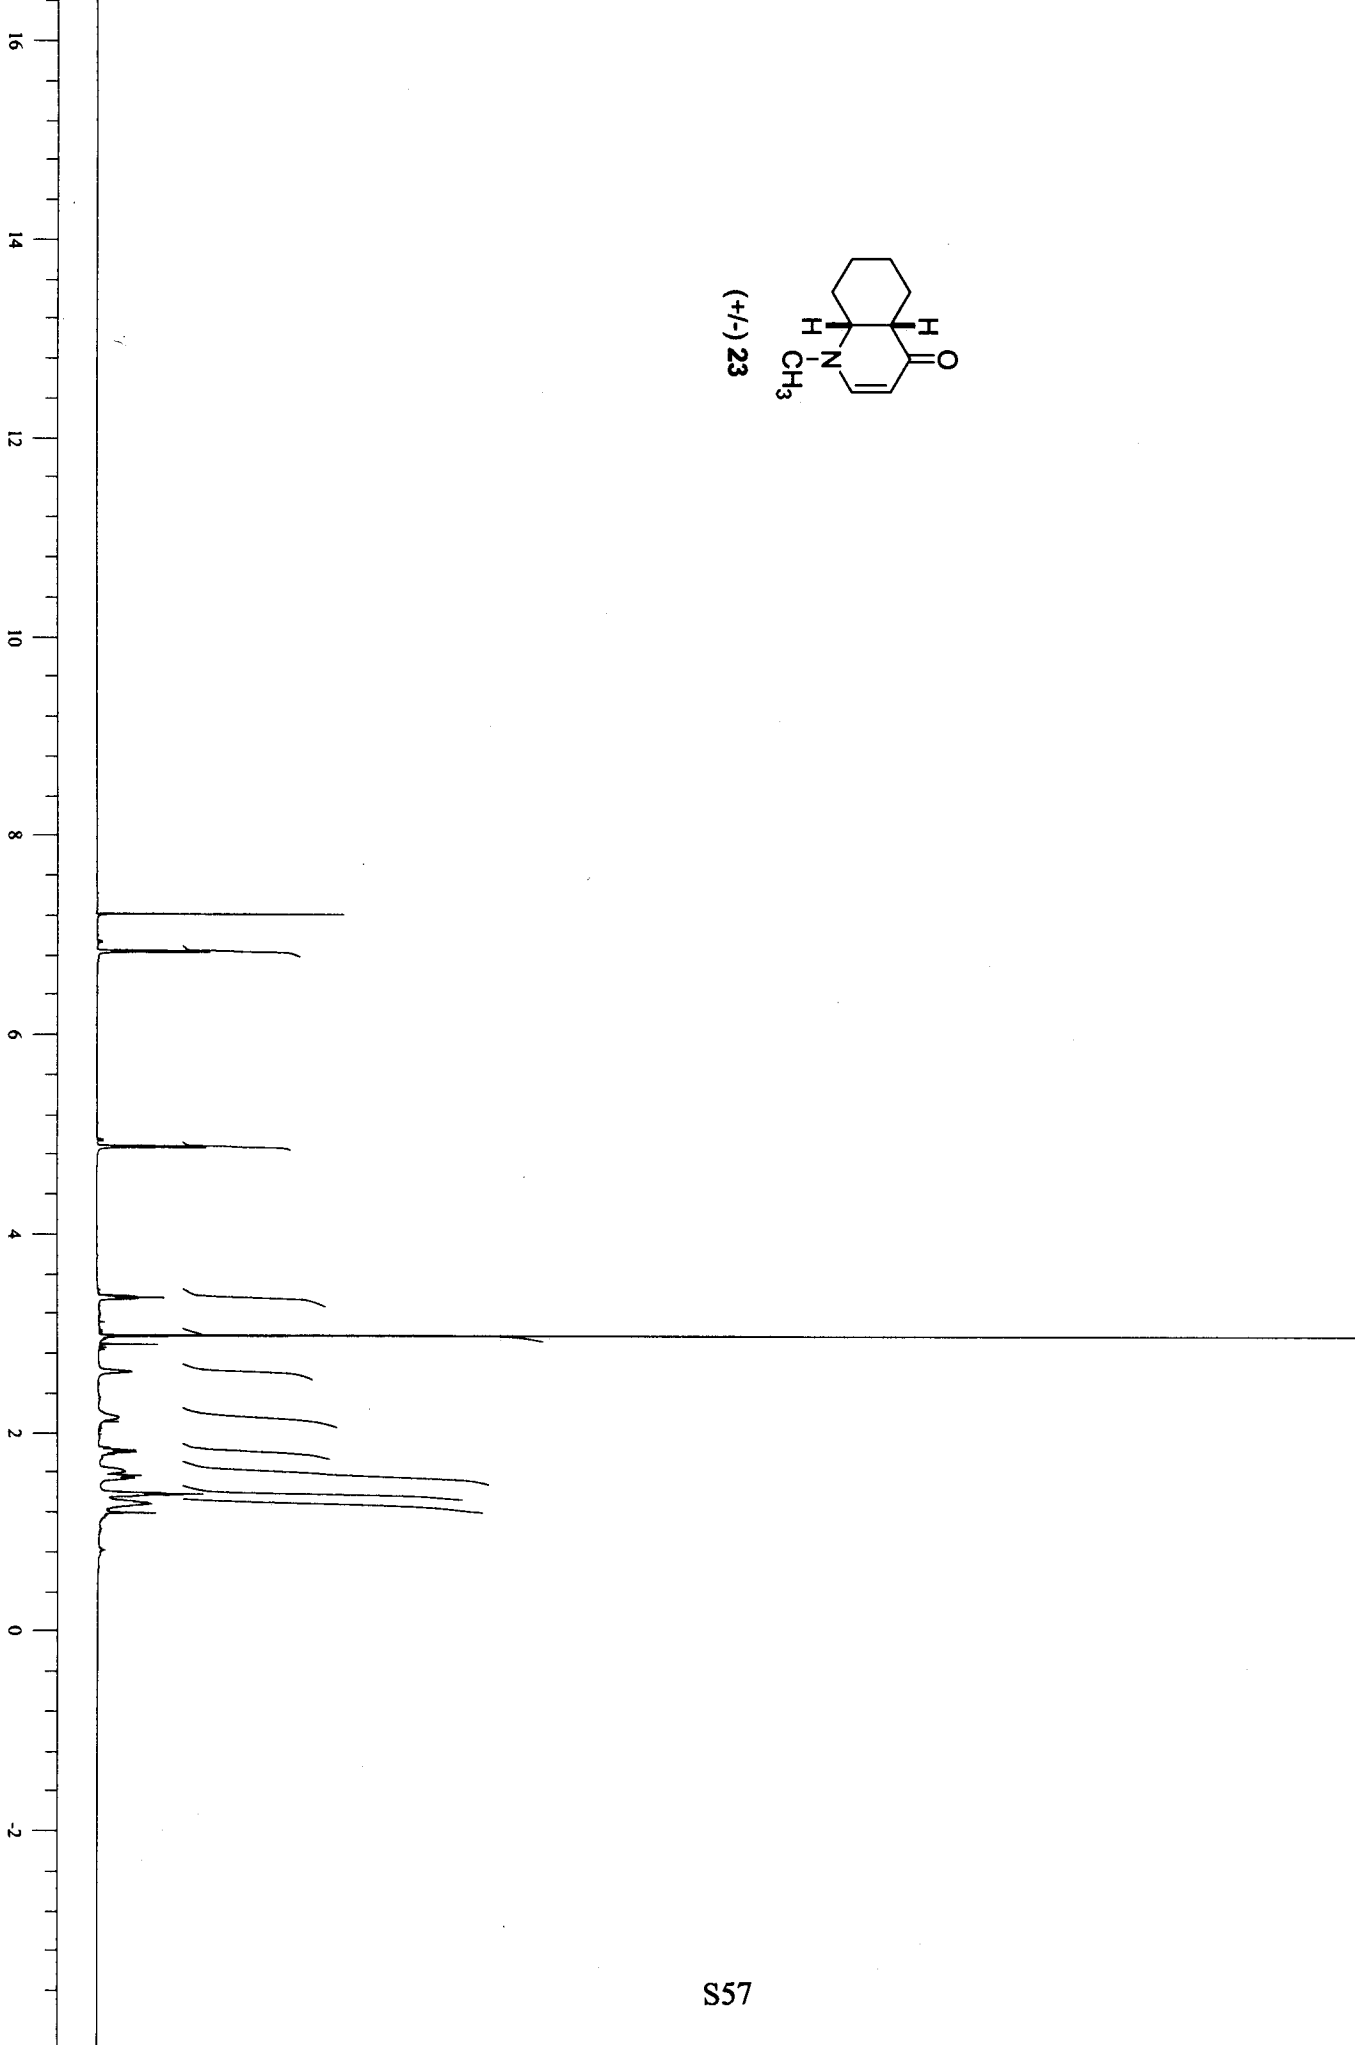

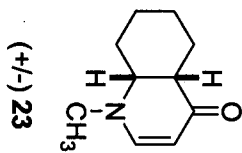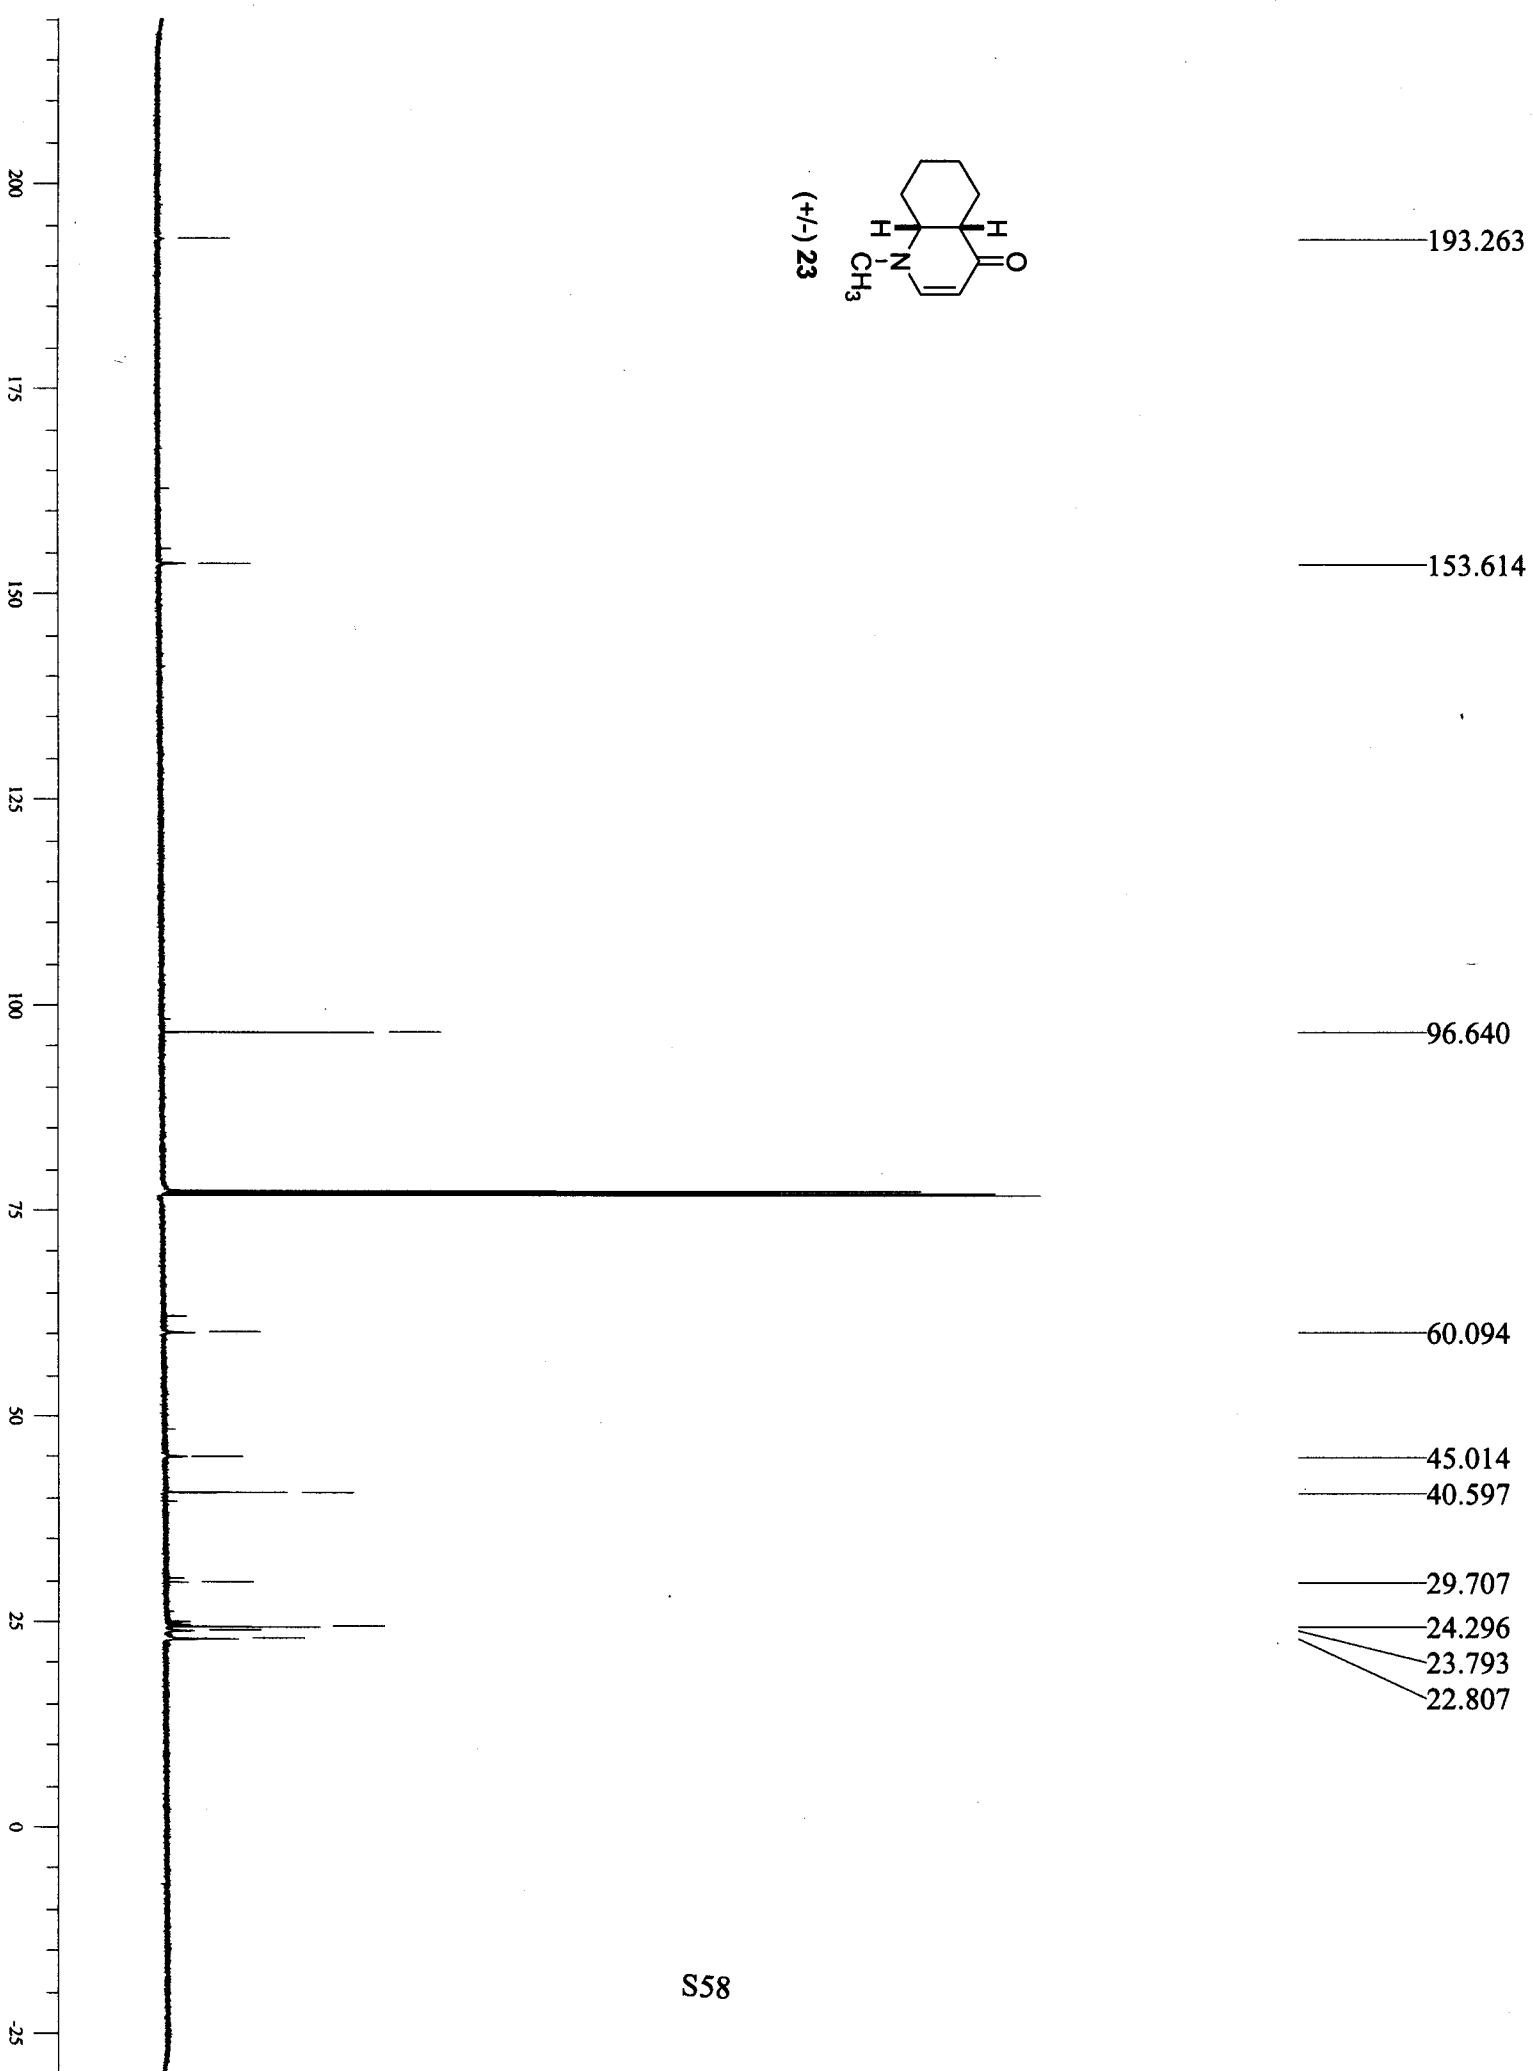

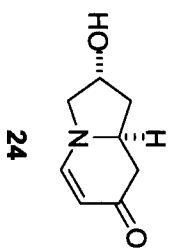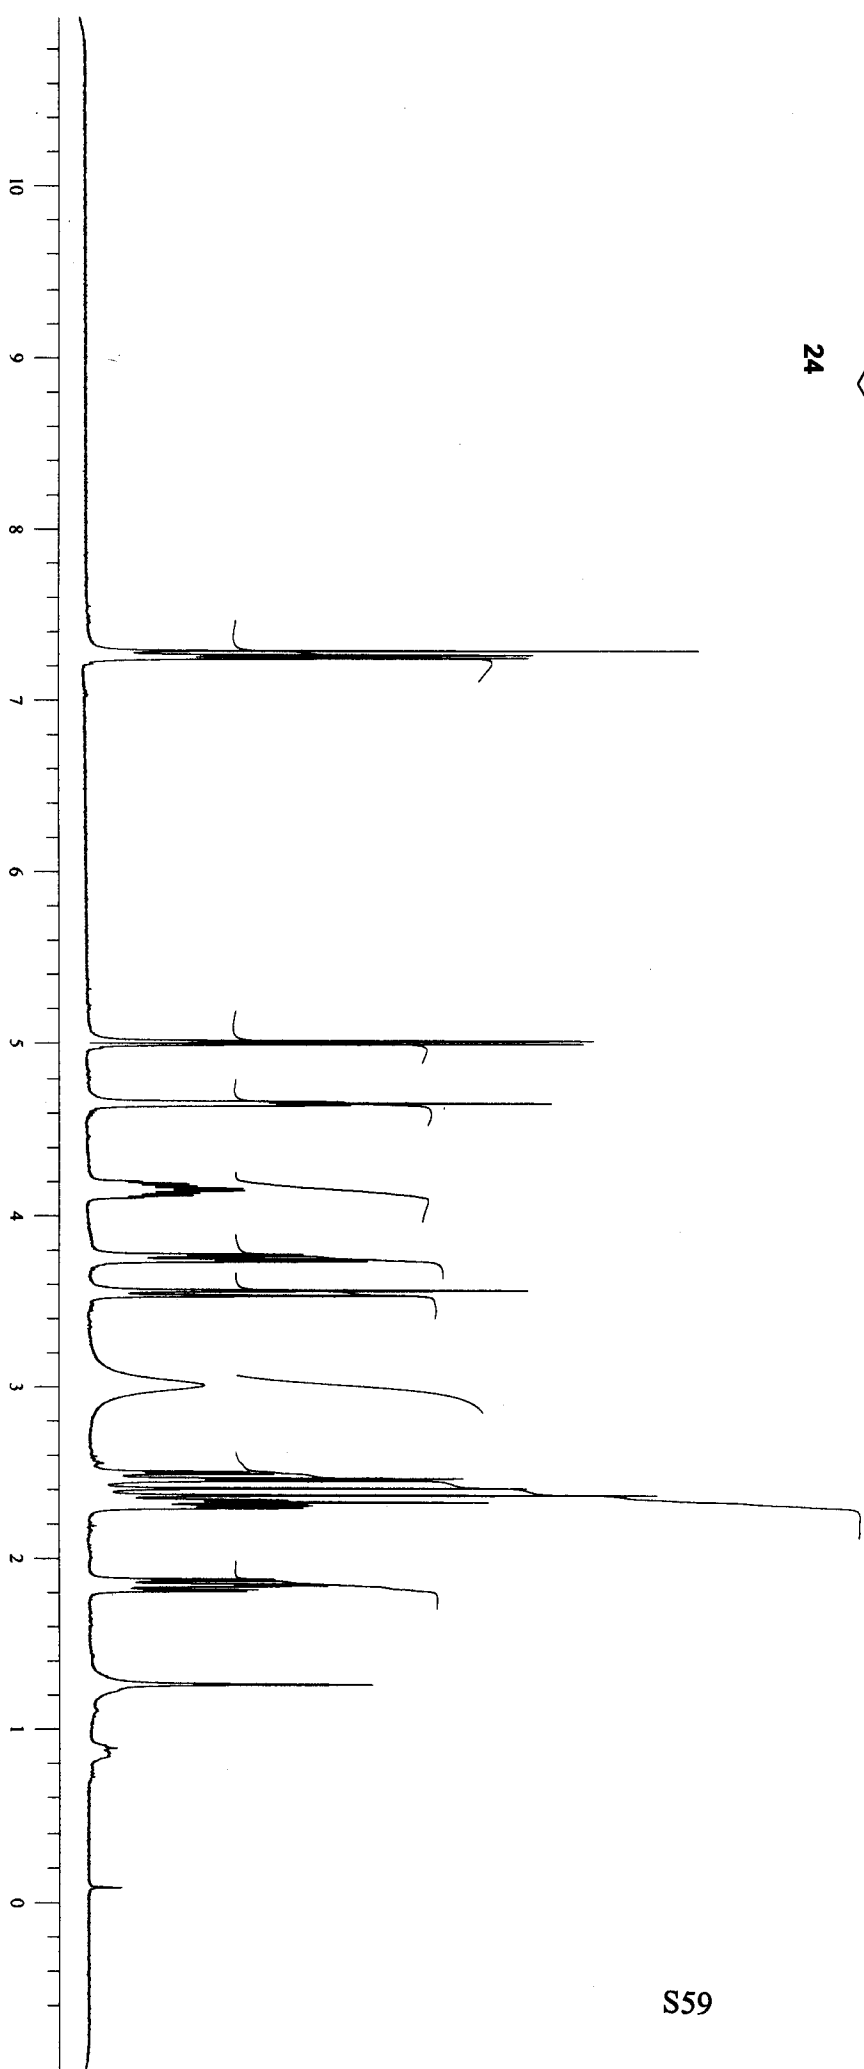

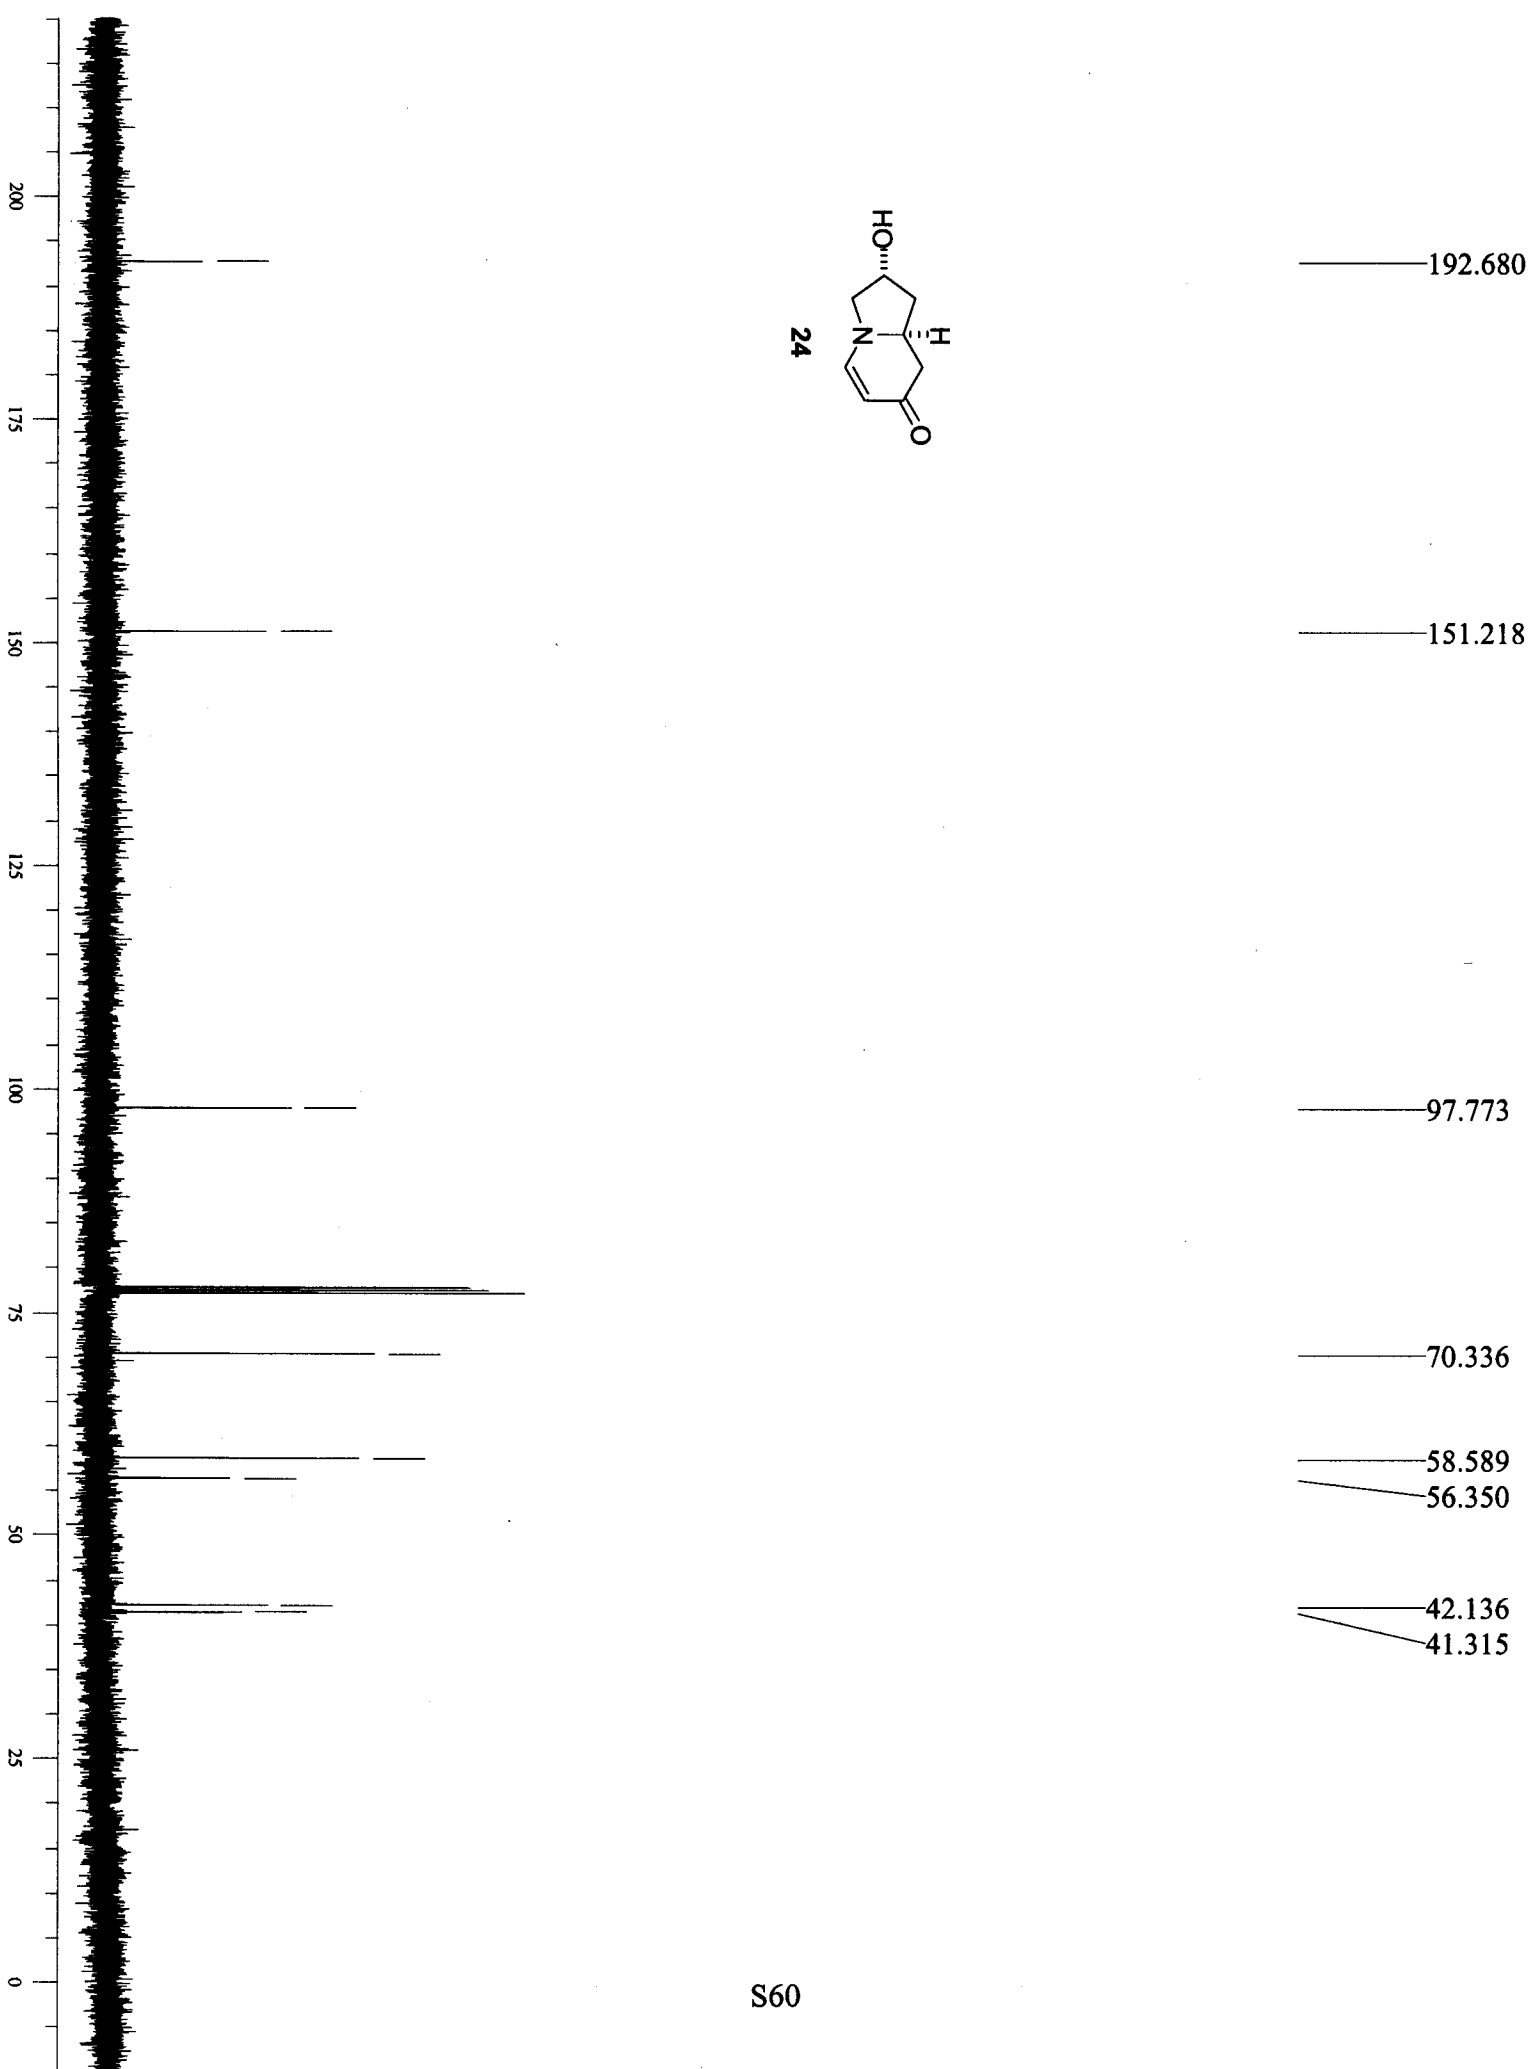

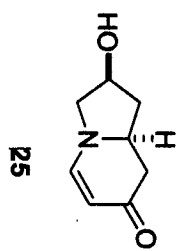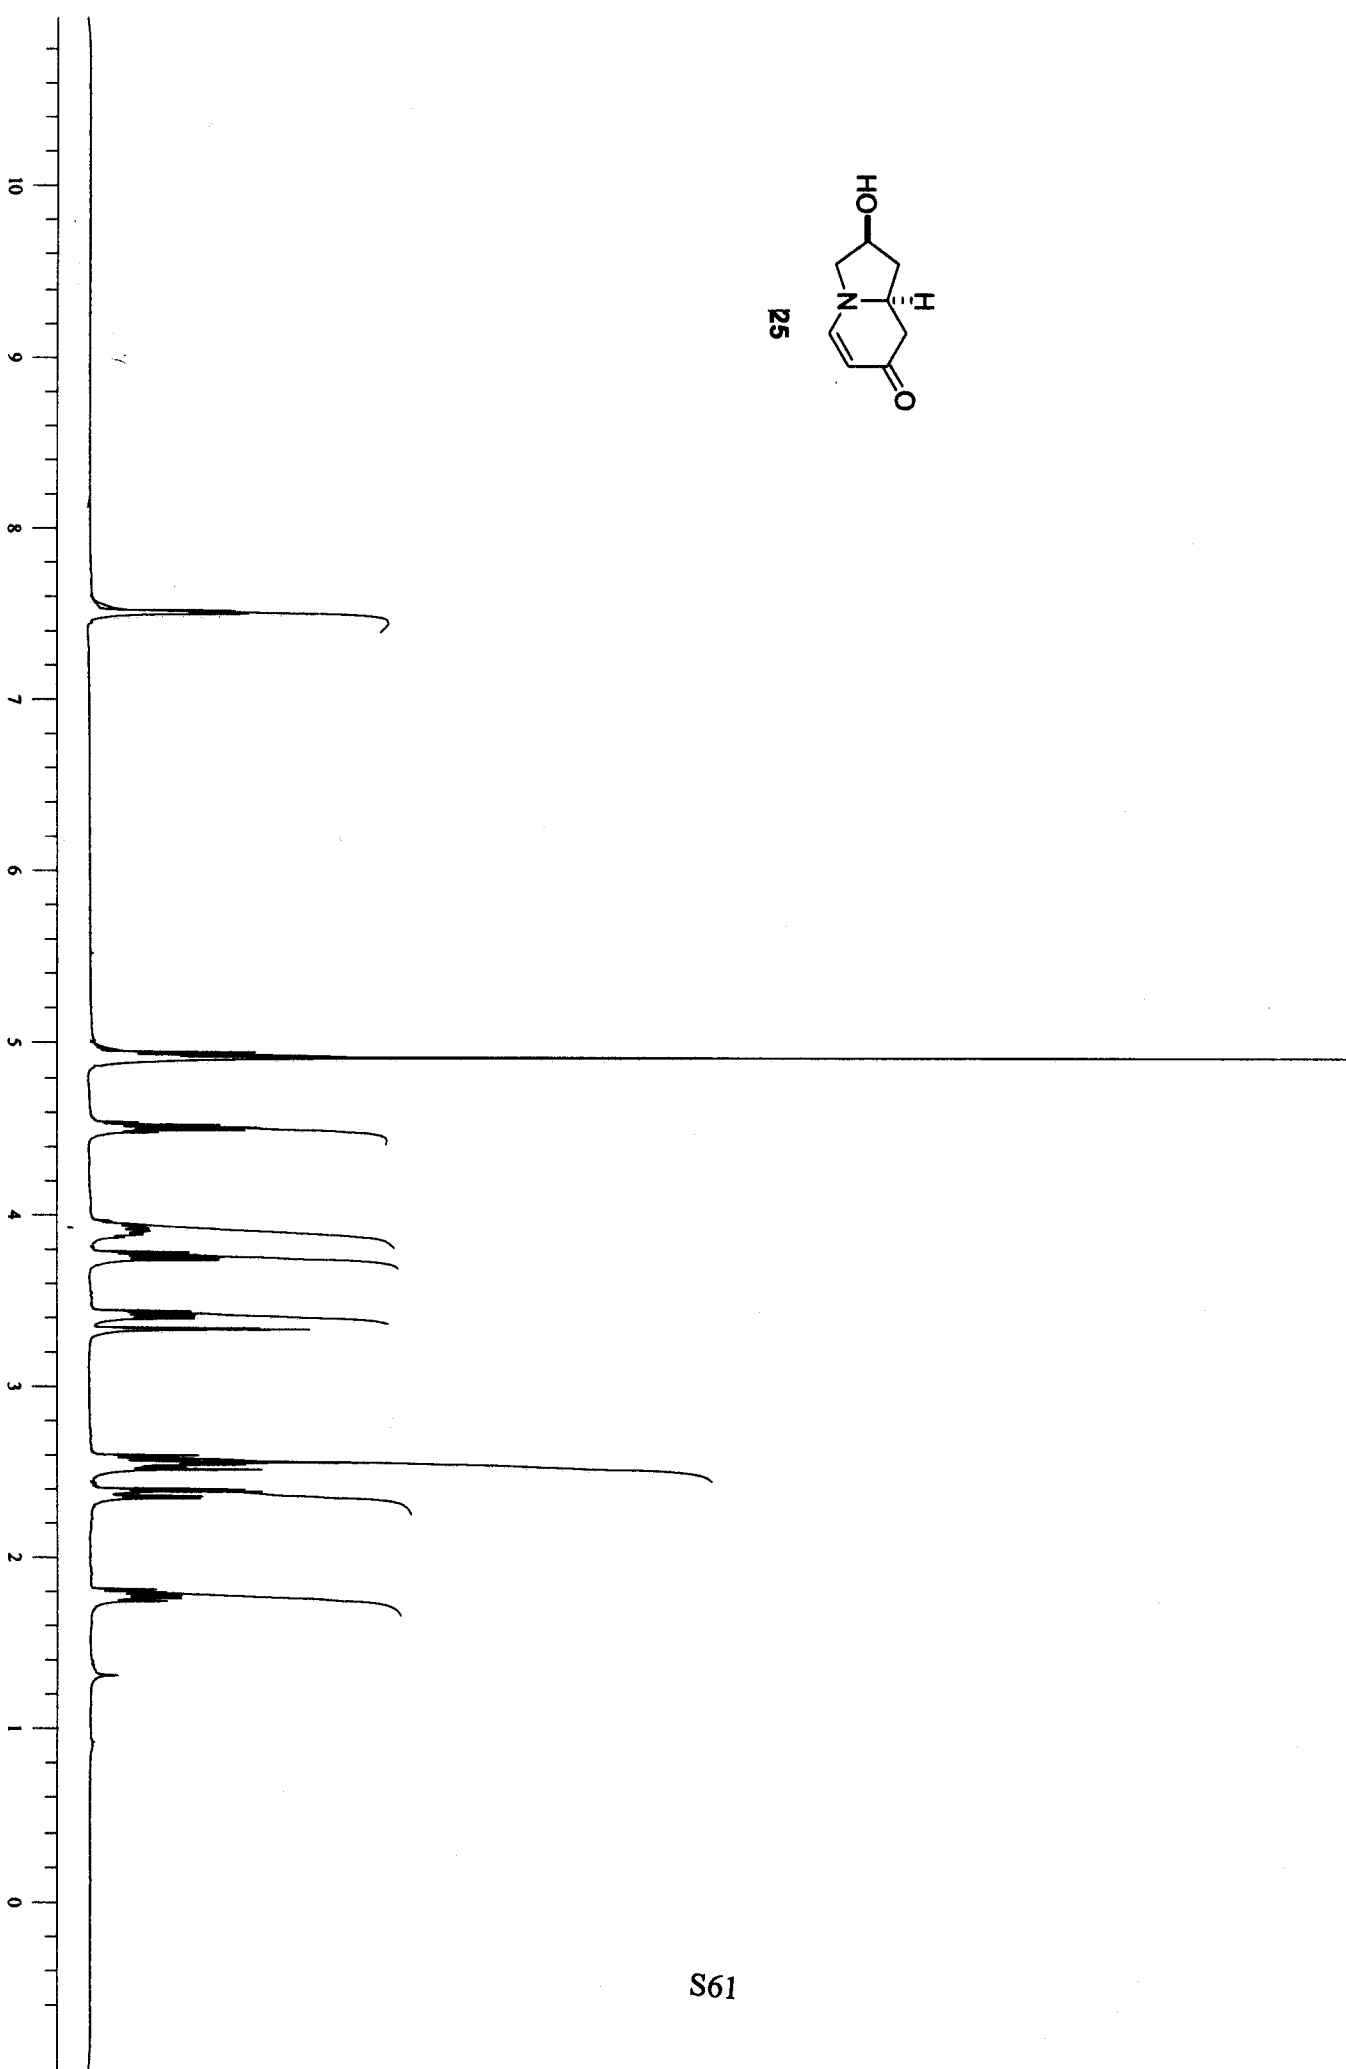

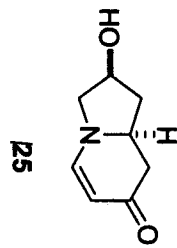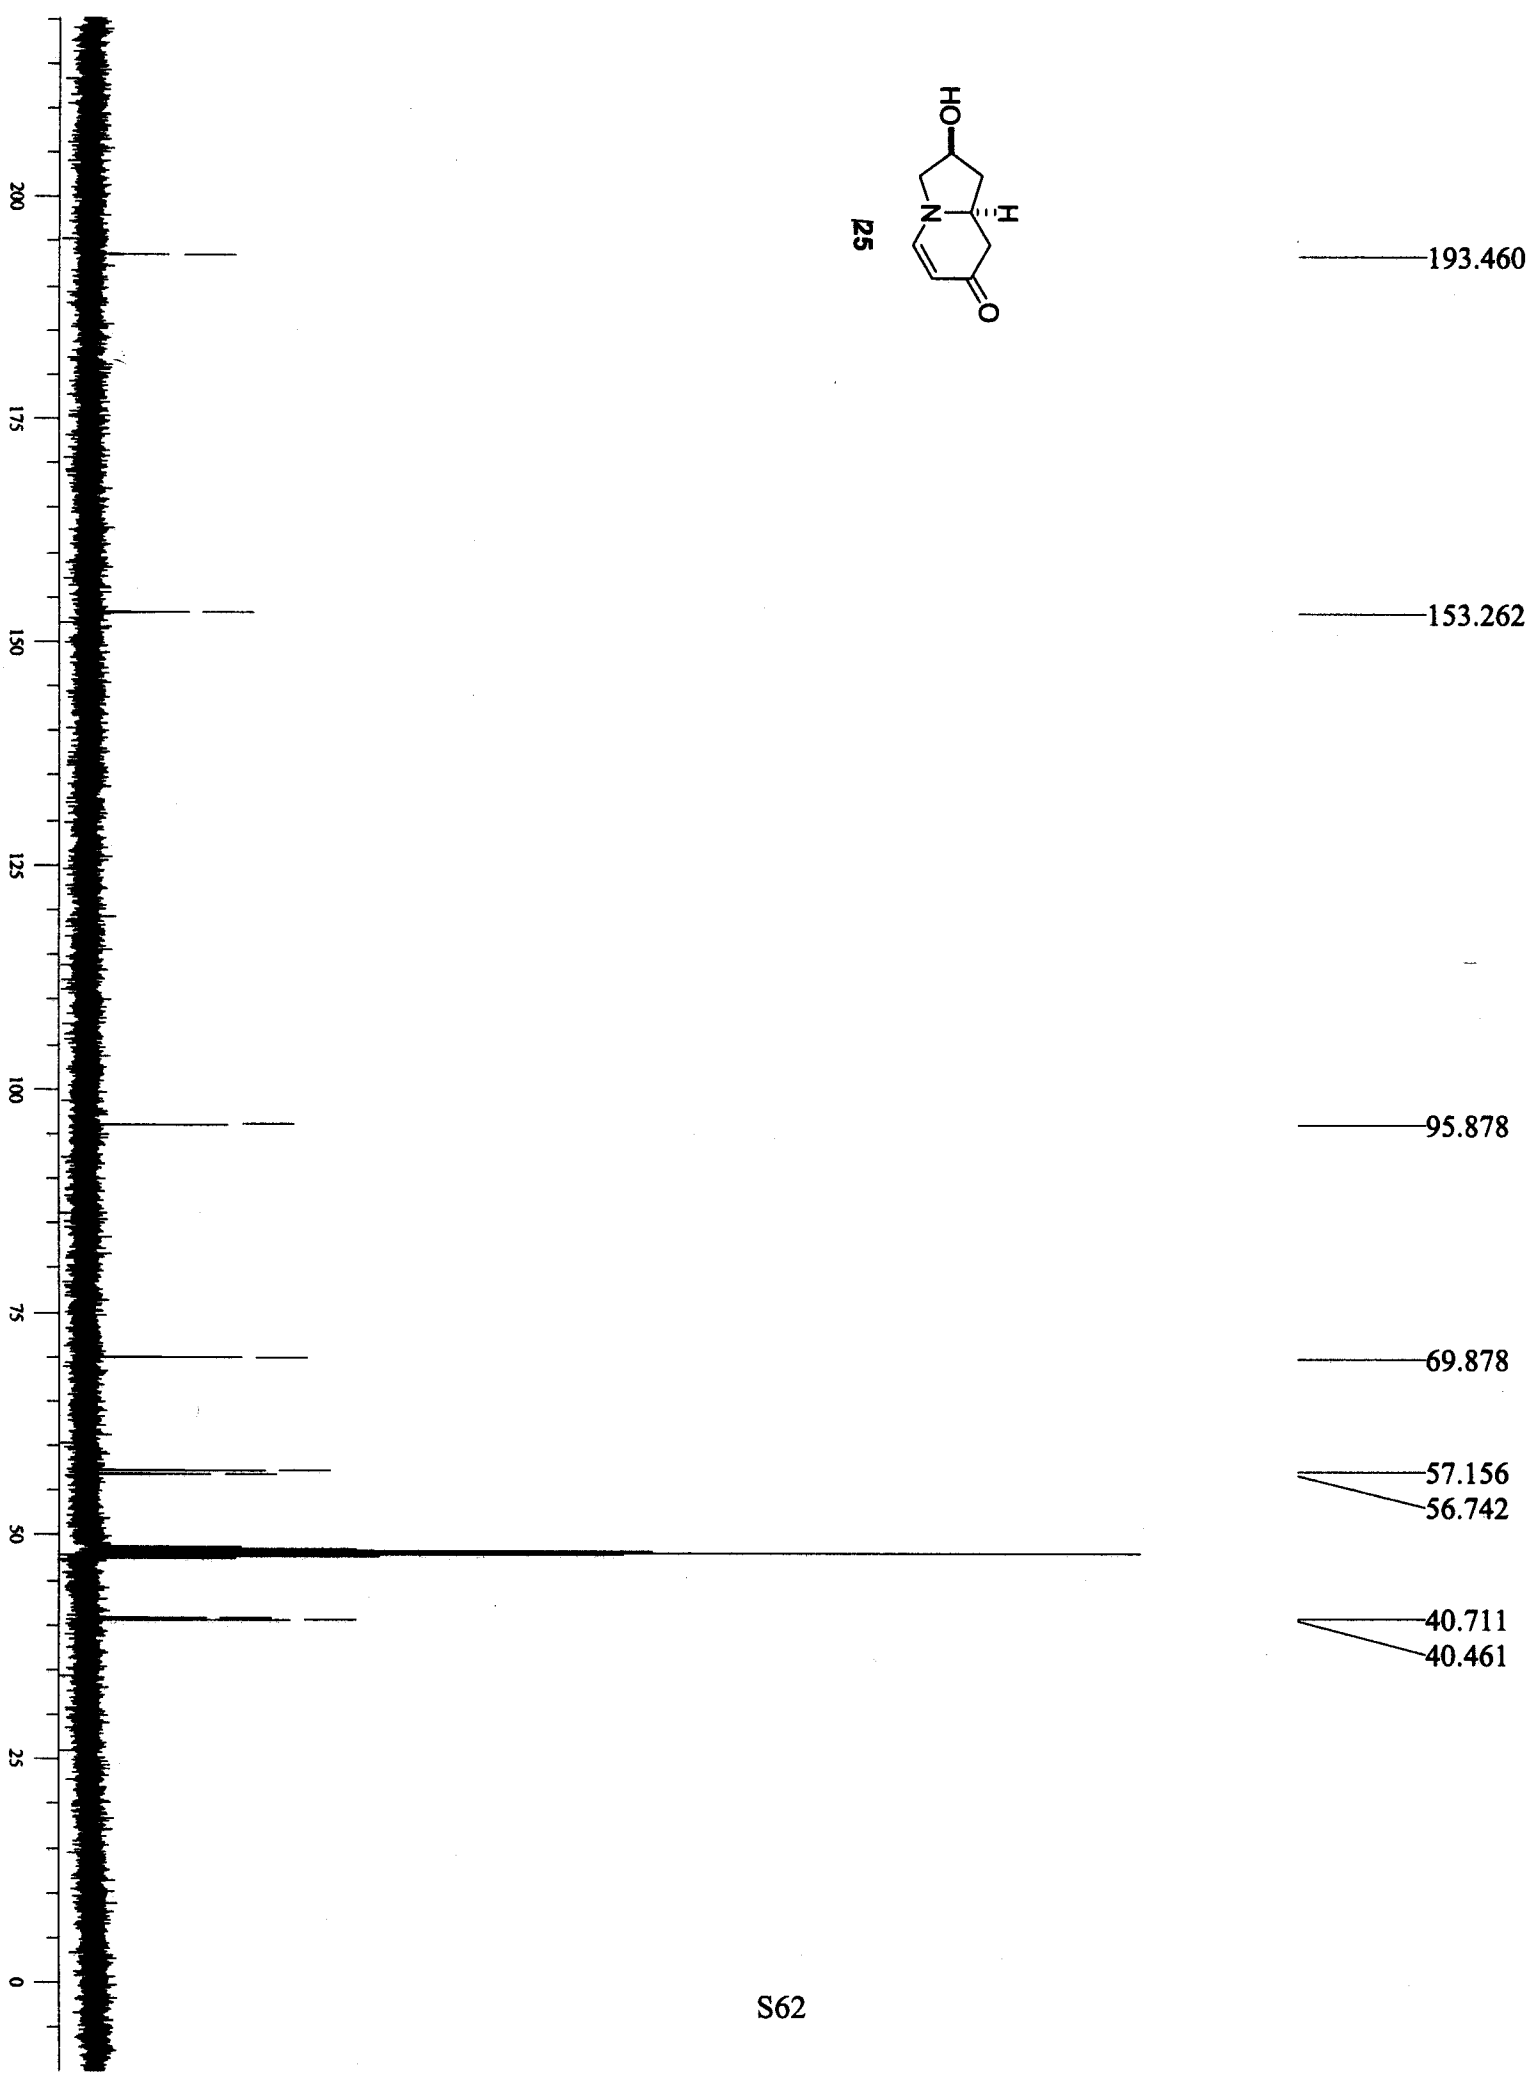

ppm 10 8 6 4 2 0

Integral

1.8984

1.0130

2.1467

0.9896

1.0529

2.0509

6.6094

26

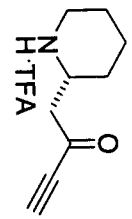

ppm

9.5228  
9.5125  
9.4143  
9.3151  
9.2241  
9.1411  
8.8182  
8.8036  
8.7447  
7.5407  
7.3306  
7.2963  
7.2814  
7.0173  
6.7697  
6.7497  
6.4629  
6.4415  
4.4656  
4.3395  
4.1993  
4.1693  
3.5456  
3.5001  
3.4681  
3.3781  
3.2816  
3.2377  
3.0309  
3.0146  
2.9849  
2.9699  
1.9840  
1.9537  
1.9211  
1.8666  
1.8059  
1.7709  
1.7460  
1.7149  
1.6850  
1.6574  
1.5762  
1.5505  
1.4485  
1.2714  
0.8957  
-0.9042

Current Data Parameters

NAME BJT5-215  
EXRNO 3  
PRCNO 1

F2 - Acquisition Parameters

Date\_ 20050711  
Time 13.36  
INSTRUM dxr400  
PROBHD 5 mm QNP 1H/13  
PULPROG zg30  
TD 32768  
SOLVENT CDCl3  
NS 16  
DS 2  
SMH 4789.272 Hz  
FIDRES 0.146157 Hz  
AQ 3.4210291 sec  
RG 456.1  
DM 104.400 usec  
DE 5.50 usec  
TE 295.2 K  
D1 1.00000000 sec  
ICREST 0.00000000 sec  
MCNRC 0.01500000 sec

==== CHANNEL f1 =====

NUC1 1H  
P1 9.35 usec  
PL1 -4.00 dB  
SFO1 400.1320007 MHz

F2 - Processing parameters

SI 32768  
SF 400.1300000 MHz  
WDW EM  
SSB 0  
LB 0.30 Hz  
GB 0  
PC 1.00

1D NMR plot parameters

CX 20.00 cm  
CY 12.50 cm  
FLP 11.000 ppm  
F1 4401.43 Hz  
F2P -1.000 ppm  
F2 -400.13 Hz  
PPMCM 0.60000 ppm/cm  
HZCM 240.07800 Hz/cm

ppm

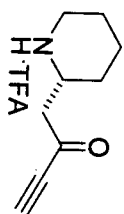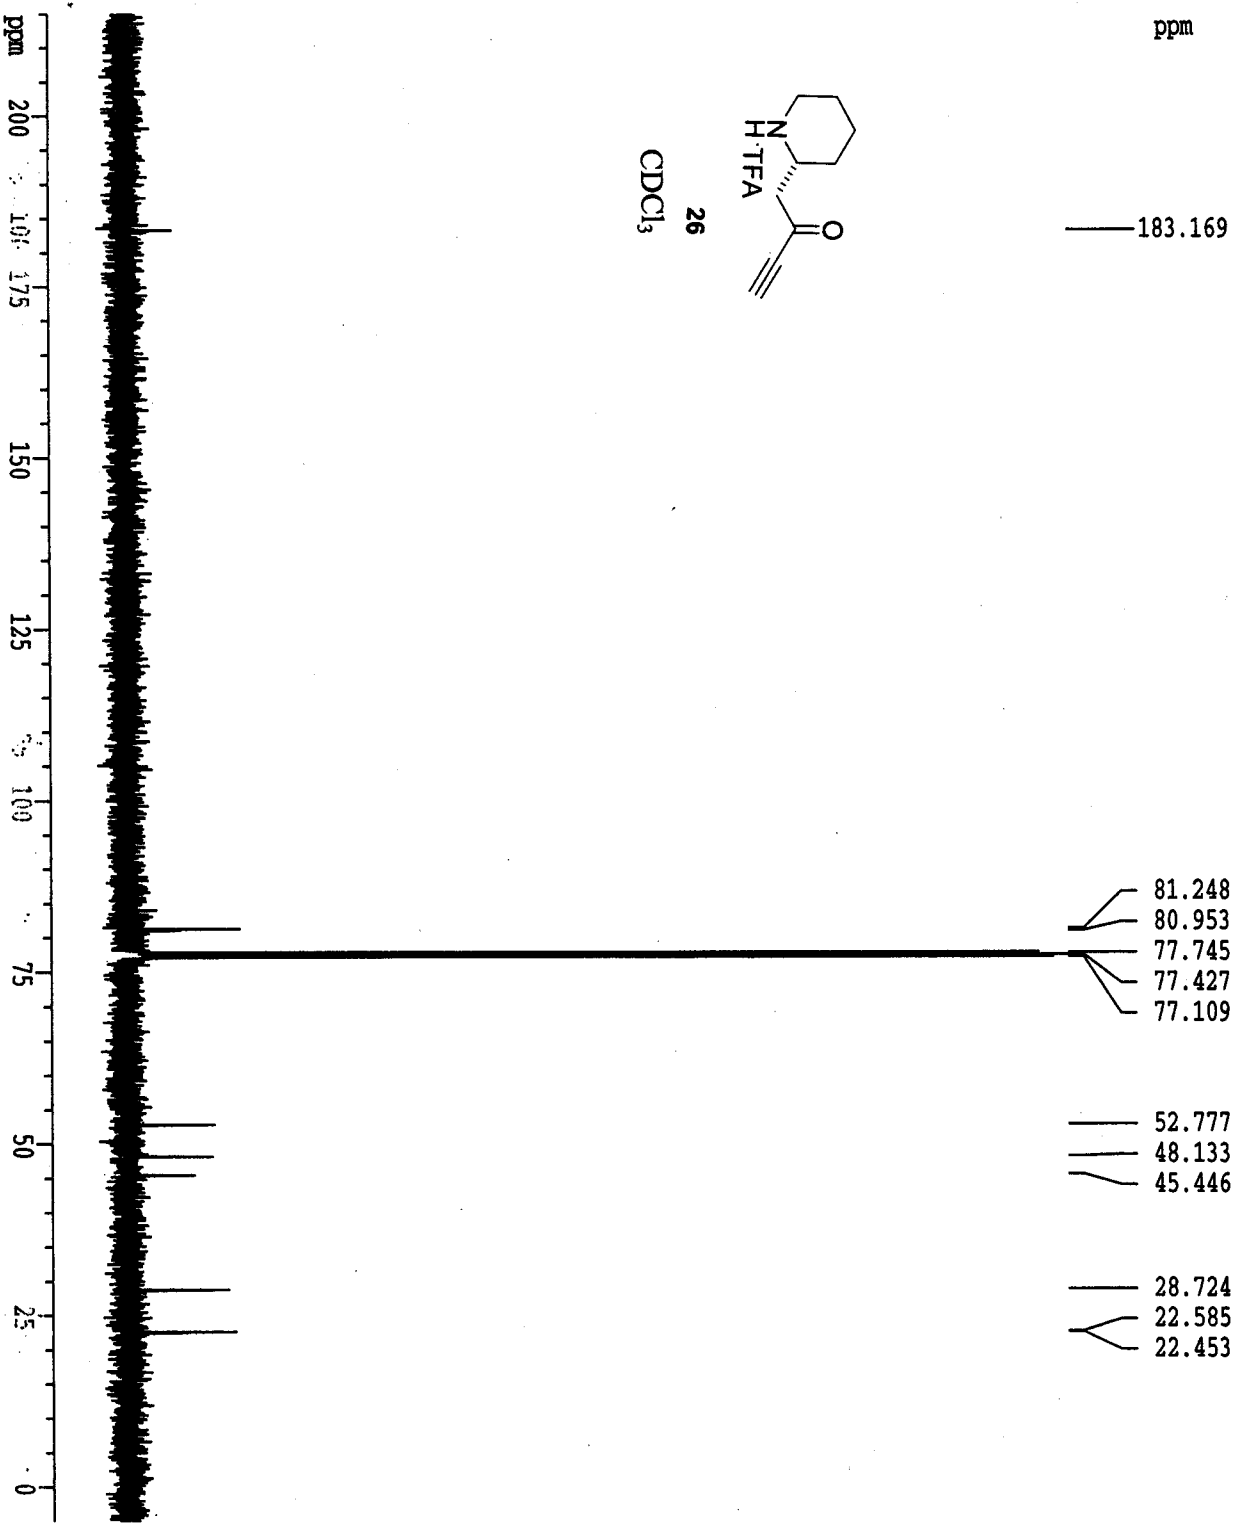

183.169

81.248  
80.953  
77.745  
77.427  
77.109

52.777  
48.133  
45.446

28.724  
22.585  
22.453

Current Data Parameters  
 NAME BY5-215  
 EXTNO 4  
 PROCNO 1

F2 - Acquisition Parameters

Date\_ 20050711  
 Time 13.39  
 INSTRUM dx400  
 PROBRD 5 mm QNP 1H/13  
 PULPROG zgpg30  
 TD 65536  
 SOLVENT CDCl3  
 NS 400  
 DS 4  
 SMH 23148.148 Hz  
 FIDRES 0.353213 Hz  
 AQ 1.4156276 sec  
 RG 32768  
 IWX 21.600 usec  
 DR 5.50 usec  
 TR 296.2 K  
 DE 0.15000001 sec  
 DL 0.03000000 sec  
 d11 0.05000000 sec  
 DELTA 0.00000000 sec  
 ACQRES 0.01500000 sec

CHANNEL F1

MV1 13C  
 P1 11.25 usec  
 PL1 2.00 dB  
 SFO1 100.6232933 MHz

CHANNEL F2

CPDPRG2 waltz16  
 MV2 1H  
 PCPD2 100.00 usec  
 PL2 -4.00 dB  
 PL12 16.58 dB  
 PL13 17.00 dB  
 SFO2 400.1316005 MHz

F2 - Processing parameters

SI 65536  
 SF 100.6127290 MHz  
 MDW EM  
 SSB 0  
 LB 1.00 Hz  
 GB 0  
 PC 1.40

1D NMR plot parameters

CX 20.00 cm  
 CY 12.50 cm  
 F1P 215.000 ppm  
 F1 21631.74 Hz  
 F2P -5.000 ppm  
 F2 -503.06 Hz  
 PRGCM 11.00000 ppm/cm  
 HZCM 1106.73999 Hz/cm



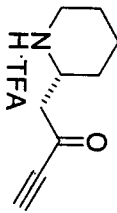

CD<sub>3</sub>OD

ppm

183.323

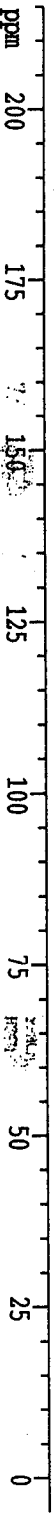

- 82.247
- 80.854
- 52.386
- 48.625
- 48.412
- 48.199
- 47.986
- 47.816
- 47.774
- 47.561
- 47.348
- 45.103
- 28.472
- 22.298
- 21.899

Current Data Parameters  
NAME BJMS-215  
EXPTNO 2  
PROCNO 1

F2 - Acquisition Parameters  
Date\_ 20050529  
Time 15.09

INSTRUM drc400  
PROBHD 5 mm QNP 1H/13  
PULPROG zgpg30  
TD 65536  
SOLVENT CDCl3  
NS 602

DS 4  
SMH 23148.148 Hz  
PTDRES 0.353213 Hz  
AQ 1.4156276 sec  
RG 32768  
DM 21.600 usec  
DE 5.50 usec  
TE 294.2 K

DI 0.1500001 sec  
dI1 0.03000000 sec  
DELTA 0.05000000 sec  
ACRESST 0.00000000 sec  
MCNMR 0.01500000 sec

==== CHANNEL F1 =====  
NUC1 13C  
P1 11.25 usec  
PL1 2.00 dB  
SFO1 100.6232933 MHz

==== CHANNEL F2 =====  
CPDPRG2 waltz16  
NUC2 1H  
PCPD2 100.00 usec  
PL2 -4.00 dB  
PL12 16.58 dB  
PL13 17.00 dB  
SFO2 400.1316005 MHz

F2 - Processing parameters  
SI 65536  
SF 100.6127290 MHz  
WDW EM  
SSB 0  
LB 1.00 Hz  
GB 0  
PC 1.40

ID NMR plot parameters  
CX 20.00 cm  
CY 12.50 cm  
E1P 215.000 ppm  
F1 21631.74 Hz  
F2P -5.000 ppm  
F2 -503.06 Hz  
PCKM 11.00000 ppm/cm  
HZCM 1106.73999 Hz/cm

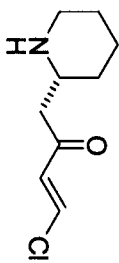

29

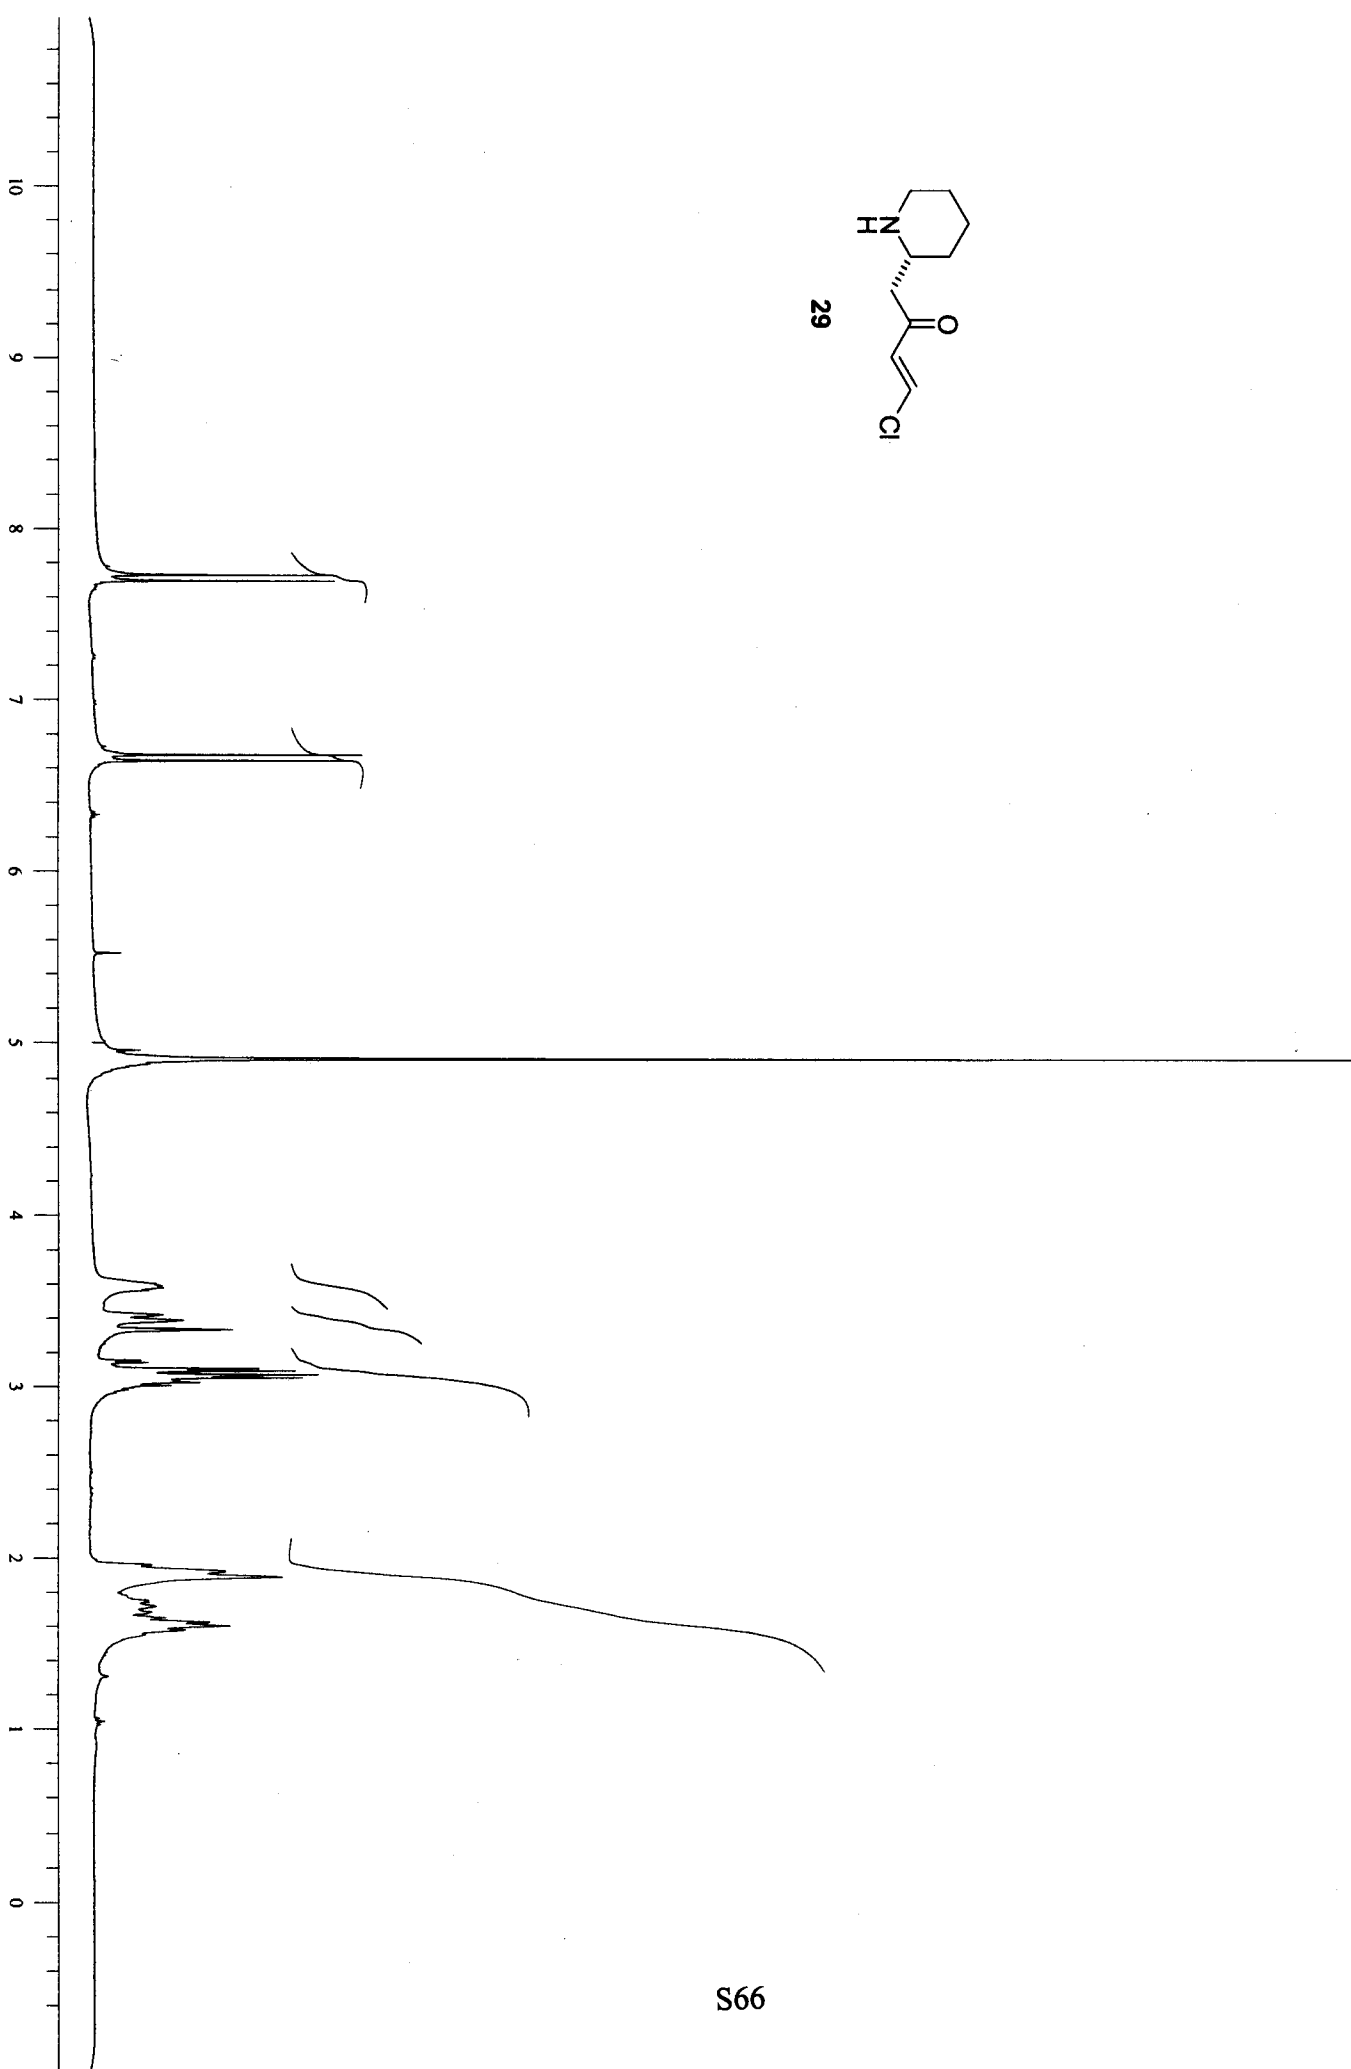

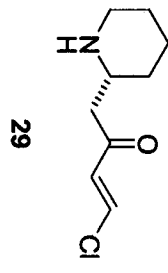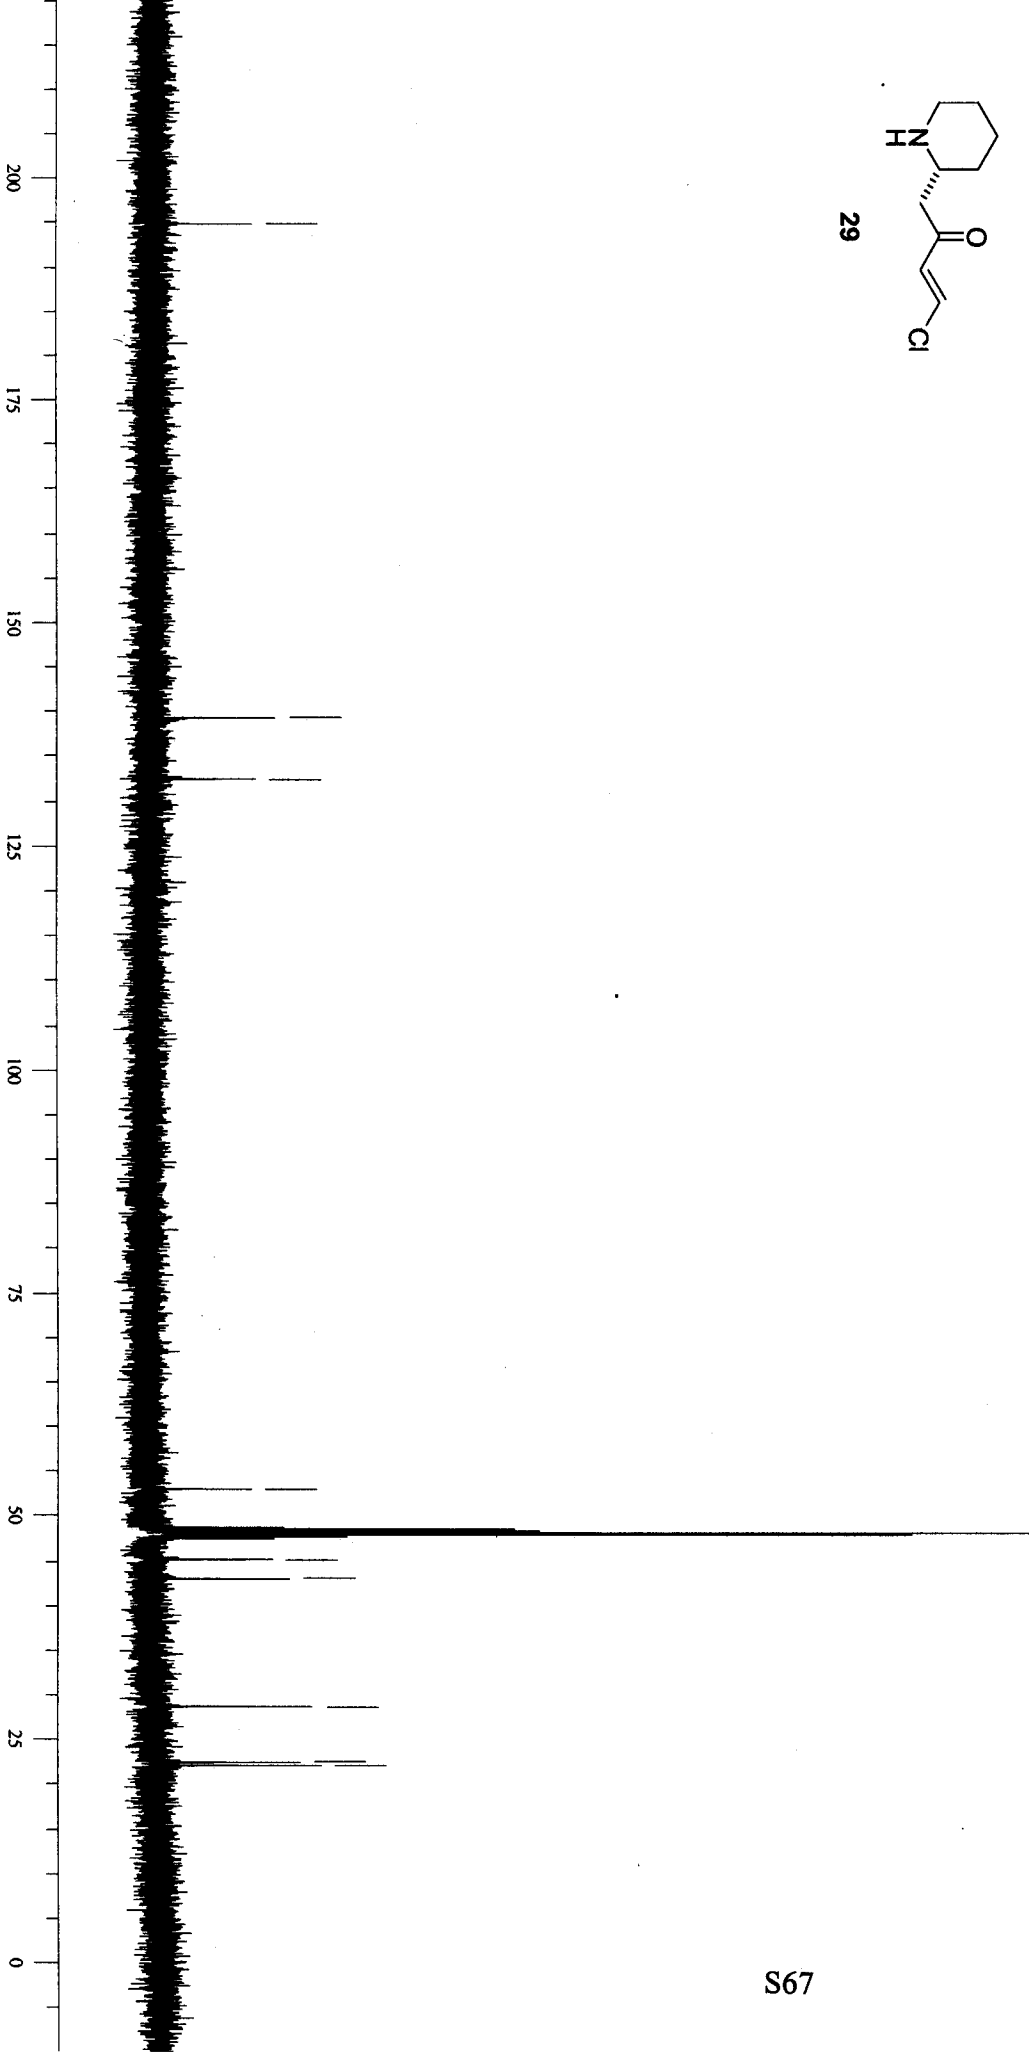

194.780

139.214

132.382

52.915

45.059

42.890

28.594

22.351

21.995

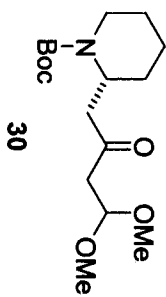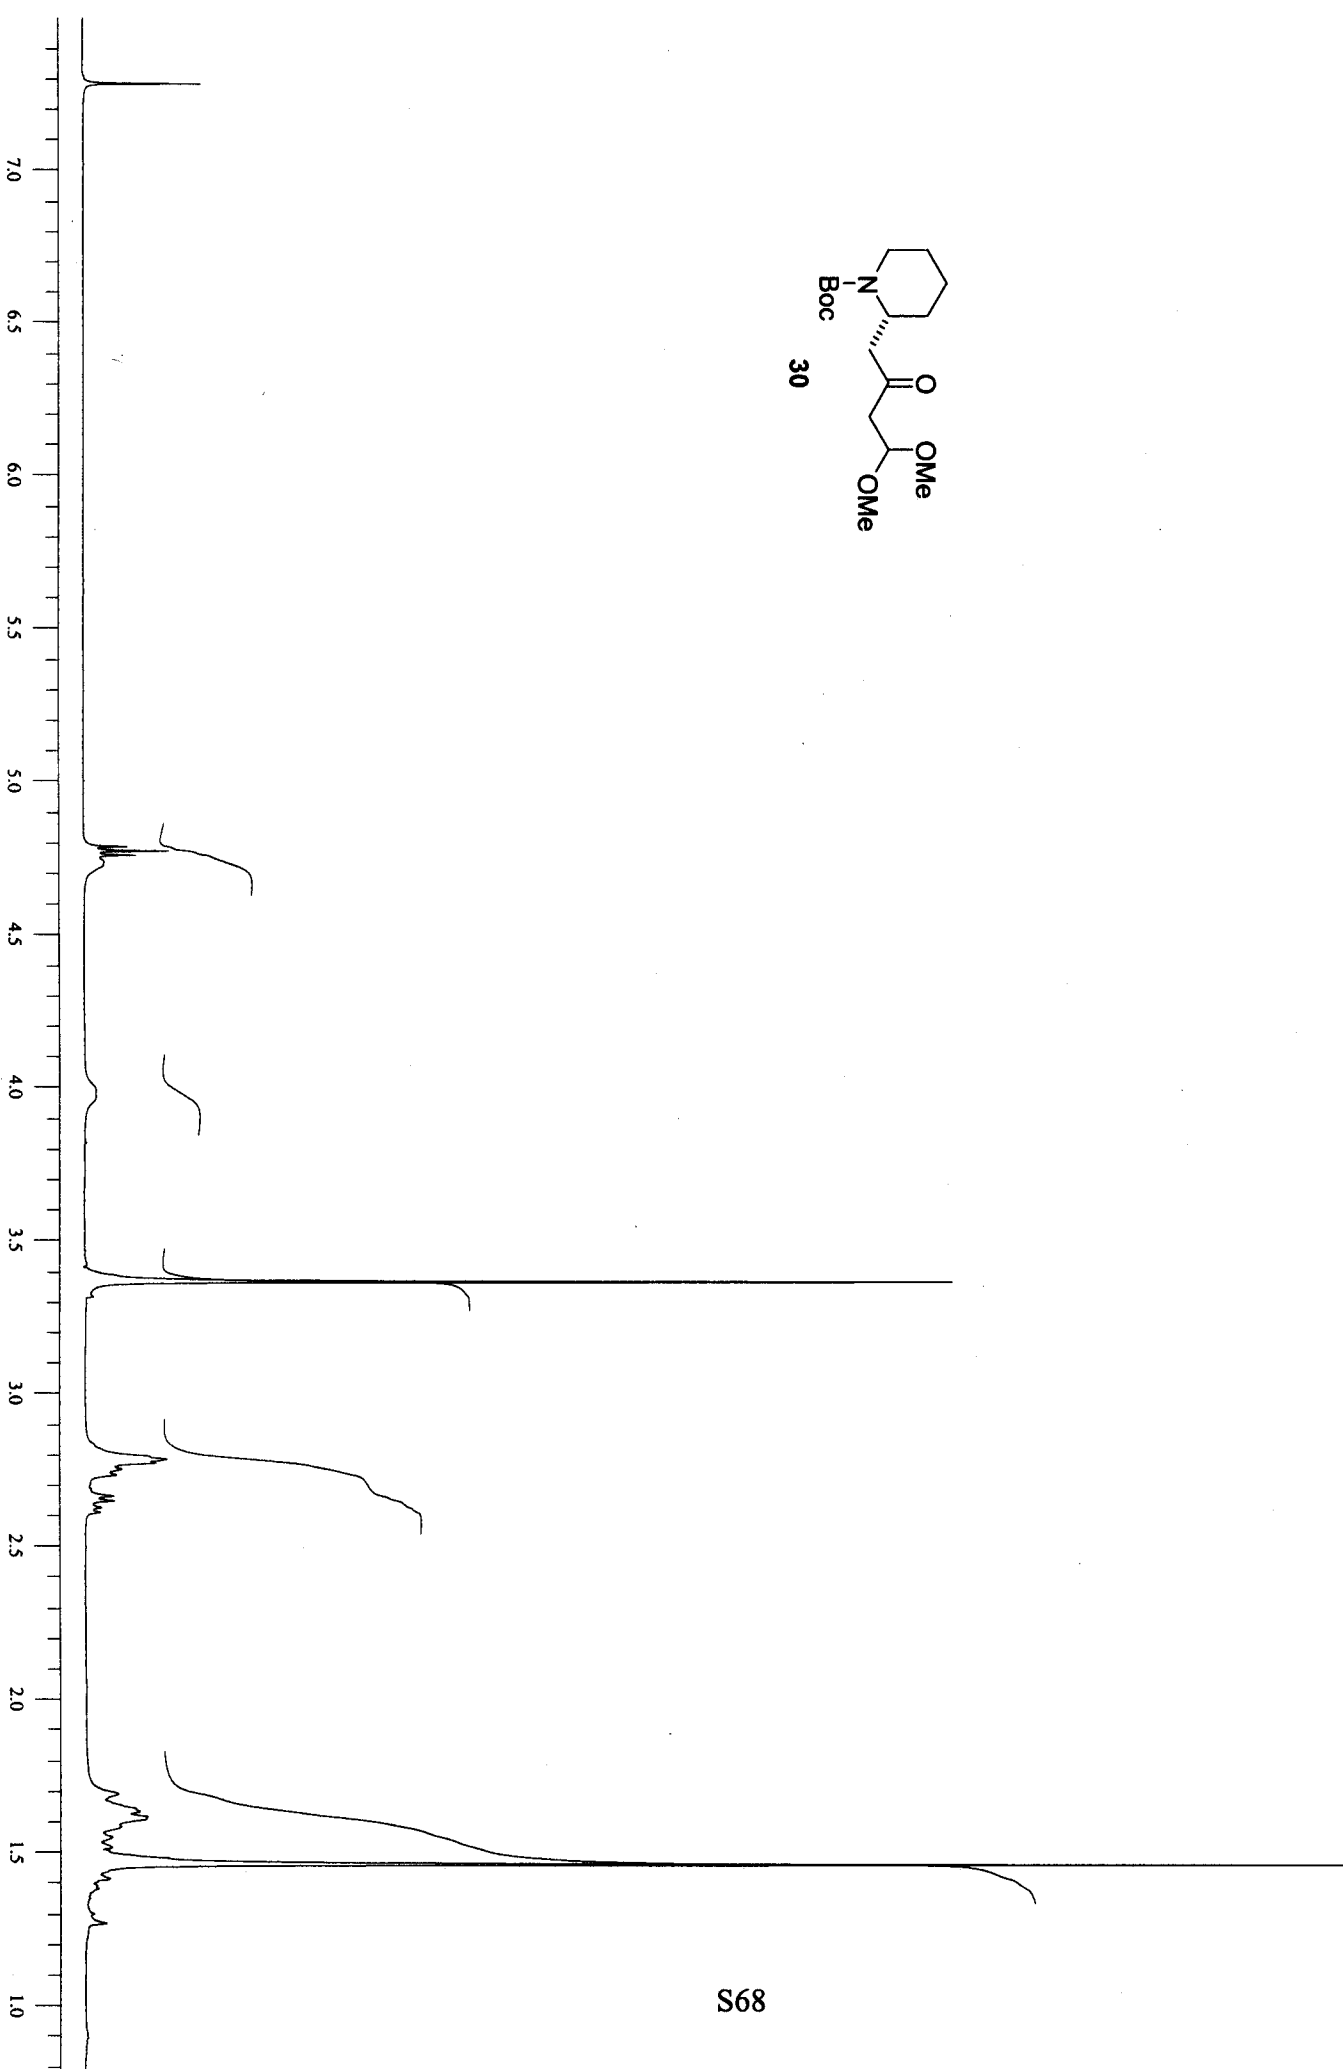

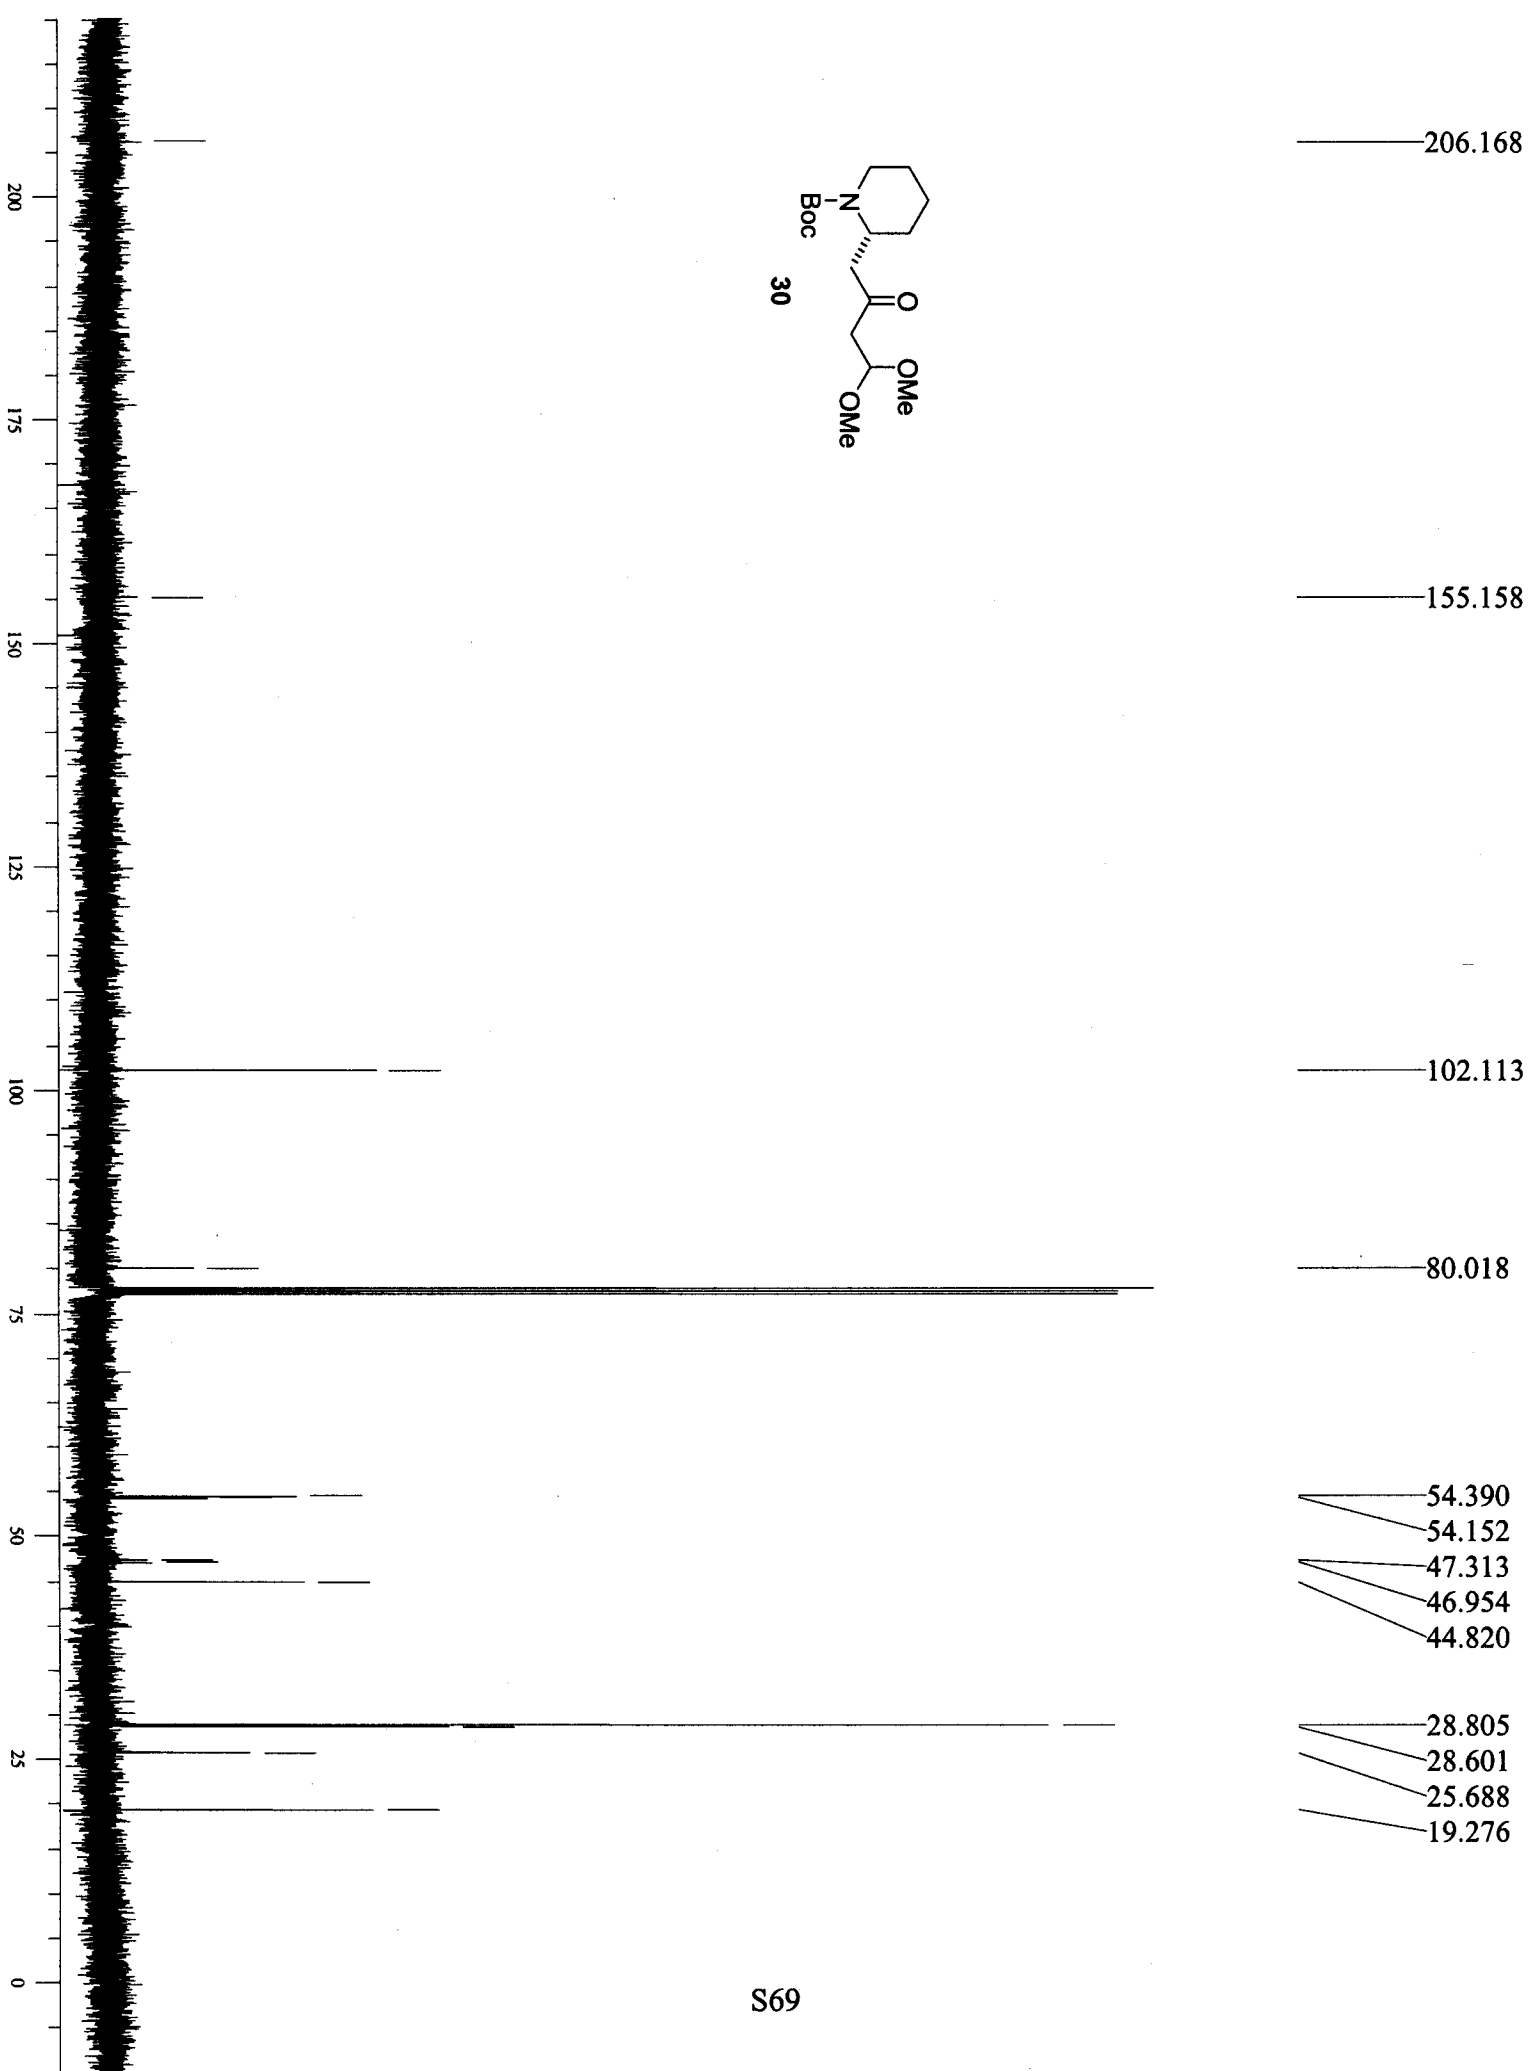

Supplement: NIHMS61163-supplement-si20060521_045.pdf [file NIHMS61163-supplement-si20060521_045.pdf]
